# Supplementary material
Source: PubMed Central journal article supplement (PMC4211877)
Supplement: NIHMS632489-supplement-Supplement1.pdf [file NIHMS632489-supplement-Supplement1.pdf]

## Supplementary Appendix

This appendix has been provided by the authors to give readers additional information about their work.

Supplement to: Spivak JL, Considine M, Williams DM, et al. Two clinical phenotypes in polycythemia vera. *N Engl J Med* 2014;371:808-17. DOI: 10.1056/NEJMoa1403141

## **Supplementary Appendix**

### Gene Expression Unmasks Two Clinical Phenotypes in Polycythemia Vera

Jerry L. Spivak, Michael Considine, Donna M. Williams, Conover C. Talbot Jr., Ophelia Rogers, Alison R. Moliterno,  
Chunfa Jie and Michael L. Ochs

## Supplementary Appendix

### Table of Contents

|                                                                                            |         |
|--------------------------------------------------------------------------------------------|---------|
| CD34+ cell isolation and analysis .....                                                    | Page 5  |
| Oligonucleotide microarray analysis .....                                                  | Page 6  |
| Q-RT-PCR validation of the microarray results .....                                        | Page 9  |
| Supervised analysis of the 19 patient cohort by top scoring pairs .....                    | Page 10 |
| External validation of the unsupervised hierarchical clustering by top scoring pairs ..... | Page 11 |
| Additional pathway analysis .....                                                          | Page 16 |
| Figure S1a .....                                                                           | Page 17 |
| Figure S1b .....                                                                           | Page 18 |
| Figure S2 .....                                                                            | Page 19 |
| Figure S3 .....                                                                            | Page 20 |
| Figure S4a .....                                                                           | Page 21 |
| Figure S4b .....                                                                           | Page 22 |
| Figure S5 .....                                                                            | Page 23 |
| Figure S6 .....                                                                            | Page 24 |
| Figure S7.....                                                                             | Page 25 |
| Figure S8 .....                                                                            | Page 26 |
| Table S1 .....                                                                             | Page 27 |

|                          |          |
|--------------------------|----------|
| Table S2a .....          | Page 29  |
| Figure S2b .....         | Page 38  |
| Table S3 .....           | Page 56  |
| Table S4 .....           | Page 57  |
| Table S5a .....          | Page 63  |
| Table S5b .....          | Page 90  |
| Table S6a.....           | Page 96  |
| Table S6b .....          | Page 101 |
| Table S7 .....           | Page 106 |
| Table S8 .....           | Page 107 |
| Table S9 a/b.....        | Page 108 |
| Table S10 .....          | Page 109 |
| Table S11 .....          | Page 110 |
| Table S12 .....          | Page 111 |
| Table S13 .....          | Page 112 |
| Table S14 .....          | Page 113 |
| Table S15 .....          | Page 115 |
| References .....         | Page 116 |
| Additional Reading ..... | Page 116 |

### **CD34+ cell isolation and analysis**

Peripheral blood CD34+ cells from PV patients were isolated from Ficoll Paque (G5 Healthcare, St. Louis, MO )-processed buffy coats with a purity of greater than 95% and a viability of 98% using immunomagnetic beads (Miltenyi, Auburn, CA) according to the manufacturer's instructions, and frozen at -80<sup>0</sup> C in 10% DMSO and 90% fetal bovine serum until studied. As controls, G-CSF mobilized peripheral blood CD34+ cells from three normal men and three normal women were obtained from commercial sources (AllCell Technologies LLC, Chicago, IL and StemCell Technologies Inc, Vancouver, BC).

The CD34+ cells were analyzed for CD34, CD38, CD33, CD41 and glycoporphin expression using commercially available fluorescent-labeled antibodies (Becton Dickinson, San Jose CA). Fluorescence of at least 10,000 cells was measured on a FACS Caliber and analyzed with Cellquest and Paint-a-gate software (BD Biosciences, San Jose, CA). Similar to published reports of the peripheral blood CD34+ cell immunophenotype in normal individuals and MPD patients <sup>1,2</sup>, CD34+ cells from both sources were greater than 98% CD38-positive and 85% CD33-positive; CD41 was expressed on less than 3% of CD34+ cells from both sources, while glycoporphin was not expressed by either

CD34+ cell population. Cell cycle analysis by flow cytometry using propidium iodide revealed that 91% of the PV and 90% of the mobilized normal CD34+ cells were in Go/G<sub>1</sub> (data not shown).

Total CD34+ cell RNA was isolated by the RNeasy technique (Qiagen, Valencia, CA) with an added DNase step according to the manufacturer's instructions. To confirm sample quality, we employed duplex RT-PCR to assess RNA integrity<sup>3</sup>, and the Agilent Bioanalyzer Lab on a Chip (Agilent Technologies, Inc., Santa Clara, CA) was used to confirm that all samples had an optimal rRNA ratio (1:2, for 18S and 28S, respectively), and clean run patterns before microarray analysis.

### **Oligonucleotide microarray analysis**

Total RNA samples were processed using the Affymetrix two-round RNA amplification protocol (Affymetrix, Santa Clara, CA). Briefly, 100ng of starting total RNA were used to synthesize first strand cDNA using oligonucleotide probes with 24 oligo-dT plus T7 promoter as primer (Proligo LLC, Boulder, CO), and the SuperScript Choice System (Invitrogen, Carlsbad, CA). Following the double stranded cDNA synthesis, the product was purified by Affymetrix sample clean up columns, and unlabeled ribonucleotides were used in a first round of in vitro transcription cRNA amplification (MegaScript, Ambion, Austin, TX). The following cycle of cDNA synthesis was started with random primers, and the oligo-dT with T7 promoter was again used as primer at the second strand cDNA synthesis step.

The ds cDNA product was again column purified. Subsequently, biotinylated anti-sense cRNA was generated through in vitro transcription using the BioArray RNA High Yield Transcript Labelling kit (ENZO Life Sciences Inc, Plymouth Meeting, PA). 15ug of the biotinylated labeled cRNA was fragmented at 94<sup>o</sup>C for 35 min (100mM Tris-acetate, pH 8.2, 500mM KOAc, 150mM MgOAc), and 10ug of total fragmented cRNA was hybridized to the Affymetrix human genome GeneChip array U133A for 16hr at 45<sup>o</sup>C with constant rotation (60 rpm). The Affymetrix Fluidics Station 450 was then used to wash and stain the chips, remove the non-hybridized target and incubate with a streptavidin-phycoerythrin conjugate to stain the biotinylated cRNA. The staining was amplified using goat IgG as blocking reagent and biotinylated goat streptavidin antibody, followed by a second staining step with a streptavidin-phycoerythrin conjugate.

Fluorescence was detected using the Affymetrix GS3000 GeneArray Scanner and image analysis of each GeneChip was done with the GeneChip Operating System software from Affymetrix (GCOS1.1.1), using the standard default settings. For comparison between different chips, global scaling was used, scaling all probe sets to a user-defined target intensity of 150. To assess the QC of the hybridization, chip image, and comparison between chips, the following parameters were studied: the scaling factor, related to the overall intensity of the chip, to confirm the similar signal intensity and staining throughout the samples; background estimation of nonspecific or cross-hybridization; percentage of transcripts that were considered significantly hybridized to the chip (present) by the

algorithm; RNA integrity by measurement of the ratio of 3' to 5' regions for the housekeeping gene GAPDH, since its presence in the chip and a ratio close to 1 indicates good integrity of the target sample; spikes (BioB/BioC), to confirm the detection level and sensitivity after hybridization.

The quality of the microarray experiments was assessed using the R/Bioconductor packages, affyPLM and affy. The graphics of Residual Images, NUSE, RLE and histograms were checked for image artifacts and outliers. Using the default algorithms for image analysis provided by Affymetrix, approximately 30%-45% of genes represented in the chips were recorded as present in the RNA samples, indicating good quality data. For quality control, we also analyzed differential calls (up or down regulated) and correlation analyses from the different replicates to demonstrate reproducibility amongst the experiments. Consistently, the Pearson's correlation coefficients obtained in these studies were between 0.97 and 0.99 for all replicated samples.

To achieve gene expression signal intensity estimates with a higher precision and a lower false discovery rate (FDR) in differential gene expression analysis, we used RMA (Robust Multiarray Analysis [www.bioconductor.org](http://www.bioconductor.org)) to obtain the gene level (probe set) expression signals. RMA also performs quantile normalization to reduce the obscuring variation between microarrays, which might be introduced during the processes of sample preparation, manufacture, fluorescence labeling, hybridization and scanning. With the expression signals estimated as above, a



parametric empirical Bayes statistical modeling method, which uses a hierarchical mixture model to account for differences amongst genes in their average expression levels and measurement fluctuations, was employed for differential gene expression analysis between the PV samples and the normal controls. Based on this method, posterior probabilities were obtained, from which inferences regarding differential expression patterns could be made. Specifically, a posterior probability of  $> 0.5$  was taken to assert significance in differential gene expression and minimize the false discovery rate. The microarray data were deposited as Series GSE47018 in the Gene Expression Omnibus MIAME compliant database at <http://www.ncbi.nlm.nih.gov/geo>.

#### **Q-RT-PCR validation of the microarray results**

To validate the microarray results, we analyzed additional CD34+ cell samples from a subset of the patients by real-time PCR (Q-RT-PCR) without prior RNA amplification. For the mRNA transcripts, first-strand cDNA synthesis was carried out on RNA extracted from the cells with the TaqMan Reverse Transcription Reagents kit (Applied Biosystems, Carlsbad CA.) using the oligo d (T)<sub>16</sub> RT primer following the manufacturer's suggested protocol. For miR-21 expression, CD34+ cell RNA was isolated using the mirVana miRNA Isolation Kit (Applied Biosystems) following the manufacturer's procedure for total RNA isolation. The TaqMan MicroRNA Reverse Transcription Kit (Applied Biosystems) was used as directed to generate cDNA.

Relative quantitation by Q-RT-PCR was carried out using the gene expression GEX or microRNA assays (Applied Biosystems) listed in **Table S3**. Duplicate 20  $\mu$ l reactions were set up using the TaqMan® Universal PCR Master Mix, No AmpErase® UNG (2X), and performed on an Applied Biosystems 7500 sequence detection system using the default “standard 7500” PCR conditions (95°C for 10 minutes followed by 40 cycles of 95°C for 15 seconds and 60°C for 1 minute). For each GEX primer/probe set, a standard curve with known relative concentrations of RNA from either a patient or normal control sample was used to calculate reaction efficiency and quantitate the reaction products. GAPDH reactions were run in parallel samples on the same assay plate. All the GEX Q-RT-PCR results were calculated using the “Standard Curve Assay” program of the 7500 SDS system (Applied Biosystems) and normalized to the GAPDH (glyceraldehyde-3-phosphate dehydrogenase) and the data are shown in Figure S3. For the miR-21 primer/probe set, relative quantitation using the  $\Delta\Delta C_T$  calculation method was utilized rather than a standard curve. U6 RNA was the reference RNA. In each case, the direction of gene expression (up or down) was the same for the Q-RT-PCR assay as for the microarray.

### **Supervised analysis of the 19 patient cohort by top scoring pairs**

EBarrays analysis was performed for male and female patients separately. The 549 probes that showed a posterior probability greater than 0.5 of differential expression between aggressive and indolent phenotypes in

both male and female patients were retained for further analysis, with both genders included. Top-scoring pair analysis<sup>4</sup> was run on the 549 probes and we retained the top 30 top-scoring pairs (TSPs). As some genes had duplicate probes, using the R limma package we applied an empirical Bayes test to this data (now both genders) and retained the highest scoring probe for each gene.<sup>5</sup> The dendrogram and heat map for the supervised analysis of the 19 PV patient cohort using the 30 top scoring pairs are shown in **Figure S5** and discussed in the Results section of the manuscript.

#### **External validation of the unsupervised hierarchical clustering by top scoring pairs**

For external validation with a test group of PV patients, instead of the 30 genes used for the supervised analysis of the original 19 patients (**Figure S5**), the number of TSP was narrowed to 6 to permit gene expression analysis by Q-RT-PCR rather than by microarray. Ten genes (PCNA, IFI30, TSN, CTSA, SMC4, CDKN1A, CTTN, SON, TIA1 and MYL9) were identified for the following pairwise comparisons: PCNA > IFI30; TSN > CTSA; SMC4 > CDKN1A; PCNA > CTTN; SON > CTTN and TIA1 > MYL9, scoring 1 for true and 0 for false with the prediction that a score of 5-6/6 indicated aggressive disease (**Figure S6**).

#### **Methods**

Since the 6 gene pair Q-RT-PCR assay compares 10 different genes in a single patient sample, absolute quantitation of RNA expression was employed, as opposed to comparing relative RNA expression levels, which can only compare the same gene in different samples. Therefore, with the exception of CTTN, which was obtained commercially (OriGene Technologies, Inc., Rockville, MD Catalogue No. SC124848), either a full length or partial cDNA of the targeted region for each gene was cloned into the plasmid pCR<sup>®</sup>2.1-TOPO<sup>®</sup> from patient CD34+ cell RNA using a TopoTA<sup>®</sup> cloning kit (Cat. No. K4520-01, Life Technologies, Grand Island, NY) according to the manufacturer's instructions (**Table S7**). These plasmids were then used to generate standard curves (**Figure S7**). Once optimized, three standard dilutions were chosen for use in the Q-RT-PCR assay based on the observed expression range of each gene. The Q-RT-PCR assays were performed using Applied Biosystems TaqMan<sup>®</sup> Gene Expression Assay kits for each of the 10 genes (**Table S8**). Copy numbers were calculated based on the known size and concentration of each plasmid.

Before assay, Beta-actin levels for each RNA sample were measured to determine if the RNA concentration and quality were acceptable for analysis (Applied Biosystems cat. # 4333762F; ACTB endogenous control).

Intra-assay precision was assessed by running all samples in duplicate. Replicate Ct values with standard deviations of greater than 0.5 were rejected. Inter-assay precision was assessed by performing replicate assays on

different days with fresh template cDNA from the same RNA sample from eight patients (**Table S9a**). In each case, the Q-RT-PCR assay generated the same calls, either 5-6/6 or < 5/6 (**Figure S6**).

In addition, extended inter-assay assessment was made by assaying the CD34+ cell RNA of 3 clinically stable patients from two separate blood draws within a 6 month period. Again, in all instances, there was no difference in the clinical phenotype stratification of these patients using the Q-RT-PCR assay (**Table S9b**).

## Results

### Training set

We used the available RNA samples from 7 of the original 19 patients (**Table S1**) as the training set to verify the validity of the Q-RT-PCR assay. One patient is included twice because her 10 gene assay score increased from 3 to 6 six months before overt transformation to acute leukemia occurred. As indicated in the scoring algorithm (**Figure S6**), a score of 5-6/6 was taken as an indication of aggressive disease.

**Table S10** shows the clinical features of these 7 patients according to gender, which conformed to the clinical features observed in the 19 patient cohort at study entry (**Table1**) except that no difference in the platelet count was observed in the smaller group. **Table S11** correlates the patients' clinical features with their 10 gene assay

scores, which again segregated the patients into the same phenotypes assigned by both the unsupervised hierarchical clustering. (**Figure 1 and Table 2**), and the supervised analysis using top scoring pairs (**Figure S5**). Patient numbers in this training set were too small to perform meaningful comparisons of most of their clinical features, but as shown in **Table S12**, they did differ significantly as expected with respect to disease duration, transformation to acute leukemia and survival.

### **Test set**

For external validation of the unsupervised hierarchical clustering results (**Figure 1 and Table 2**), a test set of 30 PV patients was selected and assayed in a blinded fashion. The selection criterion was the same as for the original 19 patients, sufficient CD34+ cell RNA for analysis. The clinical features of the 30 patients according to gender are shown in **Table S13** and as with the original 19 patient cohort (**Table 1**), with the exception of the platelet count, were no differences between the men and women patients. Their individual clinical features and 10 gene assay scores are shown in **Table S14**.

As shown in **Table S15**, patient clinical phenotypes segregated according to the 10 gene assay score. Congruent with both the results of the unsupervised hierarchical clustering (**Table 2**) and top scoring pairs analysis using 30 genes (**Figure S5**), a clinical score of 5 or 6/6 correlated with an aggressive phenotype, with a significantly higher

incidence of thrombosis, splenomegaly, greater spleen size and more exposure to chemotherapy. Disease duration was also greater in this group. In contrast to the original 19 patients, however, there was no difference in hemoglobin level but platelet counts were lower in the patients scoring 5-6/6. The allele burden was also higher in the aggressive group, consistent with their longer disease duration and the absence of JAK2 V617F heterozygous patients in this group; however, this is a distinction without a difference since clonal dominance was the rule in both groups as in the original 19 patients (**Table 1**).

As shown in **Figure S8**, the AUC of the ROC curve for these results was 0.925 and, as predicted, setting the call of an aggressive phenotype at 5-6/6, had a sensitivity of 0.875 and specificity of 1.0. The positive predictive value (PPV) at this threshold was 1.0 and the negative predictive value (NPV) was 0.95.

No patient in the test group transformed to acute leukemia and only one died, which may reflect the shorter prospective observation period for this group (mean 1 year) in contrast to initial 19 patient cohort (mean of 4 years for the aggressive patients and 7 years for the indolent patients); the low incidence of splenectomy reflects our current practice to avoid this procedure if at all possible. Taking everything together, the results of the 10 gene Q-RT-PCR assay in the 30 patient test group recapitulated the segregation of the original 19 PV patient cohort into aggressive and indolent phenotypes by unsupervised hierarchical clustering (**Figure 1 and Table 2**).

### **Additional pathway analyses**

To determine if accounting for gender was critical, we performed analysis on the entire set of deregulated genes (i.e., the union of the male and female sets rather than the intersection). Using empirical Bayes analysis, only one gene in this set, XIST, was significantly differentially regulated between PV patients and normal controls after Benjamini-Hochberg (B-H) multiple testing correction. This X-linked gene may likely be a false-positive as well, arising from the mixing of male and female patients and normals in unequal proportions. Gene set analysis of the ranked gene list identified no significant pathways after B-H correction (data not shown).

We also interrogated male and female gene expression separately by IPA (Ingenuity Systems) as well as KEGG. With IPA, there was significant pathway overlap between the men and women patients (data not shown), while with KEGG analysis (**Figures S2a and b**), as discussed in the main body of the text, there was differential regulation of 12 pathways in the women patients that were not upregulated in the men.



Figure S1a. KEGG Pathways – Males.

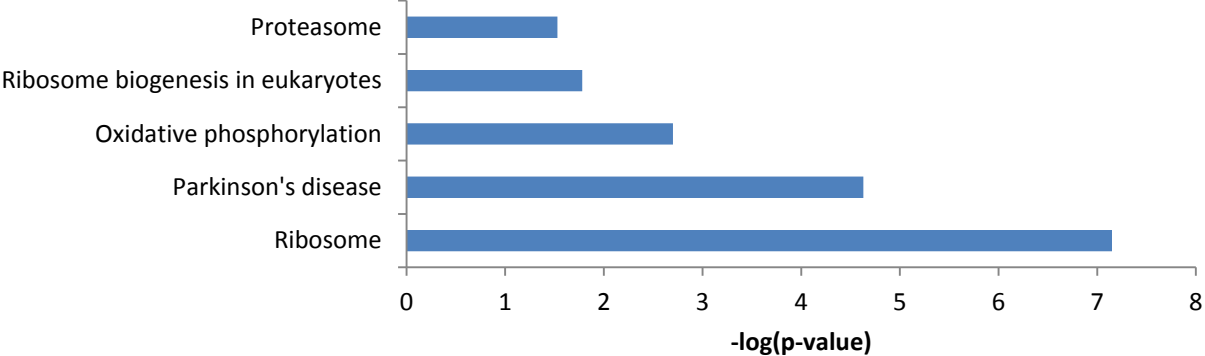

Figure S1b. KEGG Pathways – Females.

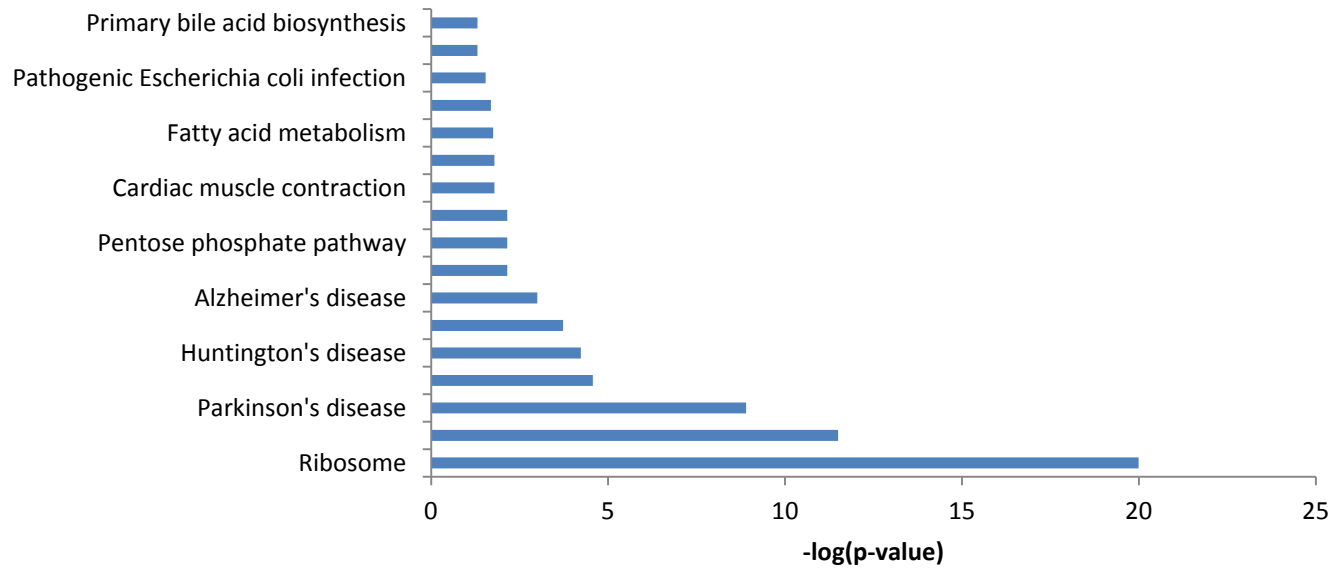

Figure S2. Venn diagram illustrating the differential and concordant deregulation of gene expression by the male and female PV patients.

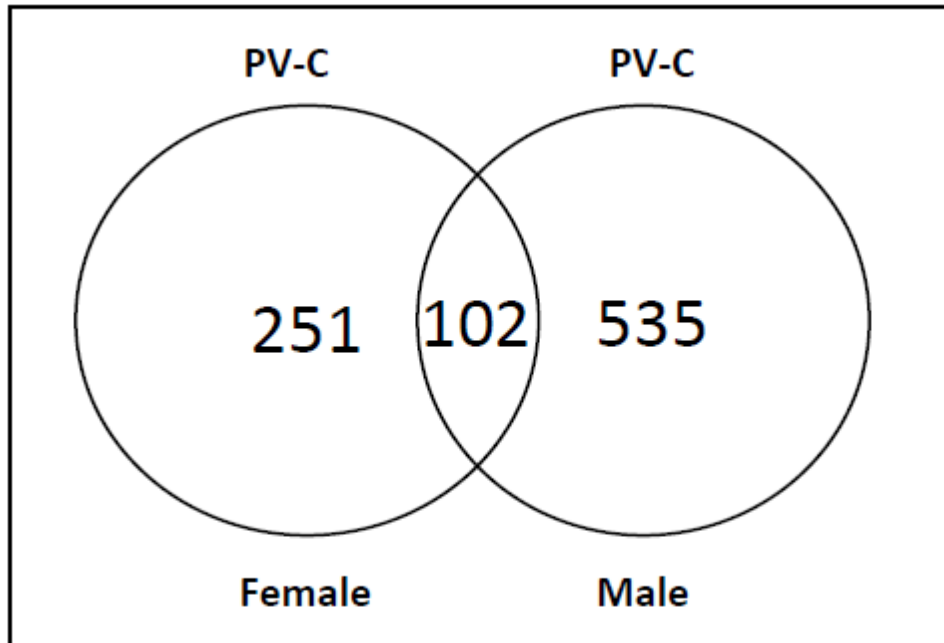

Figure S3. Q-RT-PCR confirmation of gene expression in PV CD34+ cells using the primer/probe sets listed in Table S3.

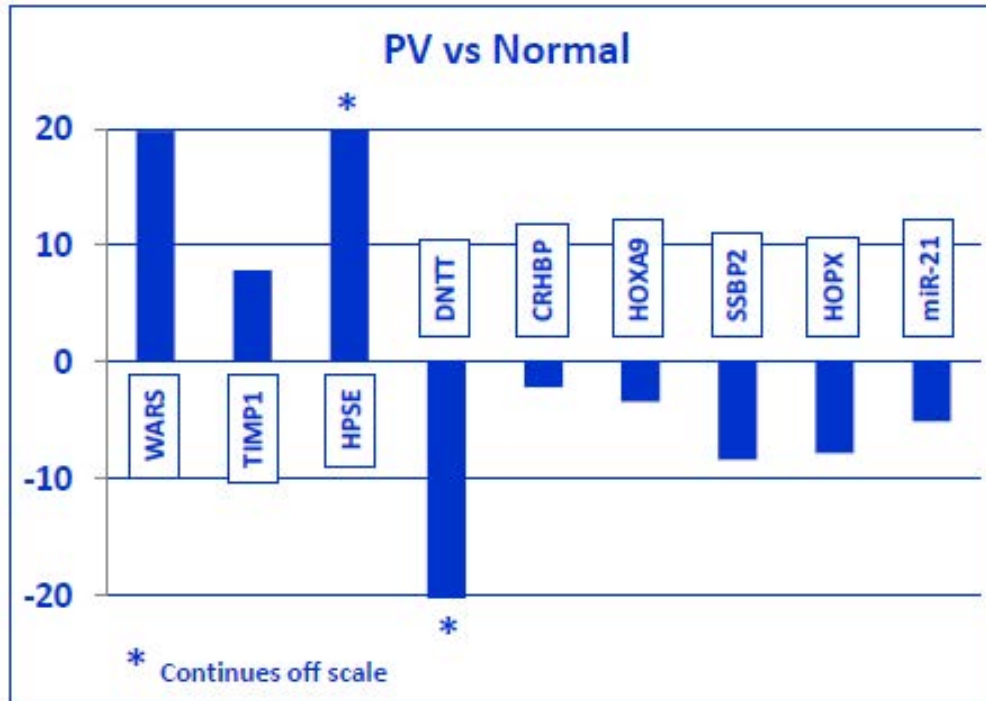

Figure S4a. KEGG Pathways- Indolent Group.

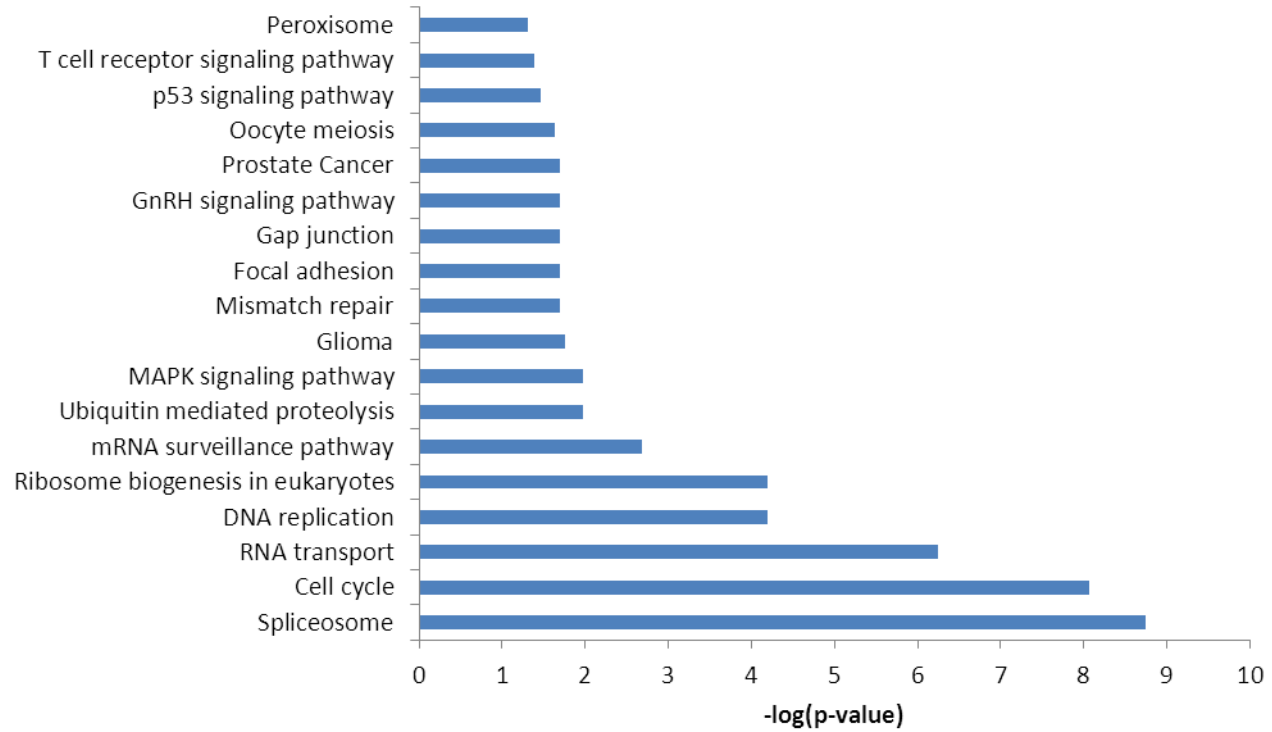

Figure S4b. KEGG Pathways -Aggressive Group.

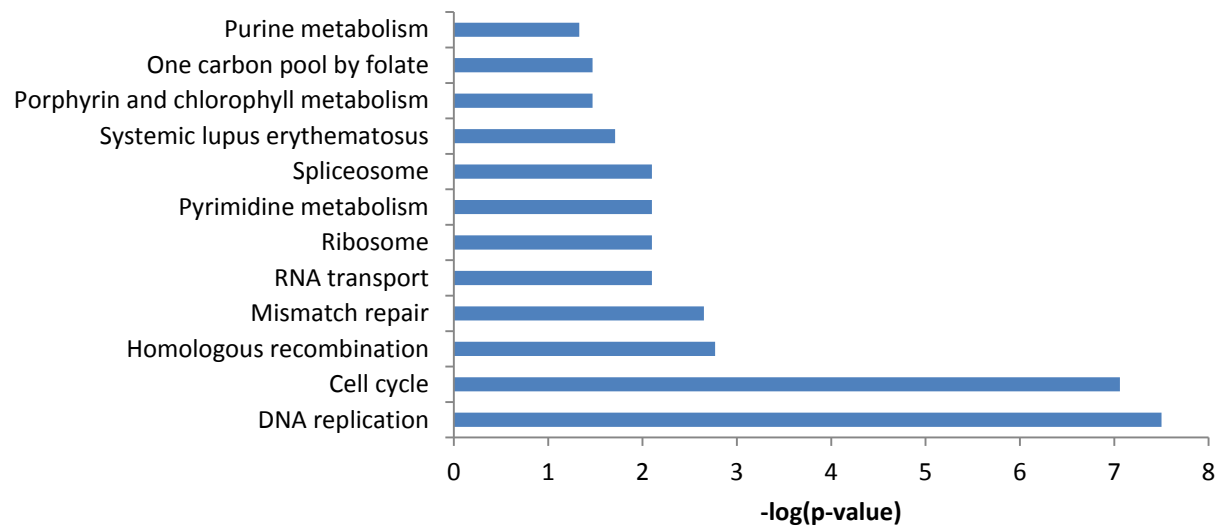

Figure S5. Heat map of the supervised clustering of the 19 PV patients using the 30 genes identified by top scoring pairs analysis. For the heat map, red indicates decreased gene expression and green increased gene expression. Each column represents one patient and each row a single gene.

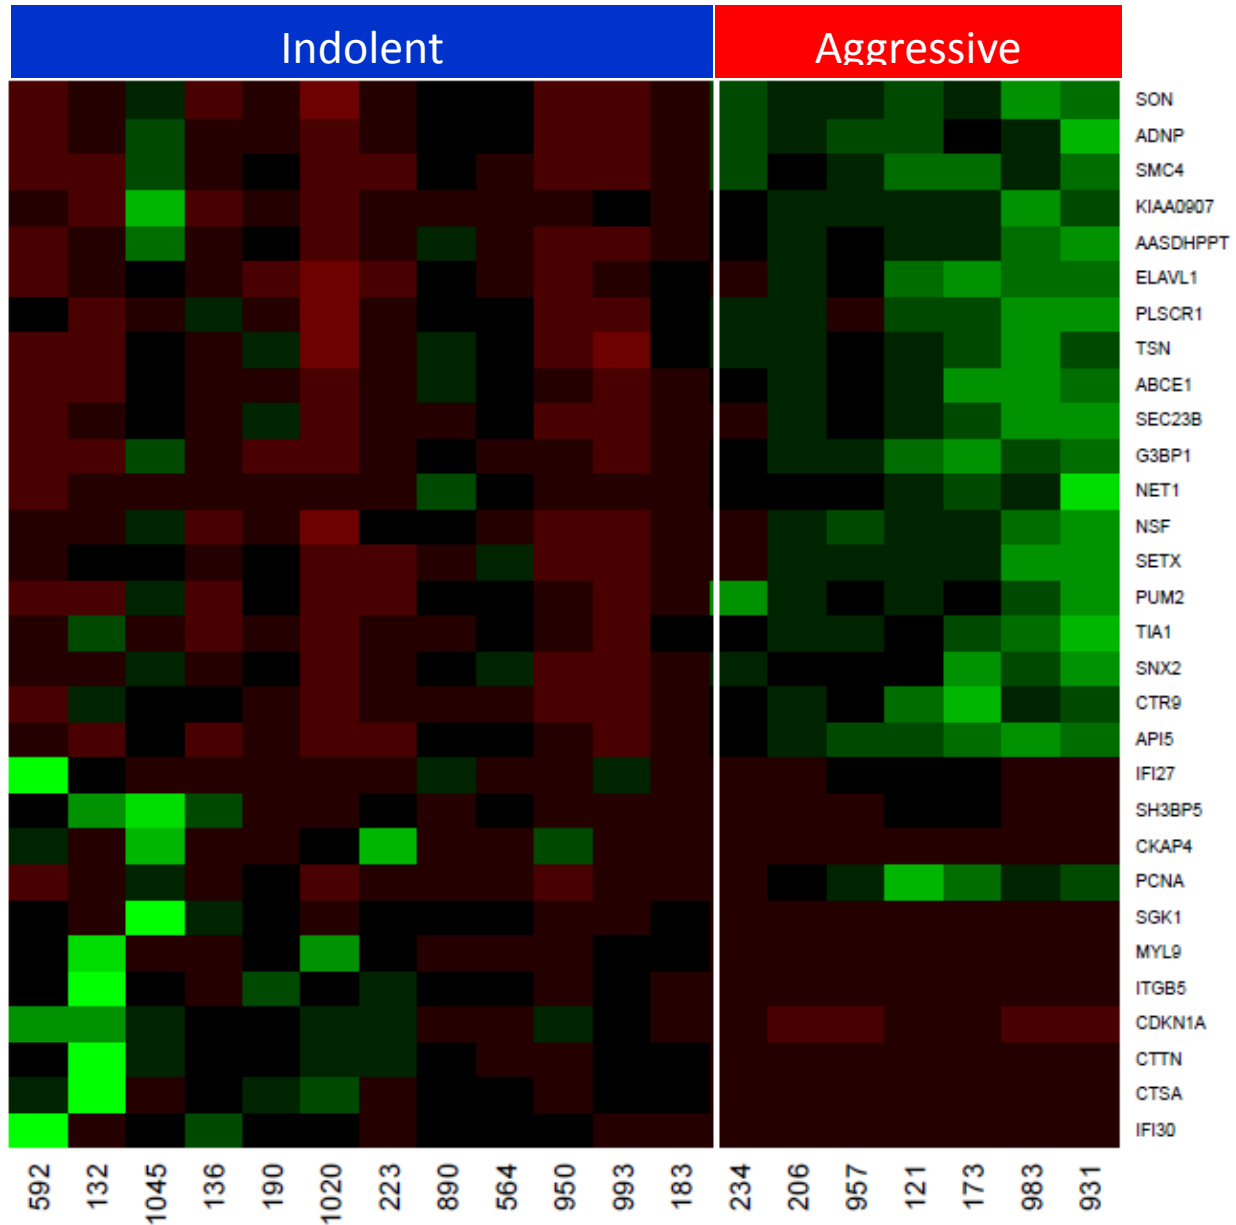

Figure S6. Algorithm for clinical stratification of PV patients by the ten gene assay.

**Ten Gene Assay Panel**

Measure the transcript levels for the following 10 genes:

**PCNA, IFI30, TSN, CTSA, SMC4, CTTN, CDKN1A, SON, TIA1, MYL9**

Make the following gene transcript level comparisons:

**PCNA > IFI30**

**TSN > CTSA**

**SMC4 > CDKN1A**

**PCNA > CTTN**

**SON > CTTN**

**TIA1 > MYL9**

- If **TRUE** score **1**

- If **FALSE** score **0**

Probability for Aggressive Disease = Score of 5-6/6



Figure S7. Standard curves for quantitation of transcript copy numbers for each of the genes used in the ten gene assay.

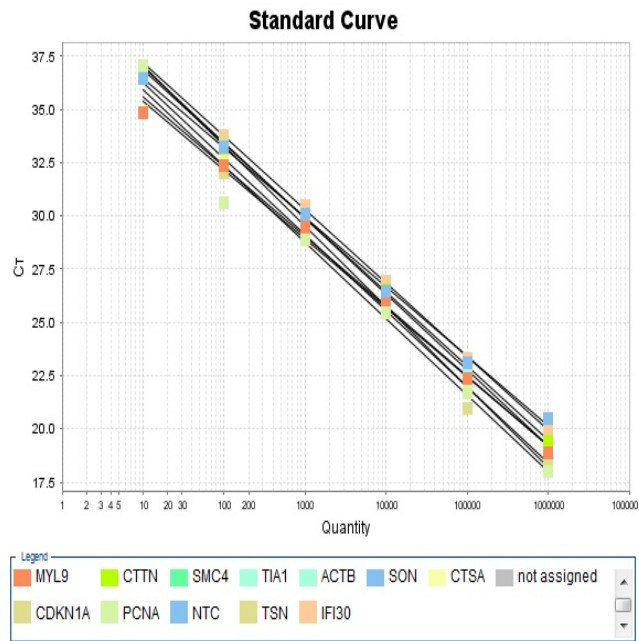

| Sample | Slope | Y-intercept | R <sup>2</sup> | % efficiency |
|--------|-------|-------------|----------------|--------------|
| CDKN1A | -3.57 | 39.8        | 0.995          | 90.5         |
| CTSA   | -3.27 | 38.8        | 0.995          | 102.2        |
| CTTN   | -3.47 | 40.3        | 1.000          | 94.0         |
| IFI30  | -3.44 | 40.6        | 0.999          | 95.3         |
| MYL9   | -3.23 | 38.6        | 0.996          | 103.9        |
| PCNA   | -3.58 | 39.5        | 0.981          | 90.3         |
| SMC4   | -3.28 | 40.4        | 0.994          | 101.9        |
| SON    | -3.26 | 39.7        | 0.998          | 102.8        |
| TIA1   | -3.56 | 40.5        | 1.000          | 91.0         |
| TSN    | -3.77 | 40.8        | 0.994          | 84.1         |

Figure S8. Receiver Operating Characteristic (ROC) Curve for the ten gene assay using the 30 PV patient test group.

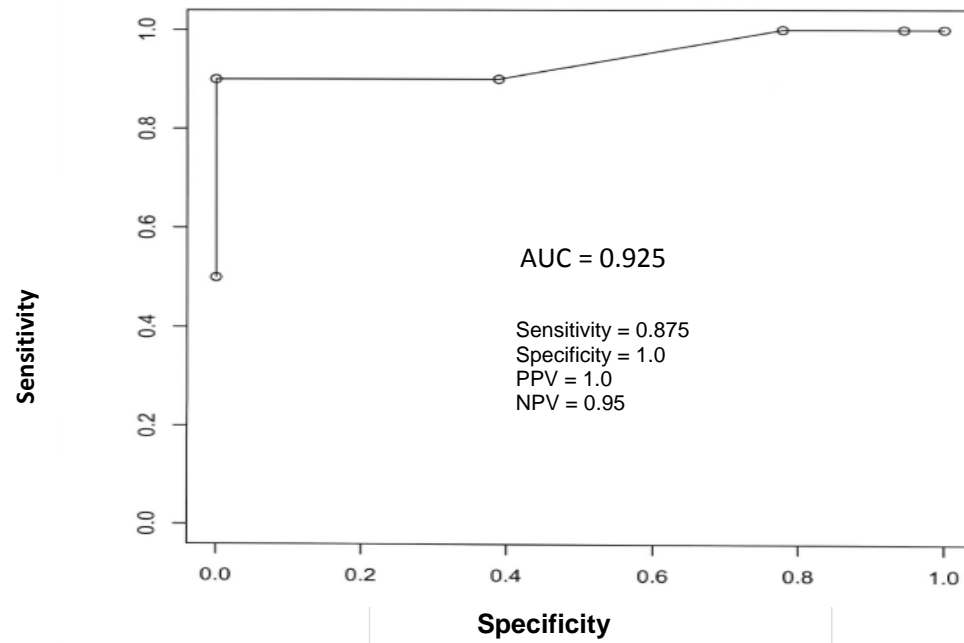

Table S1. Clinical Features of the 19 Polycythemia Vera Patients at Study Entry.

| Gender   | Age (years) | Disease Duration (years) | Hemoglobin (g/dL) (g/L) | Leukocyte count ( $10^3/\mu\text{L}$ ) ( $10^9/\text{L}$ ) | Platelet count ( $10^3/\mu\text{L}$ ) ( $10^9/\text{L}$ ) | Spleen size (cm below the left costal margin) | Splenectomy | JAK2 V617F neutrophil allele burden (%) | Thrombosis               | Therapy                                       |
|----------|-------------|--------------------------|-------------------------|------------------------------------------------------------|-----------------------------------------------------------|-----------------------------------------------|-------------|-----------------------------------------|--------------------------|-----------------------------------------------|
| Male     | 74          | 7                        | 12.9 (129)              | 17.620                                                     | 388.000                                                   | 32                                            | No          | 100                                     | No                       | Phlebotomy, Anagrelide, Hydroxyurea, Busulfan |
| Male     | 66          | 20                       | 8.3 (83)                | 177.190                                                    | 454.000                                                   | 25                                            | Yes         | 100                                     | Arterial                 | Phlebotomy, Thalidomide, Cytoxan              |
| Female   | 55          | 13                       | 11.1 (111)              | 33.110                                                     | 802.000                                                   | 20                                            | Yes         | 100                                     | Portal and hepatic veins | Phlebotomy, Hydroxyurea, Cytoxan, Anagrelide  |
| Female   | 74          | 8                        | 11.7 (117)              | 10.720                                                     | 366.000                                                   | 8                                             | No          | 68                                      | Hepatic vein             | Anagrelide, Hydroxyurea                       |
| Male     | 63          | 16                       | 9.3 (93)                | 10.020                                                     | 171.000                                                   | 8                                             | Yes         | 86                                      | No                       | Phlebotomy, Hydroxyurea                       |
| Female*  | 48          | 18                       | 10.4 (104)              | 50.070                                                     | 1,017.000                                                 | 5                                             | Yes         | 100                                     | Arterial and venous      | Phlebotomy, Hydroxyurea, Busulfan, Imatinib   |
| Male*    | 72          | 25                       | 12.5 (125)              | 16.770                                                     | 491.000                                                   | 20                                            | Yes         | 100                                     | No                       | Phlebotomy, Hydroxyurea, Cytoxan              |
| Male*    | 72          | 1                        | 13.7 (137)              | 16.490                                                     | 712.000                                                   | 0                                             | No          | 68                                      | No                       | Phlebotomy                                    |
| Female   | 68          | 11                       | 13.0 (130)              | 11.980                                                     | 865.000                                                   | 5                                             | No          | 67                                      | No                       | Phlebotomy                                    |
| Male     | 73          | 4                        | 14.3 (143)              | 16.610                                                     | 151.000                                                   | 12.5                                          | No          | 95                                      | No                       | Phlebotomy                                    |
| Male     | 82          | 25                       | 15.9 (159)              | 4.430                                                      | 197.000                                                   | 0                                             | No          | 50                                      | Arterial                 | Phlebotomy, Hydroxyurea                       |
| Female** | 76          | 10                       | 11.5 (115)              | 5.080                                                      | 948.000                                                   | 0                                             | No          | 52                                      | No                       | Phlebotomy, Hydroxyurea                       |
| Male     | 57          | 4                        | 13.6                    | 19.970                                                     | 810.000                                                   | 0                                             | No          | 88                                      | No                       | Phlebotomy                                    |

|         |    |    |               |        |           |    |    |     |    |                            |
|---------|----|----|---------------|--------|-----------|----|----|-----|----|----------------------------|
|         |    |    | (136)         |        |           |    |    |     |    |                            |
| Female  | 57 | 12 | 13.0<br>(130) | 19.530 | 1,119.000 | 8  | No | 60  | No | Phlebotomy,<br>Hydroxyurea |
| Female  | 51 | 5  | 10.7<br>(107) | 19.130 | 1,052.000 | 5  | No | 100 | No | Phlebotomy                 |
| Female* | 46 | 4  | 11.1<br>(111) | 20.520 | 1,480.000 | 0  | No | 82  | No | Phlebotomy                 |
| Female  | 67 | 7  | 14.5<br>(145) | 27.270 | 191.000   | 14 | No | 100 | No | Phlebotomy                 |
| Female* | 60 | 9  | 12.5<br>(125) | 13.870 | 1,176.000 | 4  | No | 60  | No | Phlebotomy                 |
| Female* | 71 | 1  | 14.7<br>(147) | 22.790 | 332.000   | 0  | No | 100 | No | Phlebotomy,                |

\*Denotes patients subsequently used as the training set for the 10 gene assay (see the Supplementary Appendix). \*\*Denotes a training set patient evaluated with the 10 gene assay both before and after transformation to aggressive phase disease (see the Supplementary Appendix).

Table S2a. Genes differentially regulated by female PV patients compared to normal female controls.

| <i>ProbesetID</i> | <i>Symbol<br/>(Na32<br/>consensus<br/>Mar13)</i> | <i>Gene Title (Na32 consensus Mar13)</i>                                                    | <i>Entrez<br/>GeneID<br/>(consensus<br/>Mar-13)</i> | <i>Log2(FC)</i> | <i>P-Value</i> | <i>Adjusted<br/>P-Value</i> |
|-------------------|--------------------------------------------------|---------------------------------------------------------------------------------------------|-----------------------------------------------------|-----------------|----------------|-----------------------------|
| 204805_s_at       | H1FX                                             | H1 histone family, member X                                                                 | 8971                                                | 1.91935         | 0.00114        | 0.1019                      |
| 202888_s_at       | ANPEP                                            | alanyl (membrane) aminopeptidase                                                            | 290                                                 | 1.43197         | 0.001209       | 0.1019                      |
| 213326_at         | VAMP1                                            | vesicle-associated membrane protein 1 (synaptobrevin 1)                                     | 6843                                                | 1.380311        | 0.001564       | 0.1019                      |
| 212543_at         | AIM1                                             | absent in melanoma 1                                                                        | 202                                                 | 1.689059        | 0.002053       | 0.1019                      |
| 201427_s_at       | SEPP1                                            | selenoprotein P, plasma, 1                                                                  | 6414                                                | 1.427475        | 0.003366       | 0.125981                    |
| 206674_at         | FLT3                                             | fms-related tyrosine kinase 3                                                               | 2322                                                | 1.701119        | 0.003846       | 0.125981                    |
| 206385_s_at       | ANK3                                             | ankyrin 3, node of Ranvier (ankyrin G)                                                      | 288                                                 | 1.257882        | 0.004488       | 0.125981                    |
| 209487_at         | RBPMS                                            | RNA binding protein with multiple splicing                                                  | 11030                                               | 1.23478         | 0.00567        | 0.125981                    |
| 219871_at         | FLJ13197                                         | uncharacterized FLJ13197                                                                    | 79667                                               | 1.301817        | 0.005704       | 0.125981                    |
| 209488_s_at       | RBPMS                                            | RNA binding protein with multiple splicing                                                  | 11030                                               | 1.275396        | 0.006845       | 0.125981                    |
| 221645_s_at       | ZNF83                                            | zinc finger protein 83                                                                      | 55769                                               | 1.200283        | 0.007674       | 0.125981                    |
| 213005_s_at       | KANK1                                            | KN motif and ankyrin repeat domains 1                                                       | 23189                                               | 1.707475        | 0.008166       | 0.125981                    |
| 213817_at         | IRAK3                                            | interleukin-1 receptor-associated kinase 3                                                  | 11213                                               | 1.218239        | 0.010346       | 0.125981                    |
| 202039_at         | MYO18A                                           | myosin XVIII A                                                                              | 399687                                              | 1.175294        | 0.011058       | 0.125981                    |
| 210644_s_at       | LAIR1                                            | leukocyte-associated immunoglobulin-like receptor 1                                         | 3903                                                | 1.348313        | 0.011154       | 0.125981                    |
| 204352_at         | TRAF5                                            | TNF receptor-associated factor 5                                                            | 7188                                                | 1.125428        | 0.012268       | 0.125981                    |
| 214290_s_at       | HIST2H2AA4                                       | histone cluster 2, H2aa4                                                                    | 723790                                              | 1.879605        | 0.013116       | 0.125981                    |
| 222146_s_at       | TCF4                                             | transcription factor 4                                                                      | 6925                                                | 1.385756        | 0.013155       | 0.125981                    |
| 59375_at          | MYO15B                                           | myosin XVB pseudogene                                                                       | 80022                                               | 1.108123        | 0.013372       | 0.125981                    |
| 206486_at         | LAG3                                             | lymphocyte-activation gene 3                                                                | 3902                                                | 0.994363        | 0.014533       | 0.125981                    |
| 212794_s_at       | KIAA1033                                         | KIAA1033                                                                                    | 23325                                               | 1.287389        | 0.014972       | 0.125981                    |
| 218086_at         | NPDC1                                            | neural proliferation, differentiation and control, 1                                        | 56654                                               | 1.013593        | 0.015204       | 0.125981                    |
| 218280_x_at       | HIST2H2AA4                                       | histone cluster 2, H2aa4                                                                    | 723790                                              | 1.830191        | 0.01535        | 0.125981                    |
| 213655_at         | YWHAE                                            | tyrosine 3-monooxygenase/tryptophan 5-monooxygenase activation protein, epsilon polypeptide | 7531                                                | -1.40323        | 0.015549       | 0.125981                    |

|             |           |                                                                                                                                     |       |          |          |          |
|-------------|-----------|-------------------------------------------------------------------------------------------------------------------------------------|-------|----------|----------|----------|
| 219173_at   | MYO15B    | myosin XVB pseudogene                                                                                                               | 80022 | 1.147267 | 0.016111 | 0.127919 |
| 212587_s_at | PTPRC     | protein tyrosine phosphatase, receptor type, C                                                                                      | 5788  | 1.942028 | 0.016627 | 0.128539 |
| 218312_s_at | ZSCAN18   | zinc finger and SCAN domain containing 18                                                                                           | 65982 | 1.539329 | 0.017836 | 0.128539 |
| 207836_s_at | RBPMS     | RNA binding protein with multiple splicing                                                                                          | 11030 | 1.091491 | 0.018254 | 0.128539 |
| 207426_s_at | TNFSF4    | tumor necrosis factor (ligand) superfamily, member 4                                                                                | 7292  | 1.381424 | 0.019204 | 0.129221 |
| 212762_s_at | TCF7L2    | transcription factor 7-like 2 (T-cell specific, HMG-box)                                                                            | 6934  | 1.046634 | 0.019813 | 0.129892 |
| 209398_at   | HIST1H1C  | histone cluster 1, H1c                                                                                                              | 3006  | 1.60555  | 0.020228 | 0.129892 |
| 211675_s_at | MDFIC     | MyoD family inhibitor domain containing                                                                                             | 29969 | 1.155886 | 0.020685 | 0.129892 |
| 206133_at   | XAF1      | XIAP associated factor 1                                                                                                            | 54739 | 1.158372 | 0.020857 | 0.129892 |
| 218966_at   | MYO5C     | myosin VC                                                                                                                           | 55930 | 1.536923 | 0.02094  | 0.129892 |
| 214455_at   | HIST1H2BC | histone cluster 1, H2bc                                                                                                             | 8347  | 1.482403 | 0.023205 | 0.131273 |
| 205471_s_at | DACH1     | dachshund homolog 1 (Drosophila)                                                                                                    | 1602  | 0.95962  | 0.023854 | 0.131273 |
| 218346_s_at | SESN1     | sestrin 1                                                                                                                           | 27244 | 1.057229 | 0.024057 | 0.131273 |
| 209993_at   | ABCB1     | ATP-binding cassette, sub-family B (MDR/TAP), member 1                                                                              | 5243  | 1.012543 | 0.024783 | 0.131273 |
| 206710_s_at | EPB41L3   | erythrocyte membrane protein band 4.1-like 3                                                                                        | 23136 | 0.977202 | 0.024885 | 0.131273 |
| 202708_s_at | HIST2H2BE | histone cluster 2, H2be                                                                                                             | 8349  | 1.769114 | 0.02667  | 0.131273 |
| 200986_at   | SERPING1  | serpin peptidase inhibitor, clade G (C1 inhibitor), member 1<br>egf-like module containing, mucin-like, hormone receptor-<br>like 1 | 710   | 1.048714 | 0.026758 | 0.131273 |
| 207111_at   | EMR1      | like 1                                                                                                                              | 2015  | 1.04867  | 0.026977 | 0.131273 |
| 219355_at   | CXorf57   | chromosome X open reading frame 57                                                                                                  | 55086 | 0.956366 | 0.027482 | 0.131273 |
| 201196_s_at | AMD1      | adenosylmethionine decarboxylase 1                                                                                                  | 262   | 1.127364 | 0.02763  | 0.131273 |
| 207564_x_at | OGT       | O-linked N-acetylglucosamine (GlcNAc) transferase                                                                                   | 8473  | 1.180955 | 0.027642 | 0.131273 |
| 202686_s_at | AXL       | AXL receptor tyrosine kinase                                                                                                        | 558   | -1.17476 | 0.027808 | 0.131273 |
| 208268_at   | ADAM28    | ADAM metallopeptidase domain 28                                                                                                     | 10863 | 1.222576 | 0.028106 | 0.131273 |
| 215307_at   | ZNF529    | zinc finger protein 529                                                                                                             | 57711 | 1.029099 | 0.028782 | 0.132865 |
| 219571_s_at | ZNF12     | zinc finger protein 12                                                                                                              | 7559  | 1.033403 | 0.030225 | 0.136525 |
| 209994_s_at | ABCB1     | ATP-binding cassette, sub-family B (MDR/TAP), member 1                                                                              | 5243  | 0.988532 | 0.030956 | 0.136933 |
| 212560_at   | SORL1     | sortilin-related receptor, L(DLR class) A repeats containing                                                                        | 6653  | 1.232375 | 0.031193 | 0.136933 |
| 205767_at   | EREG      | epiregulin                                                                                                                          | 2069  | 1.576209 | 0.032309 | 0.137923 |
| 221718_s_at | AKAP13    | A kinase (PRKA) anchor protein 13                                                                                                   | 11214 | 0.990575 | 0.033371 | 0.139481 |
| 214472_at   | HIST1H2AD | histone cluster 1, H2ad                                                                                                             | 3013  | 1.221696 | 0.034306 | 0.139481 |
| 209447_at   | SYNE1     | spectrin repeat containing, nuclear envelope 1                                                                                      | 23345 | 1.026492 | 0.034672 | 0.139481 |
| 207571_x_at | THEMIS2   | thymocyte selection associated family member 2                                                                                      | 9473  | 1.23688  | 0.035236 | 0.139481 |

|             |           |                                                                                       |       |          |          |          |
|-------------|-----------|---------------------------------------------------------------------------------------|-------|----------|----------|----------|
| 210785_s_at | THEMIS2   | thymocyte selection associated family member 2                                        | 9473  | 1.258674 | 0.035631 | 0.139481 |
| 209543_s_at | CD34      | CD34 molecule                                                                         | 947   | 1.31764  | 0.037479 | 0.144458 |
| 220952_s_at | PLEKHA5   | pleckstrin homology domain containing, family A member 5                              | 54477 | 1.059186 | 0.039091 | 0.147854 |
| 201448_at   | TIA1      | TIA1 cytotoxic granule-associated RNA binding protein                                 | 7072  | 1.289342 | 0.039105 | 0.147854 |
| 221543_s_at | ERLIN2    | ER lipid raft associated 2                                                            | 11160 | 1.019463 | 0.040859 | 0.150196 |
| 206715_at   | TFEC      | transcription factor EC                                                               | 22797 | 1.291151 | 0.042627 | 0.153844 |
| 220122_at   | MCTP1     | multiple C2 domains, transmembrane 1                                                  | 79772 | 1.025269 | 0.043486 | 0.155532 |
| 209318_x_at | PLAGL1    | pleiomorphic adenoma gene-like 1                                                      | 5325  | 1.315505 | 0.046285 | 0.160061 |
| 208056_s_at | CBFA2T3   | core-binding factor, runt domain, alpha subunit 2; translocated to, 3                 | 863   | 1.116738 | 0.04637  | 0.160061 |
| 204972_at   | OAS2      | 2'-5'-oligoadenylate synthetase 2, 69/71kDa                                           | 4939  | 1.090829 | 0.046707 | 0.160061 |
| 201236_s_at | BTG2      | BTG family, member 2                                                                  | 7832  | 1.091134 | 0.046768 | 0.160061 |
| 214218_s_at | XIST      | X inactive specific transcript (non-protein coding)                                   | 7503  | 1.3244   | 0.04853  | 0.163276 |
| 220940_at   | ANKRD36B  | ankyrin repeat domain 36B                                                             | 57730 | 1.168735 | 0.049352 | 0.163699 |
| 209930_s_at | NFE2      | nuclear factor (erythroid-derived 2), 45kDa                                           | 4778  | 1.331755 | 0.050315 | 0.163699 |
| 205239_at   | AREG      | amphiregulin                                                                          | 374   | 1.205571 | 0.051692 | 0.163838 |
| 217593_at   | ZSCAN18   | zinc finger and SCAN domain containing 18                                             | 65982 | 0.840704 | 0.054078 | 0.167551 |
| 222067_x_at | HIST1H2BD | histone cluster 1, H2bd                                                               | 3017  | 1.198697 | 0.063984 | 0.189566 |
| 213094_at   | GPR126    | G protein-coupled receptor 126                                                        | 57211 | 1.17747  | 0.06522  | 0.191029 |
| 212775_at   | OBSL1     | obscurin-like 1                                                                       | 23363 | 1.331391 | 0.065586 | 0.191029 |
| 221249_s_at | FAM117A   | family with sequence similarity 117, member A                                         | 81558 | 1.637593 | 0.066403 | 0.191029 |
| 210172_at   | SF1       | splicing factor 1                                                                     | 7536  | 0.997588 | 0.067011 | 0.191391 |
| 207496_at   | MS4A2     | membrane-spanning 4-domains, subfamily A, member 2                                    | 2206  | 0.772601 | 0.069284 | 0.193702 |
| 218589_at   | LPAR6     | lysophosphatidic acid receptor 6                                                      | 10161 | 1.080018 | 0.071983 | 0.199841 |
| 204749_at   | NAP1L3    | nucleosome assembly protein 1-like 3                                                  | 4675  | 1.296406 | 0.073554 | 0.202786 |
| 211302_s_at | PDE4B     | phosphodiesterase 4B, cAMP-specific                                                   | 5142  | 0.858839 | 0.076239 | 0.207306 |
| 215779_s_at | HIST1H2BG | histone cluster 1, H2bg                                                               | 8339  | 0.902184 | 0.076987 | 0.207917 |
| 213293_s_at | TRIM22    | tripartite motif containing 22                                                        | 10346 | 1.468514 | 0.077535 | 0.207984 |
| 218352_at   | RCBTB1    | regulator of chromosome condensation (RCC1) and BTB (POZ) domain containing protein 1 | 55213 | 1.08448  | 0.082823 | 0.214891 |
| 220918_at   | RUNX1-IT1 | RUNX1 intronic transcript 1 (non-protein coding)                                      | 80215 | 1.110688 | 0.083008 | 0.214891 |
| 204116_at   | IL2RG     | interleukin 2 receptor, gamma                                                         | 3561  | 0.892953 | 0.085322 | 0.217134 |
| 210254_at   | MS4A3     | membrane-spanning 4-domains, subfamily A, member 3 (hematopoietic cell-specific)      | 932   | 1.032003 | 0.088393 | 0.223517 |

|             |           |                                                                                                |       |          |          |          |
|-------------|-----------|------------------------------------------------------------------------------------------------|-------|----------|----------|----------|
| 213998_s_at | DDX17     | DEAD (Asp-Glu-Ala-Asp) box helicase 17                                                         | 10521 | 1.29709  | 0.090384 | 0.225675 |
| 206631_at   | PTGER2    | prostaglandin E receptor 2 (subtype EP2), 53kDa                                                | 5732  | 0.863461 | 0.094568 | 0.233189 |
| 219737_s_at | PCDH9     | protocadherin 9                                                                                | 5101  | 1.423384 | 0.095952 | 0.235143 |
| 206067_s_at | WT1       | Wilms tumor 1                                                                                  | 7490  | -0.97509 | 0.097098 | 0.235189 |
| 212813_at   | JAM3      | junctional adhesion molecule 3                                                                 | 83700 | 0.851683 | 0.097156 | 0.235189 |
| 203708_at   | PDE4B     | phosphodiesterase 4B, cAMP-specific                                                            | 5142  | 1.258787 | 0.098941 | 0.236778 |
| 213734_at   | WSB2      | WD repeat and SOCS box containing 2                                                            | 55884 | -1.03595 | 0.103178 | 0.243147 |
| 212382_at   | TCF4      | transcription factor 4                                                                         | 6925  | 1.222721 | 0.103506 | 0.243147 |
| 212044_s_at | RPL27A    | ribosomal protein L27a                                                                         | 6157  | -1.30359 | 0.11014  | 0.255203 |
| 209774_x_at | CXCL2     | chemokine (C-X-C motif) ligand 2                                                               | 2920  | -1.35733 | 0.111447 | 0.255748 |
| 204420_at   | FOSL1     | FOS-like antigen 1                                                                             | 8061  | 0.777712 | 0.125065 | 0.28372  |
| 219352_at   | HERC6     | HECT and RLD domain containing E3 ubiquitin protein ligase family member 6                     | 55008 | 0.731325 | 0.126978 | 0.286421 |
| 219371_s_at | KLF2      | Kruppel-like factor 2 (lung)                                                                   | 10365 | 0.952494 | 0.133808 | 0.29512  |
| 208436_s_at | IRF7      | interferon regulatory factor 7                                                                 | 3665  | 0.817301 | 0.142117 | 0.308309 |
| 208490_x_at | HIST1H2BF | histone cluster 1, H2bf                                                                        | 8343  | 0.823714 | 0.153384 | 0.325493 |
| 217168_s_at | HERPUD1   | homocysteine-inducible, endoplasmic reticulum stress-inducible, ubiquitin-like domain member 1 | 9709  | -1.02032 | 0.153554 | 0.325493 |
| 218723_s_at | RGCC      | regulator of cell cycle                                                                        | 28984 | 1.178353 | 0.16831  | 0.347202 |
| 221943_x_at | RPL38     | ribosomal protein L38                                                                          | 6169  | -0.87537 | 0.169666 | 0.347202 |
| 202912_at   | ADM       | adrenomedullin                                                                                 | 133   | -0.90139 | 0.175228 | 0.356746 |
| 202086_at   | MX1       | myxovirus (influenza virus) resistance 1, interferon-inducible protein p78 (mouse)             | 4599  | 1.082812 | 0.179388 | 0.362009 |
| 204794_at   | DUSP2     | dual specificity phosphatase 2                                                                 | 1844  | -1.05607 | 0.185851 | 0.370769 |
| 200878_at   | EPAS1     | endothelial PAS domain protein 1                                                               | 2034  | -0.94127 | 0.187138 | 0.371469 |
| 214395_x_at | EEF1D     | eukaryotic translation elongation factor 1 delta (guanine nucleotide exchange protein)         | 1936  | -0.75421 | 0.221404 | 0.418581 |
| 39248_at    | AQP3      | aquaporin 3 (Gill blood group)                                                                 | 360   | -1.0387  | 0.221416 | 0.418581 |
| 201590_x_at | ANXA2     | annexin A2                                                                                     | 302   | -0.83364 | 0.224539 | 0.422475 |
| 202087_s_at | CTSL1     | cathepsin L1                                                                                   | 1514  | -0.72277 | 0.227535 | 0.426091 |
| 201897_s_at | CKS1B     | CDC28 protein kinase regulatory subunit 1B                                                     | 1163  | -0.75777 | 0.23559  | 0.436077 |
| 202869_at   | OAS1      | 2'-5'-oligoadenylate synthetase 1, 40/46kDa                                                    | 4938  | 0.645604 | 0.239395 | 0.44     |
| 204351_at   | S100P     | S100 calcium binding protein P                                                                 | 6286  | -1.19041 | 0.248298 | 0.447645 |
| 205220_at   | HCAR3     | hydroxycarboxylic acid receptor 3                                                              | 8843  | -0.75269 | 0.248929 | 0.447645 |
| 201289_at   | CYR61     | cysteine-rich, angiogenic inducer, 61                                                          | 3491  | -0.94996 | 0.249241 | 0.447645 |



|             |         |                                                                                                                            |        |          |          |          |
|-------------|---------|----------------------------------------------------------------------------------------------------------------------------|--------|----------|----------|----------|
| 213943_at   | TWIST1  | twist basic helix-loop-helix transcription factor 1 inhibitor of DNA binding 2, dominant negative helix-loop-helix protein | 7291   | -0.76051 | 0.251394 | 0.447645 |
| 201566_x_at | ID2     | inhibitor of DNA binding 2, dominant negative helix-loop-helix protein                                                     | 3398   | 0.738645 | 0.252916 | 0.448249 |
| 204286_s_at | PMAIP1  | phorbol-12-myristate-13-acetate-induced protein 1                                                                          | 5366   | 0.658217 | 0.254968 | 0.449876 |
| 203038_at   | PTPRK   | protein tyrosine phosphatase, receptor type, K                                                                             | 5796   | -0.89732 | 0.259282 | 0.450102 |
| 212097_at   | CAV1    | caveolin 1, caveolae protein, 22kDa                                                                                        | 857    | -0.8953  | 0.259704 | 0.450102 |
| 202733_at   | P4HA2   | prolyl 4-hydroxylase, alpha polypeptide II                                                                                 | 8974   | -0.88547 | 0.260765 | 0.450102 |
| 203917_at   | CXADR   | coxsackie virus and adenovirus receptor                                                                                    | 1525   | -0.70323 | 0.261975 | 0.450233 |
| 204103_at   | CCL4    | chemokine (C-C motif) ligand 4                                                                                             | 6351   | -0.93799 | 0.264919 | 0.453331 |
| 202458_at   | PRSS23  | protease, serine, 23                                                                                                       | 11098  | -0.75062 | 0.266945 | 0.454838 |
| 213539_at   | CD3D    | CD3d molecule, delta (CD3-TCR complex)                                                                                     | 915    | -0.74368 | 0.268679 | 0.455836 |
| 210321_at   | GZMH    | granzyme H (cathepsin G-like 2, protein h-CCPX)                                                                            | 2999   | -0.6763  | 0.279967 | 0.472525 |
| 214453_s_at | IFI44   | interferon-induced protein 44                                                                                              | 10561  | 0.80743  | 0.280897 | 0.472525 |
| 211560_s_at | ALAS2   | aminolevulinatase, delta-, synthase 2                                                                                      | 212    | -0.96058 | 0.293731 | 0.486931 |
| 201744_s_at | LUM     | lumican                                                                                                                    | 4060   | -0.72481 | 0.298238 | 0.491288 |
| 211340_s_at | MCAM    | melanoma cell adhesion molecule                                                                                            | 4162   | -0.77567 | 0.306814 | 0.499201 |
| 204959_at   | MNDA    | myeloid cell nuclear differentiation antigen                                                                               | 4332   | -0.90022 | 0.316701 | 0.504456 |
| 202587_s_at | AK1     | adenylate kinase 1                                                                                                         | 203    | -0.63641 | 0.317949 | 0.504456 |
| 218959_at   | HOXC10  | homeobox C10                                                                                                               | 3226   | -0.61573 | 0.319085 | 0.504456 |
| 205495_s_at | GNLY    | granulysin                                                                                                                 | 10578  | -0.68517 | 0.320209 | 0.504456 |
| 221958_s_at | WLS     | wntless homolog (Drosophila)                                                                                               | 79971  | -0.70884 | 0.324929 | 0.50696  |
| 202688_at   | TNFSF10 | tumor necrosis factor (ligand) superfamily, member 10                                                                      | 8743   | 0.618043 | 0.325629 | 0.50696  |
| 209087_x_at | MCAM    | melanoma cell adhesion molecule                                                                                            | 4162   | -0.81432 | 0.326954 | 0.507034 |
| 209210_s_at | FERMT2  | fermitin family member 2                                                                                                   | 10979  | -1.11824 | 0.329723 | 0.50854  |
| 205488_at   | GZMA    | granzyme A (granzyme 1, cytotoxic T-lymphocyte-associated serine esterase 3)                                               | 3001   | -0.59006 | 0.330487 | 0.50854  |
| 201739_at   | SGK1    | serum/glucocorticoid regulated kinase 1                                                                                    | 6446   | -1.0293  | 0.335357 | 0.508988 |
| 211506_s_at | IL8     | interleukin 8                                                                                                              | 3576   | -0.69682 | 0.336251 | 0.508988 |
| 204962_s_at | CENPA   | centromere protein A                                                                                                       | 1058   | -0.67424 | 0.336317 | 0.508988 |
| 212698_s_at | 10-Sep  | septin 10                                                                                                                  | 151011 | -0.74724 | 0.337188 | 0.508988 |
| 33322_i_at  | SFN     | stratifin                                                                                                                  | 2810   | -0.75401 | 0.341463 | 0.509458 |
| 218705_s_at | SNX24   | sorting nexin 24                                                                                                           | 28966  | -0.57987 | 0.342374 | 0.509458 |
| 205552_s_at | OAS1    | 2'-5'-oligoadenylate synthetase 1, 40/46kDa                                                                                | 4938   | 0.50836  | 0.344124 | 0.509458 |
| 201506_at   | TGFBI   | transforming growth factor, beta-induced, 68kDa                                                                            | 7045   | -0.66233 | 0.345804 | 0.509458 |

|             |         |                                                                   |        |          |          |          |
|-------------|---------|-------------------------------------------------------------------|--------|----------|----------|----------|
| 202011_at   | TJP1    | tight junction protein 1                                          | 7082   | -0.64431 | 0.347774 | 0.509458 |
| 204517_at   | PPIC    | peptidylprolyl isomerase C (cyclophilin C)                        | 5480   | -0.59936 | 0.349374 | 0.509458 |
| 209230_s_at | NUPR1   | nuclear protein, transcriptional regulator, 1                     | 26471  | -0.65323 | 0.350449 | 0.509458 |
| 219073_s_at | OSBP10  | oxysterol binding protein-like 10                                 | 114884 | -0.59261 | 0.351262 | 0.509458 |
| 205476_at   | CCL20   | chemokine (C-C motif) ligand 20                                   | 6364   | -0.6399  | 0.357651 | 0.512993 |
| 221577_x_at | GDF15   | growth differentiation factor 15                                  | 9518   | -0.65491 | 0.364519 | 0.516042 |
| 202718_at   | IGFBP2  | insulin-like growth factor binding protein 2, 36kDa               | 3485   | -0.57195 | 0.365259 | 0.516042 |
| 207039_at   | CDKN2A  | cyclin-dependent kinase inhibitor 2A                              | 1029   | -0.71306 | 0.36807  | 0.517873 |
| 204920_at   | CPS1    | carbamoyl-phosphate synthase 1, mitochondrial                     | 1373   | -0.81774 | 0.369164 | 0.517873 |
| 200771_at   | LAMC1   | laminin, gamma 1 (formerly LAMB2)                                 | 3915   | -0.65676 | 0.37062  | 0.518085 |
| 219454_at   | EGFL6   | EGF-like-domain, multiple 6                                       | 25975  | -0.56974 | 0.374512 | 0.518966 |
| 212328_at   | LIMCH1  | LIM and calponin homology domains 1                               | 22998  | -0.72538 | 0.37555  | 0.518966 |
| 207076_s_at | ASS1    | argininosuccinate synthase 1                                      | 445    | -0.96506 | 0.376479 | 0.518966 |
| 201983_s_at | EGFR    | epidermal growth factor receptor                                  | 1956   | -0.56631 | 0.379717 | 0.519326 |
| 203438_at   | STC2    | stanniocalcin 2                                                   | 8614   | -0.54868 | 0.385726 | 0.520981 |
| 212012_at   | PXDN    | peroxidasin homolog (Drosophila)                                  | 7837   | -0.69905 | 0.3859   | 0.520981 |
| 203153_at   | IFIT1   | interferon-induced protein with tetratricopeptide repeats 1       | 3434   | 0.55537  | 0.389138 | 0.520981 |
| 206785_s_at | KLRC1   | killer cell lectin-like receptor subfamily C, member 1            | 3821   | -0.5784  | 0.393476 | 0.520981 |
| 217564_s_at | CPS1    | carbamoyl-phosphate synthase 1, mitochondrial                     | 1373   | -0.79731 | 0.394672 | 0.520981 |
| 202052_s_at | RAI14   | retinoic acid induced 14                                          | 26064  | -0.5724  | 0.3967   | 0.520981 |
| 204992_s_at | PFN2    | profilin 2                                                        | 5217   | -0.772   | 0.396957 | 0.520981 |
| 204007_at   | FCGR3B  | Fc fragment of IgG, low affinity IIIb, receptor (CD16b)           | 2215   | -0.64158 | 0.397187 | 0.520981 |
| 210095_s_at | IGFBP3  | insulin-like growth factor binding protein 3                      | 3486   | -0.60033 | 0.397625 | 0.520981 |
| 200798_x_at | MCL1    | myeloid cell leukemia sequence 1 (BCL2-related)                   | 4170   | 0.540947 | 0.39956  | 0.521124 |
| 212364_at   | MYO1B   | myosin IB                                                         | 4430   | -0.55526 | 0.401476 | 0.521124 |
| 212765_at   | CAMSAP2 | calmodulin regulated spectrin-associated protein family, member 2 | 23271  | -0.56269 | 0.401672 | 0.521124 |
| 204284_at   | PPP1R3C | protein phosphatase 1, regulatory subunit 3C                      | 5507   | -0.54464 | 0.406184 | 0.523753 |
| 201976_s_at | MYO10   | myosin X                                                          | 4651   | -0.55951 | 0.406337 | 0.523753 |
| 208079_s_at | AURKA   | aurora kinase A                                                   | 6790   | -0.65513 | 0.408025 | 0.524226 |
| 219959_at   | MOCOS   | molybdenum cofactor sulfurase                                     | 55034  | -0.85667 | 0.410521 | 0.525731 |
| 213139_at   | SNAI2   | snail homolog 2 (Drosophila)                                      | 6591   | -0.55315 | 0.414603 | 0.526676 |
| 201292_at   | TOP2A   | topoisomerase (DNA) II alpha 170kDa                               | 7153   | -0.61773 | 0.41473  | 0.526676 |
| 209101_at   | CTGF    | connective tissue growth factor                                   | 1490   | -0.63969 | 0.416358 | 0.526676 |

|             |          |                                                                                             |       |          |          |          |
|-------------|----------|---------------------------------------------------------------------------------------------|-------|----------|----------|----------|
| 210587_at   | INHBE    | inhibin, beta E                                                                             | 83729 | -0.61908 | 0.419791 | 0.526676 |
| 202768_at   | FOSB     | FBJ murine osteosarcoma viral oncogene homolog B                                            | 2354  | 0.785327 | 0.421407 | 0.526676 |
| 219148_at   | PBK      | PDZ binding kinase                                                                          | 55872 | -0.62389 | 0.422616 | 0.526676 |
| 201505_at   | LAMB1    | laminin, beta 1                                                                             | 3912  | -0.59203 | 0.422812 | 0.526676 |
| 204439_at   | IFI44L   | interferon-induced protein 44-like                                                          | 10964 | 0.779572 | 0.423198 | 0.526676 |
| 204688_at   | SGCE     | sarcoglycan, epsilon                                                                        | 8910  | -0.53807 | 0.427632 | 0.530004 |
| 210274_at   | MAGEA8   | melanoma antigen family A, 8                                                                | 4107  | -0.55437 | 0.440077 | 0.53411  |
| 218400_at   | OAS3     | 2'-5'-oligoadenylate synthetase 3, 100kDa                                                   | 4940  | 0.401878 | 0.441825 | 0.53411  |
| 204033_at   | TRIP13   | thyroid hormone receptor interactor 13                                                      | 9319  | -0.53242 | 0.443536 | 0.53411  |
| 205033_s_at | DEFA1    | defensin, alpha 1                                                                           | 1667  | -0.68446 | 0.443688 | 0.53411  |
| 209921_at   | SLC7A11  | solute carrier family 7 (anionic amino acid transporter light chain, xc- system), member 11 | 23657 | -0.67363 | 0.443971 | 0.53411  |
| 204415_at   | IFI6     | interferon, alpha-inducible protein 6                                                       | 2537  | 0.448113 | 0.446822 | 0.53412  |
| 203510_at   | MET      | met proto-oncogene (hepatocyte growth factor receptor)                                      | 4233  | -0.59266 | 0.449267 | 0.53412  |
| 33323_r_at  | SFN      | stratifin                                                                                   | 2810  | -0.63466 | 0.450623 | 0.53412  |
| 212671_s_at | HLA-DQA1 | major histocompatibility complex, class II, DQ alpha 1                                      | 3117  | -0.73617 | 0.45086  | 0.53412  |
| 205047_s_at | ASNS     | asparagine synthetase (glutamine-hydrolyzing)                                               | 440   | -0.62208 | 0.454871 | 0.534967 |
| 200606_at   | DSP      | desmoplakin                                                                                 | 1832  | -0.6615  | 0.455463 | 0.534967 |
| 205573_s_at | SNX7     | sorting nexin 7                                                                             | 51375 | -0.50744 | 0.460196 | 0.538931 |
| 204684_at   | NPTX1    | neuronal pentraxin I                                                                        | 4884  | -0.48978 | 0.463571 | 0.540181 |
| 204483_at   | ENO3     | enolase 3 (beta, muscle)                                                                    | 2027  | -0.57582 | 0.463984 | 0.540181 |
| 221008_s_at | AGXT2L1  | alanine-glyoxylate aminotransferase 2-like 1                                                | 64850 | -0.59789 | 0.471814 | 0.545637 |
| 200795_at   | SPARCL1  | SPARC-like 1 (hevin)                                                                        | 8404  | -0.50481 | 0.475562 | 0.546517 |
| 211618_s_at | ALPI     | alkaline phosphatase, intestinal                                                            | 248   | -0.48827 | 0.477352 | 0.546517 |
| 207140_at   | ALPI     | alkaline phosphatase, intestinal                                                            | 248   | -0.90959 | 0.477868 | 0.546517 |
| 204288_s_at | SORBS2   | sorbin and SH3 domain containing 2                                                          | 8470  | -0.52462 | 0.481567 | 0.546517 |
| 201681_s_at | DLG5     | discs, large homolog 5 (Drosophila)                                                         | 9231  | -0.47202 | 0.48294  | 0.546517 |
| 203881_s_at | DMD      | dystrophin                                                                                  | 1756  | -0.49504 | 0.483193 | 0.546517 |
| 219599_at   | EIF4B    | eukaryotic translation initiation factor 4B                                                 | 1975  | -0.53684 | 0.487369 | 0.548489 |
| 203636_at   | MID1     | midline 1 (Opitz/BBB syndrome)                                                              | 4281  | -0.45754 | 0.488315 | 0.548489 |
| 214240_at   | GAL      | galanin/GMAP prepropeptide                                                                  | 51083 | -0.50116 | 0.489081 | 0.548489 |
| 209094_at   | DDAH1    | dimethylarginine dimethylaminohydrolase 1                                                   | 23576 | -0.51772 | 0.495452 | 0.554068 |
| 218631_at   | AVPI1    | arginine vasopressin-induced 1                                                              | 60370 | -0.49809 | 0.500208 | 0.556142 |
| 204540_at   | EEF1A2   | eukaryotic translation elongation factor 1 alpha 2                                          | 1917  | -0.42637 | 0.500471 | 0.556142 |

|             |         |                                                                               |       |          |          |          |
|-------------|---------|-------------------------------------------------------------------------------|-------|----------|----------|----------|
| 210016_at   | MYT1L   | myelin transcription factor 1-like                                            | 23040 | -0.55739 | 0.502376 | 0.556142 |
| 205289_at   | BMP2    | bone morphogenetic protein 2                                                  | 650   | -0.51385 | 0.50342  | 0.556142 |
| 205751_at   | SH3GL2  | SH3-domain GRB2-like 2                                                        | 6456  | -0.43617 | 0.50431  | 0.556142 |
| 218541_s_at | C8orf4  | chromosome 8 open reading frame 4                                             | 56892 | -0.52893 | 0.509174 | 0.559951 |
| 214247_s_at | DKK3    | dickkopf 3 homolog (Xenopus laevis)                                           | 27122 | -0.51465 | 0.511216 | 0.560643 |
| 214212_x_at | FERMT2  | fermitin family member 2                                                      | 10979 | -0.44903 | 0.514141 | 0.562297 |
| 208209_s_at | C4BPB   | complement component 4 binding protein, beta                                  | 725   | -0.49739 | 0.518251 | 0.565235 |
| 208396_s_at | PDE1A   | phosphodiesterase 1A, calmodulin-dependent                                    | 5136  | -0.46854 | 0.526142 | 0.571827 |
| 209942_x_at | MAGEA3  | melanoma antigen family A, 3                                                  | 4102  | -0.58148 | 0.5289   | 0.572135 |
| 214612_x_at | MAGEA6  | melanoma antigen family A, 6                                                  | 4105  | -0.60458 | 0.532798 | 0.57304  |
| 201660_at   | ACSL3   | acyl-CoA synthetase long-chain family member 3                                | 2181  | -0.42544 | 0.533497 | 0.57304  |
| 204975_at   | EMP2    | epithelial membrane protein 2                                                 | 2013  | -0.47324 | 0.536232 | 0.57304  |
| 201667_at   | GJA1    | gap junction protein, alpha 1, 43kDa                                          | 2697  | -0.55978 | 0.536604 | 0.57304  |
| 201291_s_at | TOP2A   | topoisomerase (DNA) II alpha 170kDa                                           | 7153  | -0.51625 | 0.536954 | 0.57304  |
| 204653_at   | TFAP2A  | transcription factor AP-2 alpha (activating enhancer binding protein 2 alpha) | 7020  | -0.43406 | 0.544838 | 0.579895 |
| 205132_at   | ACTC1   | actin, alpha, cardiac muscle 1                                                | 70    | -0.38632 | 0.55232  | 0.584901 |
| 217127_at   | CTH     | cystathionase (cystathionine gamma-lyase)                                     | 1491  | -0.44229 | 0.552489 | 0.584901 |
| 205381_at   | LRRC17  | leucine rich repeat containing 17                                             | 10234 | -0.39955 | 0.554073 | 0.585019 |
| 209967_s_at | CREM    | cAMP responsive element modulator                                             | 1390  | -0.45103 | 0.557616 | 0.587198 |
| 202672_s_at | ATF3    | activating transcription factor 3                                             | 467   | 0.490404 | 0.560082 | 0.587586 |
| 209631_s_at | GPR37   | G protein-coupled receptor 37 (endothelin receptor type B-like)               | 2861  | -0.44217 | 0.560945 | 0.587586 |
| 221730_at   | COL5A2  | collagen, type V, alpha 2                                                     | 1290  | -0.40443 | 0.562469 | 0.587632 |
| 210467_x_at | MAGEA12 | melanoma antigen family A, 12                                                 | 4111  | -0.46503 | 0.566943 | 0.590752 |
| 203083_at   | THBS2   | thrombospondin 2                                                              | 7058  | -0.37936 | 0.569007 | 0.59135  |
| 215034_s_at | TM4SF1  | transmembrane 4 L six family member 1                                         | 4071  | -0.4484  | 0.571318 | 0.592202 |
| 206377_at   | FOXF2   | forkhead box F2                                                               | 2295  | -0.36443 | 0.585328 | 0.605143 |
| 213131_at   | OLFM1   | olfactomedin 1                                                                | 10439 | -0.35953 | 0.610643 | 0.629676 |
| 202976_s_at | RHOBTB3 | Rho-related BTB domain containing 3                                           | 22836 | -0.3467  | 0.614674 | 0.63219  |
| 202887_s_at | DDIT4   | DNA-damage-inducible transcript 4                                             | 54541 | -0.45548 | 0.618537 | 0.63452  |
| 203984_s_at | CASP9   | caspase 9, apoptosis-related cysteine peptidase                               | 842   | -0.35376 | 0.632586 | 0.647259 |
| 205290_s_at | BMP2    | bone morphogenetic protein 2                                                  | 650   | -0.47882 | 0.640799 | 0.653977 |
| 204337_at   | RGS4    | regulator of G-protein signaling 4                                            | 5999  | -0.26477 | 0.708833 | 0.717874 |

|             |        |                                                    |       |          |          |          |
|-------------|--------|----------------------------------------------------|-------|----------|----------|----------|
| 217867_x_at | BACE2  | beta-site APP-cleaving enzyme 2                    | 25825 | -0.2906  | 0.71423  | 0.721499 |
| 212327_at   | LIMCH1 | LIM and calponin homology domains 1                | 22998 | -0.28139 | 0.723086 | 0.728591 |
| 202391_at   | BASP1  | brain abundant, membrane attached signal protein 1 | 10409 | 0.338672 | 0.73503  | 0.738752 |

Table S2b. Genes differentially regulated by male PV patients compared to normal male controls.

| <i>Probeset ID</i> | <i>Symbol (Na32 consensus Mar13)</i> | <i>Gene Title (Na32 consensus Mar13)</i>                                                                                                      | <i>Entrez GeneID (consensus Mar-13)</i> | <i>Log2(FC)</i> | <i>P-Value</i> | <i>Adjusted p-Value</i> |
|--------------------|--------------------------------------|-----------------------------------------------------------------------------------------------------------------------------------------------|-----------------------------------------|-----------------|----------------|-------------------------|
| 208730_x_at        | RAB2A                                | RAB2A, member RAS oncogene family                                                                                                             | 5862                                    | -2.23913        | 0.00173        | 0.22461                 |
| 201242_s_at        | ATP1B1                               | ATPase, Na <sup>+</sup> /K <sup>+</sup> transporting, beta 1 polypeptide                                                                      | 481                                     | -2.30995        | 0.001936       | 0.22461                 |
| 206857_s_at        | FKBP1B                               | FK506 binding protein 1B, 12.6 kDa                                                                                                            | 2281                                    | -2.18904        | 0.003742       | 0.22461                 |
| 208636_at          | ACTN1                                | actinin, alpha 1                                                                                                                              | 87                                      | -1.91968        | 0.005679       | 0.22461                 |
| 206493_at          | ITGA2B                               | integrin, alpha 2b (platelet glycoprotein IIb of IIb/IIIa complex, antigen CD41)                                                              | 3674                                    | -2.94275        | 0.006689       | 0.22461                 |
| 211986_at          | AHNAK                                | AHNAK nucleoprotein                                                                                                                           | 79026                                   | 1.54422         | 0.00875        | 0.22461                 |
| 203509_at          | SORL1                                | sortilin-related receptor, L(DLR class) A repeats containing integrin, alpha 2b (platelet glycoprotein IIb of IIb/IIIa complex, antigen CD41) | 6653                                    | 1.561462        | 0.009157       | 0.22461                 |
| 206494_s_at        | ITGA2B                               | integrin, alpha 2b (platelet glycoprotein IIb of IIb/IIIa complex, antigen CD41)                                                              | 3674                                    | -3.20741        | 0.009481       | 0.22461                 |
| 201846_s_at        | RYBP                                 | RING1 and YY1 binding protein                                                                                                                 | 23429                                   | -1.62523        | 0.009701       | 0.22461                 |
| 213229_at          | DICER1                               | dicer 1, ribonuclease type III                                                                                                                | 23405                                   | -1.70923        | 0.010255       | 0.22461                 |
| 202620_s_at        | PLOD2                                | procollagen-lysine, 2-oxoglutarate 5-dioxygenase 2                                                                                            | 5352                                    | -1.86792        | 0.010535       | 0.22461                 |
| 202760_s_at        | AKAP2                                | A kinase (PRKA) anchor protein 2                                                                                                              | 11217                                   | -1.66558        | 0.010984       | 0.22461                 |
| 215813_s_at        | PTGS1                                | prostaglandin-endoperoxide synthase 1 (prostaglandin G/H synthase and cyclooxygenase)                                                         | 5742                                    | -2.12304        | 0.011371       | 0.22461                 |
| 219054_at          | NPR3                                 | natriuretic peptide receptor C/guanylate cyclase C (atrionatriuretic peptide receptor C)                                                      | 4883                                    | 1.815762        | 0.012117       | 0.22461                 |
| 37462_i_at         | SF3A2                                | splicing factor 3a, subunit 2, 66kDa                                                                                                          | 8175                                    | -1.73475        | 0.01271        | 0.22461                 |
| 212266_s_at        | SRSF5                                | serine/arginine-rich splicing factor 5                                                                                                        | 6430                                    | 1.814328        | 0.012914       | 0.22461                 |
| 201489_at          | PPIF                                 | peptidylprolyl isomerase F                                                                                                                    | 10105                                   | -1.57807        | 0.013197       | 0.22461                 |
| 203096_s_at        | RAPGEF2                              | Rap guanine nucleotide exchange factor (GEF) 2                                                                                                | 9693                                    | -1.90184        | 0.013308       | 0.22461                 |
| 205128_x_at        | PTGS1                                | prostaglandin-endoperoxide synthase 1 (prostaglandin G/H synthase and cyclooxygenase)                                                         | 5742                                    | -1.98263        | 0.013941       | 0.22461                 |
| 221059_s_at        | COTL1                                | coactosin-like 1 (Dictyostelium)                                                                                                              | 23406                                   | -2.38475        | 0.014419       | 0.22461                 |
| 212268_at          | SERPINB1                             | serpin peptidase inhibitor, clade B (ovalbumin), member 1                                                                                     | 1992                                    | 1.576065        | 0.015209       | 0.22461                 |
| 201012_at          | ANXA1                                | annexin A1                                                                                                                                    | 301                                     | 1.431866        | 0.015821       | 0.22461                 |

|             |           |                                                             |       |          |          |         |
|-------------|-----------|-------------------------------------------------------------|-------|----------|----------|---------|
| 207808_s_at | PROS1     | protein S (alpha)                                           | 5627  | -2.54684 | 0.01834  | 0.22461 |
| 206302_s_at | NUDT4     | nudix (nucleoside diphosphate linked moiety X)-type motif 4 | 11163 | -1.35819 | 0.01853  | 0.22461 |
| 203320_at   | SH2B3     | SH2B adaptor protein 3                                      | 10019 | -1.48125 | 0.019452 | 0.22461 |
| 205647_at   | RAD52     | RAD52 homolog ( <i>S. cerevisiae</i> )                      | 5893  | 1.244884 | 0.019524 | 0.22461 |
| 210105_s_at | FYN       | FYN oncogene related to SRC, FGR, YES                       | 2534  | -1.57809 | 0.020057 | 0.22461 |
| 200598_s_at | HSP90B1   | heat shock protein 90kDa beta (Grp94), member 1             | 7184  | -1.77815 | 0.020317 | 0.22461 |
| 200964_at   | UBA1      | ubiquitin-like modifier activating enzyme 1                 | 7317  | -1.39778 | 0.020397 | 0.22461 |
| 221493_at   | TSPYL1    | TSPY-like 1                                                 | 7259  | 1.744517 | 0.021178 | 0.22461 |
| 206174_s_at | PPP6C     | protein phosphatase 6, catalytic subunit                    | 5537  | -1.35248 | 0.021364 | 0.22461 |
| 202284_s_at | CDKN1A    | cyclin-dependent kinase inhibitor 1A (p21, Cip1)            | 1026  | -2.00033 | 0.023319 | 0.22461 |
| 206207_at   | CLC       | Charcot-Leyden crystal protein                              | 1178  | -1.88811 | 0.023511 | 0.22461 |
| 206655_s_at | GP1BB     | glycoprotein Ib (platelet), beta polypeptide                | 2812  | -2.92989 | 0.023514 | 0.22461 |
| 206571_s_at | MAP4K4    | mitogen-activated protein kinase kinase kinase 4            | 9448  | -1.25865 | 0.02388  | 0.22461 |
| 209651_at   | TGFB1I1   | transforming growth factor beta 1 induced transcript 1      | 7041  | -2.18243 | 0.024567 | 0.22461 |
| 204689_at   | HHEX      | hematopoietically expressed homeobox                        | 3087  | 1.462027 | 0.024863 | 0.22461 |
| 205067_at   | IL1B      | interleukin 1, beta                                         | 3553  | 1.255404 | 0.025653 | 0.22461 |
| 203380_x_at | SRSF5     | serine/arginine-rich splicing factor 5                      | 6430  | 1.503237 | 0.025756 | 0.22461 |
| 200923_at   | LGALS3BP  | lectin, galactoside-binding, soluble, 3 binding protein     | 3959  | -1.56076 | 0.025836 | 0.22461 |
| 202949_s_at | FHL2      | four and a half LIM domains 2                               | 2274  | -1.37209 | 0.026399 | 0.22461 |
| 201695_s_at | PNP       | purine nucleoside phosphorylase                             | 4860  | -1.41068 | 0.026458 | 0.22461 |
| 220748_s_at | ZNF580    | zinc finger protein 580                                     | 51157 | -1.34215 | 0.028123 | 0.22461 |
| 217901_at   | DSG2      | desmoglein 2                                                | 1829  | 1.320976 | 0.028803 | 0.22461 |
| 219798_s_at | MEPCE     | methylphosphate capping enzyme                              | 56257 | -1.33001 | 0.029245 | 0.22461 |
| 209381_x_at | SF3A2     | splicing factor 3a, subunit 2, 66kDa                        | 8175  | -1.41034 | 0.029259 | 0.22461 |
| 204222_s_at | GLIPR1    | GLI pathogenesis-related 1                                  | 11010 | 1.439903 | 0.030437 | 0.22461 |
| 221004_s_at | ITM2C     | integral membrane protein 2C                                | 81618 | 1.219859 | 0.030753 | 0.22461 |
| 206049_at   | SELP      | selectin P (granule membrane protein 140kDa, antigen CD62)  | 6403  | -2.17111 | 0.031111 | 0.22461 |
| 37966_at    | PARVB     | parvin, beta                                                | 29780 | -2.06542 | 0.031383 | 0.22461 |
| 219681_s_at | RAB11FIP1 | RAB11 family interacting protein 1 (class I)                | 80223 | -1.35248 | 0.031529 | 0.22461 |
| 212242_at   | TUBA4A    | tubulin, alpha 4a                                           | 7277  | -2.39641 | 0.03153  | 0.22461 |
| 218237_s_at | SLC38A1   | solute carrier family 38, member 1                          | 81539 | 1.547237 | 0.032294 | 0.22461 |
| 213726_x_at | TUBB4B    | tubulin, beta 4B class IVb                                  | 10383 | -1.30164 | 0.032486 | 0.22461 |
| 39402_at    | IL1B      | interleukin 1, beta                                         | 3553  | 1.235287 | 0.032639 | 0.22461 |
| 209820_s_at | TBL3      | transducin (beta)-like 3                                    | 10607 | -1.20712 | 0.032649 | 0.22461 |

|             |         |                                                                           |       |          |          |         |
|-------------|---------|---------------------------------------------------------------------------|-------|----------|----------|---------|
| 212312_at   | BCL2L1  | BCL2-like 1                                                               | 598   | -1.39562 | 0.033632 | 0.22461 |
| 211600_at   | PTPRO   | protein tyrosine phosphatase, receptor type, O                            | 5800  | -1.45225 | 0.03416  | 0.22461 |
| 214783_s_at | ANXA11  | annexin A11                                                               | 311   | -1.22688 | 0.034175 | 0.22461 |
| 200616_s_at | MLEC    | malectin                                                                  | 9761  | -1.20495 | 0.034386 | 0.22461 |
| 211926_s_at | MYH9    | myosin, heavy chain 9, non-muscle                                         | 4627  | -1.2641  | 0.034926 | 0.22461 |
| 202059_s_at | KPNA1   | karyopherin alpha 1 (importin alpha 5)                                    | 3836  | -1.12248 | 0.034962 | 0.22461 |
| 221899_at   | N4BP2L2 | NEDD4 binding protein 2-like 2                                            | 10443 | 1.316587 | 0.035008 | 0.22461 |
| 210347_s_at | BCL11A  | B-cell CLL/lymphoma 11A (zinc finger protein)                             | 53335 | 1.273905 | 0.035019 | 0.22461 |
| 221748_s_at | TNS1    | tensin 1                                                                  | 7145  | -1.4894  | 0.035747 | 0.22461 |
| 203940_s_at | VASH1   | vasohibin 1                                                               | 22846 | -1.35628 | 0.037032 | 0.22461 |
| 204610_s_at | CCDC85B | coiled-coil domain containing 85B                                         | 11007 | -1.5951  | 0.037663 | 0.22461 |
| 222231_s_at | LRRC59  | leucine rich repeat containing 59                                         | 55379 | -1.11855 | 0.038092 | 0.22461 |
| 212177_at   | PNISR   | PNN-interacting serine/arginine-rich protein                              | 25957 | 1.175547 | 0.038211 | 0.22461 |
| 201692_at   | SIGMAR1 | sigma non-opioid intracellular receptor 1                                 | 10280 | -1.06876 | 0.038307 | 0.22461 |
| 202112_at   | VWF     | von Willebrand factor                                                     | 7450  | -1.36382 | 0.039327 | 0.22461 |
| 206310_at   | SPINK2  | serine peptidase inhibitor, Kazal type 2 (acrosin-trypsin inhibitor)      | 6691  | 1.568851 | 0.039466 | 0.22461 |
| 218899_s_at | BAALC   | brain and acute leukemia, cytoplasmic                                     | 79870 | 1.51143  | 0.039771 | 0.22461 |
| 208308_s_at | GPI     | glucose-6-phosphate isomerase                                             | 2821  | -1.24247 | 0.040139 | 0.22461 |
| 221834_at   | LONP2   | lon peptidase 2, peroxisomal                                              | 83752 | 1.261036 | 0.040303 | 0.22461 |
| 210719_s_at | HMG20B  | high mobility group 20B                                                   | 10362 | -1.39762 | 0.040525 | 0.22461 |
| 200808_s_at | ZYX     | zyxin                                                                     | 7791  | -1.54764 | 0.041293 | 0.22461 |
| 209945_s_at | GSK3B   | glycogen synthase kinase 3 beta                                           | 2932  | -1.28118 | 0.041713 | 0.22461 |
| 208637_x_at | ACTN1   | actinin, alpha 1                                                          | 87    | -1.74284 | 0.041994 | 0.22461 |
| 209088_s_at | UBN1    | ubiquitin 1                                                               | 29855 | -1.14187 | 0.042143 | 0.22461 |
| 211005_at   | LAT     | linker for activation of T cells                                          | 27040 | -1.83145 | 0.042364 | 0.22461 |
| 218131_s_at | GATAD2A | GATA zinc finger domain containing 2A                                     | 54815 | -1.22531 | 0.042653 | 0.22461 |
| 202729_s_at | LTBP1   | latent transforming growth factor beta binding protein 1                  | 4052  | -1.87245 | 0.042694 | 0.22461 |
| 219357_at   | GTPBP1  | GTP binding protein 1                                                     | 9567  | -1.11964 | 0.042776 | 0.22461 |
| 201980_s_at | RSU1    | Ras suppressor protein 1                                                  | 6251  | -1.33636 | 0.043967 | 0.22461 |
| 211671_s_at | NR3C1   | nuclear receptor subfamily 3, group C, member 1 (glucocorticoid receptor) | 2908  | 1.257541 | 0.044183 | 0.22461 |
| 203007_x_at | LYPLA1  | lysophospholipase I                                                       | 10434 | -1.24485 | 0.04487  | 0.22461 |
| 210299_s_at | FHL1    | four and a half LIM domains 1                                             | 2273  | 1.459962 | 0.045279 | 0.22461 |



|             |          |                                                                         |       |          |          |         |
|-------------|----------|-------------------------------------------------------------------------|-------|----------|----------|---------|
| 210783_x_at | CLEC11A  | C-type lectin domain family 11, member A                                | 6320  | -1.14617 | 0.045531 | 0.22461 |
| 209154_at   | TAX1BP3  | Tax1 (human T-cell leukemia virus type I) binding protein 3             | 30851 | -1.80171 | 0.045558 | 0.22461 |
| 212279_at   | TMEM97   | transmembrane protein 97                                                | 27346 | -1.20825 | 0.046373 | 0.22461 |
| 202102_s_at | BRD4     | bromodomain containing 4                                                | 23476 | -1.31832 | 0.046377 | 0.22461 |
| 200719_at   | SKP1     | S-phase kinase-associated protein 1                                     | 6500  | -1.18511 | 0.046416 | 0.22461 |
| 213416_at   | ITGA4    | integrin, alpha 4 (antigen CD49D, alpha 4 subunit of VLA-4 receptor)    | 3676  | 1.500306 | 0.046971 | 0.22461 |
| 201251_at   | PKM      | pyruvate kinase, muscle                                                 | 5315  | -1.61415 | 0.04732  | 0.22461 |
| 220094_s_at | CCDC90A  | coiled-coil domain containing 90A                                       | 63933 | -1.33066 | 0.048464 | 0.22461 |
| 202275_at   | G6PD     | glucose-6-phosphate dehydrogenase                                       | 2539  | -1.46785 | 0.04883  | 0.22461 |
| 214146_s_at | PPBP     | pro-platelet basic protein (chemokine (C-X-C motif) ligand 7)           | 5473  | -2.44242 | 0.049566 | 0.22461 |
| 204081_at   | NRGN     | neurogranin (protein kinase C substrate, RC3)                           | 4900  | -2.56374 | 0.049579 | 0.22461 |
| 209868_s_at | RBMS1    | RNA binding motif, single stranded interacting protein 1                | 5937  | 1.165728 | 0.050155 | 0.22461 |
| 211922_s_at | CAT      | catalase                                                                | 847   | 1.232958 | 0.051088 | 0.22461 |
| 222310_at   | SCAF4    | SR-related CTD-associated factor 4                                      | 57466 | 1.077534 | 0.05119  | 0.22461 |
| 200697_at   | HK1      | hexokinase 1                                                            | 3098  | -1.1627  | 0.051949 | 0.22461 |
| 200706_s_at | LITAF    | lipopolysaccharide-induced TNF factor                                   | 9516  | 1.091394 | 0.052104 | 0.22461 |
| 220964_s_at | RAB1B    | RAB1B, member RAS oncogene family                                       | 81876 | -1.24067 | 0.052429 | 0.22461 |
| 210215_at   | TFR2     | transferrin receptor 2                                                  | 7036  | -1.65926 | 0.052589 | 0.22461 |
| 201260_s_at | SYPL1    | synaptophysin-like 1                                                    | 6856  | 1.519931 | 0.052716 | 0.22461 |
| 221771_s_at | MPHOSPH8 | M-phase phosphoprotein 8                                                | 54737 | 1.277564 | 0.053033 | 0.22461 |
| 210986_s_at | TPM1     | tropomyosin 1 (alpha)                                                   | 7168  | -1.54226 | 0.053308 | 0.22461 |
| 203674_at   | HELZ     | helicase with zinc finger                                               | 9931  | 1.115528 | 0.053318 | 0.22461 |
| 207238_s_at | PTPRC    | protein tyrosine phosphatase, receptor type, C                          | 5788  | 1.189131 | 0.053365 | 0.22461 |
| 201864_at   | GDI1     | GDP dissociation inhibitor 1                                            | 2664  | -1.17328 | 0.053513 | 0.22461 |
| 212036_s_at | PNN      | pinin, desmosome associated protein                                     | 5411  | 1.514285 | 0.053837 | 0.22461 |
| 213521_at   | PTPN18   | protein tyrosine phosphatase, non-receptor type 18 (brain-derived)      | 26469 | -1.32436 | 0.05412  | 0.22461 |
| 202644_s_at | TNFAIP3  | tumor necrosis factor, alpha-induced protein 3                          | 7128  | -1.72075 | 0.054213 | 0.22461 |
| 219090_at   | SLC24A3  | solute carrier family 24 (sodium/potassium/calcium exchanger), member 3 | 57419 | -1.33752 | 0.054392 | 0.22461 |
| 209117_at   | WBP2     | WW domain binding protein 2                                             | 23558 | -1.30969 | 0.054585 | 0.22461 |
| 209160_at   | AKR1C3   | aldo-keto reductase family 1, member C3                                 | 8644  | 1.332339 | 0.054731 | 0.22461 |
| 203085_s_at | TGFB1    | transforming growth factor, beta 1                                      | 7040  | -1.75422 | 0.055437 | 0.22461 |

|             |          |                                                                                                             |       |          |          |          |
|-------------|----------|-------------------------------------------------------------------------------------------------------------|-------|----------|----------|----------|
| 200613_at   | AP2M1    | adaptor-related protein complex 2, mu 1 subunit<br>protein-L-isoaspartate (D-aspartate) O-methyltransferase | 1173  | -1.26768 | 0.05634  | 0.22461  |
| 212406_s_at | PCMTD2   | domain containing 2                                                                                         | 55251 | 1.40919  | 0.057779 | 0.22461  |
| 212281_s_at | TMEM97   | transmembrane protein 97                                                                                    | 27346 | -1.25212 | 0.058007 | 0.22461  |
| 222113_s_at | EPS15L1  | epidermal growth factor receptor pathway substrate 15-like 1                                                | 58513 | -1.22321 | 0.058228 | 0.22461  |
| 41047_at    | C9orf16  | chromosome 9 open reading frame 16                                                                          | 79095 | -1.3784  | 0.058369 | 0.22461  |
| 202083_s_at | SEC14L1  | SEC14-like 1 ( <i>S. cerevisiae</i> )                                                                       | 6397  | -1.60251 | 0.058462 | 0.22461  |
| 43544_at    | MED16    | mediator complex subunit 16                                                                                 | 10025 | -1.37264 | 0.059358 | 0.22461  |
| 208398_s_at | TBPL1    | TBP-like 1                                                                                                  | 9519  | -1.09285 | 0.060353 | 0.22461  |
| 200001_at   | CAPNS1   | calpain, small subunit 1                                                                                    | 826   | -1.38469 | 0.060708 | 0.22461  |
| 203321_s_at | ADNP2    | ADNP homeobox 2                                                                                             | 22850 | -1.14224 | 0.060952 | 0.22461  |
| 214752_x_at | FLNA     | filamin A, alpha                                                                                            | 2316  | -1.51816 | 0.061564 | 0.22461  |
| 221539_at   | EIF4EBP1 | eukaryotic translation initiation factor 4E binding protein 1                                               | 1978  | -1.09846 | 0.062496 | 0.22461  |
| 208860_s_at | ATRX     | alpha thalassemia/mental retardation syndrome X-linked                                                      | 546   | 1.305128 | 0.06313  | 0.22461  |
| 215933_s_at | HHEX     | hematopoietically expressed homeobox                                                                        | 3087  | 1.399528 | 0.063251 | 0.22461  |
| 214753_at   | N4BP2L2  | NEDD4 binding protein 2-like 2                                                                              | 10443 | 1.043575 | 0.063268 | 0.22461  |
| 208284_x_at | GGT1     | gamma-glutamyltransferase 1                                                                                 | 2678  | -1.13931 | 0.063281 | 0.22461  |
| 203163_at   | KATNB1   | katanin p80 (WD repeat containing) subunit B 1                                                              | 10300 | -1.04468 | 0.06434  | 0.22461  |
| 209301_at   | CA2      | carbonic anhydrase II                                                                                       | 760   | -1.80993 | 0.064349 | 0.22461  |
| 204480_s_at | C9orf16  | chromosome 9 open reading frame 16                                                                          | 79095 | -1.50337 | 0.064729 | 0.22461  |
| 205668_at   | LY75     | lymphocyte antigen 75                                                                                       | 4065  | 1.143917 | 0.064806 | 0.22461  |
| 211047_x_at | AP2S1    | adaptor-related protein complex 2, sigma 1 subunit                                                          | 1175  | -1.1541  | 0.065359 | 0.22461  |
| 201563_at   | SORD     | sorbitol dehydrogenase                                                                                      | 6652  | -1.02865 | 0.066229 | 0.225836 |
| 214246_x_at | MINK1    | misshapen-like kinase 1                                                                                     | 50488 | -1.37631 | 0.066383 | 0.225836 |
| 212563_at   | BOP1     | block of proliferation 1                                                                                    | 23246 | -1.07647 | 0.067055 | 0.226454 |
| 215706_x_at | ZYX      | zyxin                                                                                                       | 7791  | -1.14429 | 0.067478 | 0.226454 |
| 215116_s_at | DNM1     | dynamamin 1                                                                                                 | 1759  | -1.02496 | 0.067568 | 0.226454 |
| 209044_x_at | SF3B4    | splicing factor 3b, subunit 4, 49kDa                                                                        | 10262 | -1.14403 | 0.069176 | 0.227703 |
| 208977_x_at | TUBB4B   | tubulin, beta 4B class IVb                                                                                  | 10383 | -1.06783 | 0.069385 | 0.227703 |
| 203175_at   | RHOG     | ras homolog family member G                                                                                 | 391   | -1.12466 | 0.07026  | 0.227703 |
| 212739_s_at | NME4     | NME/NM23 nucleoside diphosphate kinase 4                                                                    | 4833  | -1.18    | 0.070482 | 0.227703 |
| 200734_s_at | ARF3     | ADP-ribosylation factor 3                                                                                   | 377   | -1.10487 | 0.070887 | 0.227703 |
| 213036_x_at | ATP2A3   | ATPase, Ca <sup>++</sup> transporting, ubiquitous                                                           | 489   | -1.21253 | 0.07161  | 0.227703 |
| 210428_s_at | HGS      | hepatocyte growth factor-regulated tyrosine kinase substrate                                                | 9146  | -1.08114 | 0.071709 | 0.227703 |

|             |          |                                                                                                   |       |          |          |          |
|-------------|----------|---------------------------------------------------------------------------------------------------|-------|----------|----------|----------|
| 206272_at   | SPHAR    | S-phase response (cyclin related)                                                                 | 10638 | -1.37986 | 0.071711 | 0.227703 |
| 200742_s_at | TPP1     | tripeptidyl peptidase I                                                                           | 1200  | -1.44492 | 0.071977 | 0.227703 |
| 202944_at   | NAGA     | N-acetylgalactosaminidase, alpha-                                                                 | 4668  | -1.0861  | 0.073258 | 0.229457 |
| 216841_s_at | SOD2     | superoxide dismutase 2, mitochondrial                                                             | 6648  | -1.07023 | 0.073344 | 0.229457 |
| 203414_at   | MMD      | monocyte to macrophage differentiation-associated                                                 | 23531 | -1.57415 | 0.073626 | 0.229457 |
| 215438_x_at | GSPT1    | G1 to S phase transition 1                                                                        | 2935  | -1.03476 | 0.074204 | 0.229457 |
| 217918_at   | DYNLRB1  | dynein, light chain, roadblock-type 1                                                             | 83658 | -1.21177 | 0.07474  | 0.229995 |
| 204628_s_at | ITGB3    | integrin, beta 3 (platelet glycoprotein IIIa, antigen CD61)                                       | 3690  | -1.70942 | 0.076434 | 0.233122 |
| 214450_at   | CTSW     | cathepsin W                                                                                       | 1521  | -1.09904 | 0.076703 | 0.233122 |
| 203262_s_at | FAM50A   | family with sequence similarity 50, member A                                                      | 9130  | -1.05318 | 0.077683 | 0.233565 |
| 216956_s_at | ITGA2B   | integrin, alpha 2b (platelet glycoprotein IIb of IIb/IIIa complex, antigen CD41)                  | 3674  | -2.02417 | 0.07797  | 0.233565 |
| 201639_s_at | CPSF1    | cleavage and polyadenylation specific factor 1, 160kDa                                            | 29894 | -1.05345 | 0.079365 | 0.234598 |
| 36711_at    | MAFF     | v-maf musculoaponeurotic fibrosarcoma oncogene homolog F (avian)                                  | 23764 | -2.66779 | 0.079702 | 0.234598 |
| 210910_s_at | POMZP3   | POM121 and ZP3 fusion                                                                             | 22932 | -0.98043 | 0.080921 | 0.234598 |
| 206390_x_at | PF4      | platelet factor 4                                                                                 | 5196  | -2.17632 | 0.081141 | 0.234598 |
| 218443_s_at | DAZAP1   | DAZ associated protein 1                                                                          | 26528 | -0.99013 | 0.081405 | 0.234598 |
| 201052_s_at | PSMF1    | proteasome (prosome, macropain) inhibitor subunit 1 (PI31)                                        | 9491  | -1.17083 | 0.081493 | 0.234598 |
| 211716_x_at | ARHGDI A | Rho GDP dissociation inhibitor (GDI) alpha                                                        | 396   | -1.05994 | 0.081516 | 0.234598 |
| 200839_s_at | CTSB     | cathepsin B                                                                                       | 1508  | -1.23855 | 0.081791 | 0.234598 |
| 203561_at   | FCGR2A   | Fc fragment of IgG, low affinity IIa, receptor (CD32)                                             | 2212  | -1.50392 | 0.082039 | 0.234598 |
| 218611_at   | IER5     | immediate early response 5                                                                        | 51278 | -1.41626 | 0.082127 | 0.234598 |
| 202619_s_at | PLOD2    | procollagen-lysine, 2-oxoglutarate 5-dioxygenase 2                                                | 5352  | -1.06567 | 0.082911 | 0.234625 |
| 204627_s_at | ITGB3    | integrin, beta 3 (platelet glycoprotein IIIa, antigen CD61)                                       | 3690  | -2.11954 | 0.083412 | 0.234625 |
| 201224_s_at | SRRM1    | serine/arginine repetitive matrix 1                                                               | 10250 | -1.23842 | 0.08352  | 0.234625 |
| 217736_s_at | EIF2AK1  | eukaryotic translation initiation factor 2-alpha kinase 1                                         | 27102 | -1.07432 | 0.083557 | 0.234625 |
| 200649_at   | NUCB1    | nucleobindin 1                                                                                    | 4924  | -1.0434  | 0.085339 | 0.23596  |
| 209555_s_at | CD36     | CD36 molecule (thrombospondin receptor)                                                           | 948   | -1.82889 | 0.086873 | 0.23596  |
| 212520_s_at | SMARCA4  | SWI/SNF related, matrix associated, actin dependent regulator of chromatin, subfamily a, member 4 | 6597  | -1.12786 | 0.086976 | 0.23596  |
| 209367_at   | STXBP2   | syntaxin binding protein 2                                                                        | 6813  | -1.12693 | 0.087289 | 0.23596  |
| 53071_s_at  | OGFOD3   | 2-oxoglutarate and iron-dependent oxygenase domain containing 3                                   | 79701 | -1.02384 | 0.087372 | 0.23596  |
| 221953_s_at | MMP24    | matrix metalloproteinase 24 (membrane-inserted)                                                   | 10893 | -1.14292 | 0.087422 | 0.23596  |

|             |          |                                                                                                  |        |          |          |          |
|-------------|----------|--------------------------------------------------------------------------------------------------|--------|----------|----------|----------|
| 212640_at   | PTPLB    | protein tyrosine phosphatase-like (proline instead of catalytic arginine), member b              | 201562 | 1.184144 | 0.087703 | 0.23596  |
| 201797_s_at | VARS     | valyl-tRNA synthetase                                                                            | 7407   | -0.95792 | 0.087831 | 0.23596  |
| 204232_at   | FCER1G   | Fc fragment of IgE, high affinity I, receptor for; gamma polypeptide                             | 2207   | -1.72735 | 0.088324 | 0.236346 |
| 202201_at   | BLVRB    | biliverdin reductase B (flavin reductase (NADPH))                                                | 645    | -1.03625 | 0.088981 | 0.236552 |
| 203192_at   | ABCB6    | ATP-binding cassette, sub-family B (MDR/TAP), member 6                                           | 10058  | -1.03424 | 0.090022 | 0.237141 |
| 221829_s_at | TNPO1    | transportin 1                                                                                    | 3842   | -1.16481 | 0.090459 | 0.237366 |
| 213016_at   | BBX      | bobby sox homolog (Drosophila)                                                                   | 56987  | -1.01796 | 0.091007 | 0.237691 |
| 207574_s_at | GADD45B  | growth arrest and DNA-damage-inducible, beta                                                     | 4616   | -1.53642 | 0.091507 | 0.237691 |
| 207134_x_at | TPSB2    | trypsin beta 2 (gene/pseudogene)                                                                 | 64499  | -1.2023  | 0.092025 | 0.237791 |
| 211962_s_at | ZFP36L1  | ZFP36 ring finger protein-like 1                                                                 | 677    | -1.08806 | 0.094727 | 0.239603 |
| 201412_at   | LRP10    | low density lipoprotein receptor-related protein 10                                              | 26020  | -1.16907 | 0.095687 | 0.239603 |
| 200859_x_at | FLNA     | filamin A, alpha                                                                                 | 2316   | -1.28906 | 0.09598  | 0.239603 |
| 201760_s_at | WSB2     | WD repeat and SOCS box containing 2                                                              | 55884  | -0.9579  | 0.097393 | 0.239603 |
| 212256_at   | GALNT10  | UDP-N-acetyl-alpha-D-galactosamine:polypeptide N-acetylgalactosaminyltransferase 10 (GalNAc-T10) | 55568  | -0.9355  | 0.097486 | 0.239603 |
| 202411_at   | IFI27    | interferon, alpha-inducible protein 27                                                           | 3429   | -1.2038  | 0.097807 | 0.239603 |
| 209190_s_at | DIAPH1   | diaphanous homolog 1 (Drosophila)                                                                | 1729   | -1.03246 | 0.097812 | 0.239603 |
| 212886_at   | CCDC69   | coiled-coil domain containing 69                                                                 | 26112  | -1.0779  | 0.098162 | 0.239603 |
| 215087_at   | C15orf39 | chromosome 15 open reading frame 39                                                              | 56905  | -1.19136 | 0.09937  | 0.239603 |
| 211417_x_at | GGT1     | gamma-glutamyltransferase 1                                                                      | 2678   | -0.97792 | 0.09942  | 0.239603 |
| 218039_at   | NUSAP1   | nucleolar and spindle associated protein 1                                                       | 51203  | -1.16811 | 0.100201 | 0.239603 |
| 215535_s_at | AGPAT1   | 1-acylglycerol-3-phosphate O-acyltransferase 1                                                   | 10554  | -1.14266 | 0.10071  | 0.239603 |
| 219938_s_at | PSTPIP2  | proline-serine-threonine phosphatase interacting protein 2                                       | 9050   | -1.02201 | 0.100884 | 0.239603 |
| 213746_s_at | FLNA     | filamin A, alpha                                                                                 | 2316   | -1.37828 | 0.100915 | 0.239603 |
| 200611_s_at | WDR1     | WD repeat domain 1                                                                               | 9948   | -1.08654 | 0.101143 | 0.239603 |
| 208615_s_at | PTP4A2   | protein tyrosine phosphatase type IVA, member 2                                                  | 8073   | -1.16457 | 0.101287 | 0.239603 |
| 208002_s_at | ACOT7    | acyl-CoA thioesterase 7                                                                          | 11332  | -0.98943 | 0.101855 | 0.239603 |
| 201280_s_at | DAB2     | Dab, mitogen-responsive phosphoprotein, homolog 2 (Drosophila)                                   | 1601   | -1.47352 | 0.10199  | 0.239603 |
| 217529_at   | ORAI2    | ORAI calcium release-activated calcium modulator 2                                               | 80228  | -0.94855 | 0.102013 | 0.239603 |
| 214054_at   | DOK2     | docking protein 2, 56kDa                                                                         | 9046   | -1.44148 | 0.102476 | 0.239603 |
| 222043_at   | CLU      | clusterin                                                                                        | 1191   | -1.34754 | 0.102489 | 0.239603 |
| 201059_at   | CTTN     | cortactin                                                                                        | 2017   | -1.75221 | 0.102546 | 0.239603 |

|             |         |                                                            |        |          |          |          |
|-------------|---------|------------------------------------------------------------|--------|----------|----------|----------|
| 220239_at   | KLHL7   | kelch-like family member 7                                 | 55975  | -1.04556 | 0.102824 | 0.239603 |
| 201950_x_at | CAPZB   | capping protein (actin filament) muscle Z-line, beta       | 832    | -0.9793  | 0.10316  | 0.239603 |
| 207196_s_at | TNIP1   | TNFAIP3 interacting protein 1                              | 10318  | -1.00708 | 0.103374 | 0.239603 |
| 211160_x_at | ACTN1   | actinin, alpha 1                                           | 87     | -1.26927 | 0.103783 | 0.239603 |
| 209350_s_at | GPS2    | G protein pathway suppressor 2                             | 2874   | -1.10209 | 0.103921 | 0.239603 |
| 219667_s_at | BANK1   | B-cell scaffold protein with ankyrin repeats 1             | 55024  | -1.00308 | 0.104821 | 0.239603 |
|             |         | membrane-associated ring finger (C3HC4) 2, E3 ubiquitin    |        |          |          |          |
| 210075_at   | MARCH2  | protein ligase                                             | 51257  | -1.43742 | 0.104896 | 0.239603 |
| 201170_s_at | BHLHE40 | basic helix-loop-helix family, member e40                  | 8553   | -1.52602 | 0.105204 | 0.239603 |
| 204254_s_at | VDR     | vitamin D (1,25- dihydroxyvitamin D3) receptor             | 7421   | -1.04354 | 0.10546  | 0.239603 |
| 210128_s_at | LTB4R   | leukotriene B4 receptor                                    | 1241   | -0.92553 | 0.105789 | 0.239603 |
|             |         | N-acetylneuraminate pyruvate lyase (dihydrodipicolinate    |        |          |          |          |
| 221210_s_at | NPL     | synthase)                                                  | 80896  | -1.20989 | 0.105822 | 0.239603 |
| 210512_s_at | VEGFA   | vascular endothelial growth factor A                       | 7422   | -1.15461 | 0.10674  | 0.240343 |
|             |         | solute carrier family 2 (facilitated glucose transporter), |        |          |          |          |
| 202499_s_at | SLC2A3  | member 3                                                   | 6515   | -1.58321 | 0.106858 | 0.240343 |
| 201125_s_at | ITGB5   | integrin, beta 5                                           | 3693   | -1.33107 | 0.107555 | 0.24035  |
| 206414_s_at | ASAP2   | ArfGAP with SH3 domain, ankyrin repeat and PH domain 2     | 8853   | -1.34473 | 0.107572 | 0.24035  |
| 201360_at   | CST3    | cystatin C                                                 | 1471   | -1.68937 | 0.108964 | 0.242661 |
| 215047_at   | TRIM58  | tripartite motif containing 58                             | 25893  | -0.99092 | 0.11023  | 0.243627 |
| 204493_at   | BID     | BH3 interacting domain death agonist                       | 637    | -0.9825  | 0.110478 | 0.243627 |
| 202728_s_at | LTBP1   | latent transforming growth factor beta binding protein 1   | 4052   | -1.27115 | 0.113678 | 0.246714 |
| 209969_s_at | STAT1   | signal transducer and activator of transcription 1, 91kDa  | 6772   | -1.15673 | 0.113691 | 0.246714 |
| 205241_at   | SCO2    | SCO2 cytochrome c oxidase assembly protein                 | 9997   | -1.4845  | 0.114175 | 0.246714 |
| 203017_s_at | SSX2IP  | synovial sarcoma, X breakpoint 2 interacting protein       | 117178 | -0.94238 | 0.114827 | 0.246714 |
| 203833_s_at | TGOLN2  | trans-golgi network protein 2                              | 10618  | -0.93445 | 0.115059 | 0.246714 |
|             |         | lymphocyte cytosolic protein 2 (SH2 domain containing      |        |          |          |          |
| 205269_at   | LCP2    | leukocyte protein of 76kDa)                                | 3937   | -0.97027 | 0.115226 | 0.246714 |
| 209522_s_at | CRAT    | carnitine O-acetyltransferase                              | 1384   | -1.01234 | 0.116038 | 0.246714 |
| 204629_at   | PARVB   | parvin, beta                                               | 29780  | -1.33625 | 0.116976 | 0.246714 |
| 200609_s_at | WDR1    | WD repeat domain 1                                         | 9948   | -0.99605 | 0.11718  | 0.246714 |
| 203680_at   | PRKAR2B | protein kinase, cAMP-dependent, regulatory, type II, beta  | 5577   | -1.23212 | 0.117344 | 0.246714 |
| 208918_s_at | NADK    | NAD kinase                                                 | 65220  | -1.16887 | 0.119342 | 0.248598 |
| 213716_s_at | SECTM1  | secreted and transmembrane 1                               | 6398   | -1.08088 | 0.119767 | 0.248718 |
| 221269_s_at | SH3BGL3 | SH3 domain binding glutamic acid-rich protein like 3       | 83442  | -1.35229 | 0.120323 | 0.24911  |

|             |          |                                                                                                                  |       |          |          |          |
|-------------|----------|------------------------------------------------------------------------------------------------------------------|-------|----------|----------|----------|
| 212492_s_at | KDM4B    | lysine (K)-specific demethylase 4B                                                                               | 23030 | -0.91067 | 0.121784 | 0.251366 |
| 209729_at   | GAS2L1   | growth arrest-specific 2 like 1<br>solute carrier family 10 (sodium/bile acid cotransporter<br>family), member 3 | 10634 | -1.27348 | 0.12433  | 0.255074 |
| 204928_s_at | SLC10A3  |                                                                                                                  | 8273  | -1.17192 | 0.124419 | 0.255074 |
| 205390_s_at | ANK1     | ankyrin 1, erythrocytic                                                                                          | 286   | -0.88253 | 0.124711 | 0.255074 |
| 211795_s_at | FYB      | FYN binding protein                                                                                              | 2533  | -1.18122 | 0.125242 | 0.255154 |
| 31845_at    | ELF4     | E74-like factor 4 (ets domain transcription factor)                                                              | 2000  | -0.94729 | 0.125919 | 0.255154 |
| 212573_at   | ENDOD1   | endonuclease domain containing 1                                                                                 | 23052 | -1.40577 | 0.126395 | 0.255154 |
| 209560_s_at | DLK1     | delta-like 1 homolog (Drosophila)                                                                                | 8788  | -1.19672 | 0.126533 | 0.255154 |
| 201095_at   | DAP      | death-associated protein                                                                                         | 1611  | -1.11419 | 0.126929 | 0.255154 |
| 212840_at   | UBXN7    | UBX domain protein 7                                                                                             | 26043 | -1.01058 | 0.127011 | 0.255154 |
| 221267_s_at | FAM108A1 | family with sequence similarity 108, member A1                                                                   | 81926 | -1.01634 | 0.128163 | 0.256705 |
| 208074_s_at | AP2S1    | adaptor-related protein complex 2, sigma 1 subunit                                                               | 1175  | -0.99964 | 0.128569 | 0.256758 |
| 200990_at   | TRIM28   | tripartite motif containing 28                                                                                   | 10155 | -1.00558 | 0.129664 | 0.257321 |
| 209839_at   | DNM3     | dynamamin 3                                                                                                      | 26052 | -1.34338 | 0.130264 | 0.257321 |
| 201714_at   | TUBG1    | tubulin, gamma 1                                                                                                 | 7283  | -0.88297 | 0.130361 | 0.257321 |
| 200752_s_at | CAPN1    | calpain 1, (mu/l) large subunit                                                                                  | 823   | -0.92096 | 0.131139 | 0.258085 |
| 220751_s_at | FAXDC2   | fatty acid hydroxylase domain containing 2                                                                       | 10826 | -1.32403 | 0.132172 | 0.258731 |
| 210357_s_at | SMOX     | spermine oxidase                                                                                                 | 54498 | -1.03467 | 0.132612 | 0.258731 |
| 218175_at   | CCDC92   | coiled-coil domain containing 92                                                                                 | 80212 | -1.09884 | 0.132796 | 0.258731 |
| 204000_at   | GNB5     | guanine nucleotide binding protein (G protein), beta 5                                                           | 10681 | -1.19778 | 0.133164 | 0.258731 |
| 217748_at   | ADIPOR1  | adiponectin receptor 1                                                                                           | 51094 | -0.93144 | 0.13362  | 0.258731 |
| 207389_at   | GP1BA    | glycoprotein Ib (platelet), alpha polypeptide                                                                    | 2811  | -1.24025 | 0.134051 | 0.258731 |
| 217992_s_at | EFHD2    | EF-hand domain family, member D2                                                                                 | 79180 | -1.0245  | 0.134143 | 0.258731 |
| 200884_at   | CKB      | creatine kinase, brain                                                                                           | 1152  | -0.88314 | 0.13483  | 0.259317 |
| 206145_at   | RHAG     | Rh-associated glycoprotein                                                                                       | 6005  | -1.17935 | 0.13531  | 0.259504 |
| 220757_s_at | UBXN6    | UBX domain protein 6                                                                                             | 80700 | -0.88851 | 0.136128 | 0.259746 |
| 213274_s_at | CTSB     | cathepsin B                                                                                                      | 1508  | -0.90565 | 0.136204 | 0.259746 |
| 202464_s_at | PFKFB3   | 6-phosphofructo-2-kinase/fructose-2,6-biphosphatase 3                                                            | 5209  | -1.06242 | 0.137167 | 0.26039  |
| 202665_s_at | WIPF1    | WAS/WASL interacting protein family, member 1                                                                    | 7456  | -1.08477 | 0.13731  | 0.26039  |
| 206488_s_at | CD36     | CD36 molecule (thrombospondin receptor)                                                                          | 948   | -1.53958 | 0.138985 | 0.260645 |
| 212089_at   | LMNA     | lamin A/C                                                                                                        | 4000  | -0.92285 | 0.140733 | 0.261597 |
| 205436_s_at | H2AFX    | H2A histone family, member X                                                                                     | 3014  | -1.00358 | 0.140821 | 0.261597 |
| 206834_at   | HBD      | hemoglobin, delta                                                                                                | 3045  | -1.42844 | 0.141235 | 0.261597 |

|             |          |                                                                                                                      |        |          |          |          |
|-------------|----------|----------------------------------------------------------------------------------------------------------------------|--------|----------|----------|----------|
| 209919_x_at | GGT1     | gamma-glutamyltransferase 1                                                                                          | 2678   | -0.89741 | 0.141427 | 0.261597 |
| 207741_x_at | TPSAB1   | tryptase alpha/beta 1                                                                                                | 7177   | -1.06406 | 0.142116 | 0.261597 |
| 31874_at    | GAS2L1   | growth arrest-specific 2 like 1                                                                                      | 10634  | -1.54272 | 0.142456 | 0.261597 |
| 201700_at   | CCND3    | cyclin D3                                                                                                            | 896    | -0.99741 | 0.142709 | 0.261597 |
| 205683_x_at | TPSAB1   | tryptase alpha/beta 1                                                                                                | 7177   | -1.01525 | 0.142713 | 0.261597 |
| 201061_s_at | STOM     | stomatin                                                                                                             | 2040   | -1.01078 | 0.14297  | 0.261597 |
| 203016_s_at | SSX2IP   | synovial sarcoma, X breakpoint 2 interacting protein                                                                 | 117178 | -0.95396 | 0.143425 | 0.261722 |
| 220496_at   | CLEC1B   | C-type lectin domain family 1, member B<br>inhibitor of kappa light polypeptide gene enhancer in B-cells,            | 51266  | -1.54811 | 0.14406  | 0.262175 |
| 209929_s_at | IKBKG    | kinase gamma                                                                                                         | 8517   | -0.89402 | 0.145589 | 0.262942 |
| 37028_at    | PPP1R15A | protein phosphatase 1, regulatory subunit 15A<br>transducin-like enhancer of split 3 (E(sp1) homolog,<br>Drosophila) | 23645  | -1.05228 | 0.14582  | 0.262942 |
| 212769_at   | TLE3     |                                                                                                                      | 7090   | -0.90676 | 0.14604  | 0.262942 |
| 203581_at   | RAB4A    | RAB4A, member RAS oncogene family                                                                                    | 5867   | -1.01651 | 0.146743 | 0.262942 |
| 213956_at   | CEP350   | centrosomal protein 350kDa                                                                                           | 9857   | -0.85883 | 0.146813 | 0.262942 |
| 215382_x_at | TPSB2    | tryptase beta 2 (gene/pseudogene)                                                                                    | 64499  | -0.977   | 0.148064 | 0.263547 |
| 201830_s_at | NET1     | neuroepithelial cell transforming 1                                                                                  | 10276  | -0.9677  | 0.148301 | 0.263547 |
| 201693_s_at | EGR1     | early growth response 1                                                                                              | 1958   | -1.15545 | 0.148318 | 0.263547 |
| 215498_s_at | MAP2K3   | mitogen-activated protein kinase kinase 3                                                                            | 5606   | -1.08177 | 0.149281 | 0.264012 |
| 204026_s_at | ZWINT    | ZW10 interactor, kinetochore protein                                                                                 | 11130  | -1.12549 | 0.149413 | 0.264012 |
| 209170_s_at | GPM6B    | glycoprotein M6B                                                                                                     | 2824   | 0.976338 | 0.14975  | 0.264012 |
| 221211_s_at | MAP3K7CL | MAP3K7 C-terminal like                                                                                               | 56911  | -1.30326 | 0.150281 | 0.264261 |
| 203045_at   | NINJ1    | ninjurin 1                                                                                                           | 4814   | -1.13628 | 0.15069  | 0.264293 |
| 210084_x_at | TPSAB1   | tryptase alpha/beta 1                                                                                                | 7177   | -0.99706 | 0.151879 | 0.264649 |
| 207945_s_at | CSNK1D   | casein kinase 1, delta<br>T-cell, immune regulator 1, ATPase, H+ transporting,                                       | 1453   | -0.90784 | 0.152234 | 0.264649 |
| 204158_s_at | TCIRG1   | lysosomal V0 subunit A3                                                                                              | 10312  | -1.17593 | 0.152276 | 0.264649 |
| 200766_at   | CTSD     | cathepsin D                                                                                                          | 1509   | -0.93104 | 0.153066 | 0.265027 |
| 215819_s_at | RHCE     | Rh blood group, CcEe antigens                                                                                        | 6006   | -0.9917  | 0.154157 | 0.266177 |
| 203485_at   | RTN1     | reticulon 1                                                                                                          | 6252   | -1.21235 | 0.154517 | 0.266177 |
| 215240_at   | ITGB3    | integrin, beta 3 (platelet glycoprotein IIIa, antigen CD61)                                                          | 3690   | -1.44118 | 0.156    | 0.267603 |
| 201761_at   | MTHFD2   | methylenetetrahydrofolate dehydrogenase (NADP+<br>dependent) 2, methenyltetrahydrofolate cyclohydrolase              | 10797  | -0.98494 | 0.156692 | 0.267603 |
| 201904_s_at | CTDSPL   | CTD (carboxy-terminal domain, RNA polymerase II,<br>polypeptide A) small phosphatase-like                            | 10217  | -0.91323 | 0.156796 | 0.267603 |

|             |          |                                                                                        |        |          |          |          |
|-------------|----------|----------------------------------------------------------------------------------------|--------|----------|----------|----------|
| 201906_s_at | CTDSPL   | CTD (carboxy-terminal domain, RNA polymerase II, polypeptide A) small phosphatase-like | 10217  | -0.94383 | 0.156925 | 0.267603 |
| 203854_at   | CFI      | complement factor I                                                                    | 3426   | 0.869863 | 0.158526 | 0.268092 |
| 204925_at   | CTNS     | cystinosis, lysosomal cystine transporter                                              | 1497   | -0.97532 | 0.158632 | 0.268092 |
| 204306_s_at | CD151    | CD151 molecule (Raph blood group)                                                      | 977    | -0.94181 | 0.158669 | 0.268092 |
| 206380_s_at | CFP      | complement factor properdin                                                            | 5199   | -1.1026  | 0.158939 | 0.268092 |
| 204961_s_at | NCF1     | neutrophil cytosolic factor 1                                                          | 653361 | -1.43048 | 0.159385 | 0.268092 |
| 201810_s_at | SH3BP5   | SH3-domain binding protein 5 (BTK-associated)                                          | 9467   | -1.02141 | 0.159588 | 0.268092 |
| 204192_at   | CD37     | CD37 molecule                                                                          | 951    | -1.01901 | 0.162409 | 0.270814 |
| 202082_s_at | SEC14L1  | SEC14-like 1 ( <i>S. cerevisiae</i> )                                                  | 6397   | -0.89139 | 0.163106 | 0.271309 |
| 218009_s_at | PRC1     | protein regulator of cytokinesis 1                                                     | 9055   | -1.11022 | 0.16572  | 0.274981 |
| 218522_s_at | MAP1S    | microtubule-associated protein 1S                                                      | 55201  | -0.95913 | 0.166988 | 0.275781 |
| 214369_s_at | RASGRP2  | RAS guanyl releasing protein 2 (calcium and DAG-regulated)                             | 10235  | -0.91512 | 0.167017 | 0.275781 |
| 218243_at   | RUFY1    | RUN and FYVE domain containing 1                                                       | 80230  | -1.00705 | 0.168966 | 0.278235 |
| 214965_at   | SPATA2L  | spermatogenesis associated 2-like                                                      | 124044 | -0.97367 | 0.169324 | 0.278235 |
| 212027_at   | RBM25    | RNA binding motif protein 25                                                           | 58517  | -1.0829  | 0.17147  | 0.279943 |
| 218148_at   | CENPT    | centromere protein T                                                                   | 80152  | -0.88627 | 0.171898 | 0.279943 |
| 203234_at   | UPP1     | uridine phosphorylase 1                                                                | 7378   | -1.02931 | 0.172377 | 0.279943 |
| 200661_at   | CTSA     | cathepsin A                                                                            | 5476   | -1.40173 | 0.172629 | 0.279943 |
| 210793_s_at | NUP98    | nucleoporin 98kDa                                                                      | 4928   | -1.01125 | 0.173817 | 0.279943 |
| 215464_s_at | TAX1BP3  | Tax1 (human T-cell leukemia virus type I) binding protein 3                            | 30851  | -1.07322 | 0.174266 | 0.279943 |
| 204482_at   | CLDN5    | claudin 5                                                                              | 7122   | -1.19654 | 0.174447 | 0.279943 |
| 204198_s_at | RUNX3    | runt-related transcription factor 3                                                    | 864    | -0.98615 | 0.174457 | 0.279943 |
| 212195_at   | IL6ST    | interleukin 6 signal transducer (gp130, oncostatin M receptor)                         | 3572   | -0.93935 | 0.174626 | 0.279943 |
| 209304_x_at | GADD45B  | growth arrest and DNA-damage-inducible, beta                                           | 4616   | -0.99482 | 0.174913 | 0.279943 |
| 204079_at   | TPST2    | tyrosylprotein sulfotransferase 2                                                      | 8459   | -1.11621 | 0.177613 | 0.283594 |
| 206167_s_at | ARHGAP6  | Rho GTPase activating protein 6                                                        | 395    | -1.27531 | 0.178208 | 0.283875 |
| 220336_s_at | GP6      | glycoprotein VI (platelet)                                                             | 51206  | -1.06098 | 0.183391 | 0.290763 |
| 214464_at   | CDC42BPA | CDC42 binding protein kinase alpha (DMPK-like)                                         | 8476   | -0.96701 | 0.186028 | 0.292695 |
| 213887_s_at | POLR2E   | polymerase (RNA) II (DNA directed) polypeptide E, 25kDa                                | 5434   | -0.91232 | 0.186513 | 0.292695 |
| 216261_at   | ITGB3    | integrin, beta 3 (platelet glycoprotein IIIa, antigen CD61)                            | 3690   | -1.19784 | 0.187072 | 0.292695 |
| 213836_s_at | WIPI1    | WD repeat domain, phosphoinositide interacting 1                                       | 55062  | -1.00273 | 0.187347 | 0.292695 |
| 218032_at   | SNN      | stannin                                                                                | 8303   | -1.21538 | 0.189158 | 0.293378 |
| 200931_s_at | VCL      | vinculin                                                                               | 7414   | -0.92232 | 0.190234 | 0.294037 |



|             |          |                                                                         |        |          |          |          |
|-------------|----------|-------------------------------------------------------------------------|--------|----------|----------|----------|
| 220110_s_at | NXF3     | nuclear RNA export factor 3                                             | 56000  | -0.84883 | 0.194112 | 0.298064 |
| 219998_at   | LGALS1   | lectin, galactoside-binding-like                                        | 29094  | -0.88669 | 0.19416  | 0.298064 |
| 200648_s_at | GLUL     | glutamate-ammonia ligase                                                | 2752   | -0.885   | 0.196266 | 0.300615 |
| 207075_at   | NLRP3    | NLR family, pyrin domain containing 3                                   | 114548 | -1.04141 | 0.196978 | 0.300727 |
| 202814_s_at | HEXIM1   | hexamethylene bis-acetamide inducible 1                                 | 10614  | -0.86963 | 0.197227 | 0.300727 |
| 211582_x_at | LST1     | leukocyte specific transcript 1                                         | 7940   | -0.89977 | 0.198407 | 0.301846 |
| 57588_at    | SLC24A3  | solute carrier family 24 (sodium/potassium/calcium exchanger), member 3 | 57419  | -0.8268  | 0.199252 | 0.301985 |
| 209881_s_at | LAT      | linker for activation of T cells                                        | 27040  | -0.84958 | 0.199391 | 0.301985 |
| 213537_at   | HLA-DPA1 | major histocompatibility complex, class II, DP alpha 1                  | 3113   | -1.00128 | 0.200355 | 0.302768 |
| 214084_x_at | NCF1C    | neutrophil cytosolic factor 1C pseudogene                               | 654817 | -1.32671 | 0.201691 | 0.303721 |
| 202555_s_at | MYLK     | myosin light chain kinase                                               | 4638   | -1.35821 | 0.201883 | 0.303721 |
| 222024_s_at | AKAP13   | A kinase (PRKA) anchor protein 13                                       | 11214  | -0.9453  | 0.20348  | 0.305445 |
| 207522_s_at | ATP2A3   | ATPase, Ca <sup>++</sup> transporting, ubiquitous                       | 489    | -0.86192 | 0.204597 | 0.305832 |
| 202228_s_at | NPTN     | neuroplastin                                                            | 27020  | -0.94477 | 0.204641 | 0.305832 |
| 204396_s_at | GRK5     | G protein-coupled receptor kinase 5                                     | 2869   | -1.18973 | 0.205515 | 0.306089 |
| 214073_at   | CTTN     | cortactin                                                               | 2017   | -1.42385 | 0.205717 | 0.306089 |
| 217764_s_at | RAB31    | RAB31, member RAS oncogene family                                       | 11031  | -1.28868 | 0.206889 | 0.306253 |
| 208792_s_at | CLU      | clusterin                                                               | 1191   | -1.32868 | 0.207424 | 0.306253 |
| 218945_at   | METTL22  | methyltransferase like 22                                               | 79091  | -0.81822 | 0.207478 | 0.306253 |
| 209166_s_at | MAN2B1   | mannosidase, alpha, class 2B, member 1                                  | 4125   | -0.87235 | 0.207908 | 0.306253 |
| 221856_s_at | FAM63A   | family with sequence similarity 63, member A                            | 55793  | -0.90737 | 0.208242 | 0.306253 |
| 200622_x_at | CALM3    | calmodulin 3 (phosphorylase kinase, delta)                              | 808    | -1.05371 | 0.208541 | 0.306253 |
| 216834_at   | RGS1     | regulator of G-protein signaling 1                                      | 5996   | -1.58039 | 0.209603 | 0.307146 |
| 201234_at   | ILK      | integrin-linked kinase                                                  | 3611   | -0.893   | 0.210231 | 0.307401 |
| 212016_s_at | PTBP1    | polypyrimidine tract binding protein 1                                  | 5725   | -0.82271 | 0.214043 | 0.311628 |
| 203196_at   | ABCC4    | ATP-binding cassette, sub-family C (CFTR/MRP), member 4                 | 10257  | -0.94809 | 0.215339 | 0.312842 |
| 204838_s_at | MLH3     | mutL homolog 3 (E. coli)                                                | 27030  | -1.17819 | 0.217494 | 0.314178 |
| 210314_x_at | TNFSF13  | tumor necrosis factor (ligand) superfamily, member 13                   | 8741   | -0.85424 | 0.217651 | 0.314178 |
| 221027_s_at | PLA2G12A | phospholipase A2, group XIIA                                            | 81579  | -1.0047  | 0.219833 | 0.31622  |
| 207206_s_at | ALOX12   | arachidonate 12-lipoxygenase                                            | 239    | -1.20411 | 0.221481 | 0.316376 |
| 336_at      | TBXA2R   | thromboxane A2 receptor                                                 | 6915   | -0.9854  | 0.221852 | 0.316376 |
| 208924_at   | RNF11    | ring finger protein 11                                                  | 26994  | -0.85227 | 0.222362 | 0.316376 |
| 204440_at   | CD83     | CD83 molecule                                                           | 9308   | -0.86406 | 0.222738 | 0.316376 |

|             |           |                                                                                                                            |        |          |          |          |
|-------------|-----------|----------------------------------------------------------------------------------------------------------------------------|--------|----------|----------|----------|
| 216033_s_at | FYN       | FYN oncogene related to SRC, FGR, YES                                                                                      | 2534   | -0.86181 | 0.222912 | 0.316376 |
| 207414_s_at | PCSK6     | proprotein convertase subtilisin/kexin type 6                                                                              | 5046   | -1.24651 | 0.224243 | 0.317072 |
| 202014_at   | PPP1R15A  | protein phosphatase 1, regulatory subunit 15A                                                                              | 23645  | -0.9299  | 0.224339 | 0.317072 |
| 204256_at   | ELOVL6    | ELOVL fatty acid elongase 6                                                                                                | 79071  | -0.916   | 0.225463 | 0.317997 |
| 216474_x_at | TPSB2     | tryptase beta 2 (gene/pseudogene)                                                                                          | 64499  | -0.84525 | 0.227141 | 0.319076 |
| 200696_s_at | GSN       | gelsolin                                                                                                                   | 2934   | -0.94992 | 0.227466 | 0.319076 |
| 206632_s_at | APOBEC3B  | apolipoprotein B mRNA editing enzyme, catalytic polypeptide-like 3B                                                        | 9582   | -1.04605 | 0.228843 | 0.320097 |
| 221496_s_at | TOB2      | transducer of ERBB2, 2                                                                                                     | 10766  | -0.78204 | 0.231572 | 0.323245 |
| 219630_at   | PDZK1IP1  | PDZK1 interacting protein 1                                                                                                | 10158  | -1.15529 | 0.234788 | 0.326336 |
| 214696_at   | MIR22HG   | MIR22 host gene (non-protein coding)                                                                                       | 84981  | -0.82752 | 0.235232 | 0.326336 |
| 213275_x_at | CTSB      | cathepsin B                                                                                                                | 1508   | -0.98223 | 0.235914 | 0.326614 |
| 215343_at   | CCDC88C   | coiled-coil domain containing 88C                                                                                          | 440193 | -0.83997 | 0.23881  | 0.328606 |
| 205347_s_at | TMSB15A   | thymosin beta 15a                                                                                                          | 11013  | -0.82645 | 0.241173 | 0.329982 |
| 213093_at   | PRKCA     | protein kinase C, alpha                                                                                                    | 5578   | -0.92248 | 0.241407 | 0.329982 |
| 218217_at   | SCPEP1    | serine carboxypeptidase 1                                                                                                  | 59342  | -0.82069 | 0.2415   | 0.329982 |
| 201490_s_at | PPIF      | peptidylprolyl isomerase F                                                                                                 | 10105  | -0.81917 | 0.242498 | 0.329982 |
| 204187_at   | GMPR      | guanosine monophosphate reductase                                                                                          | 2766   | -0.83239 | 0.248436 | 0.336382 |
| 217762_s_at | RAB31     | RAB31, member RAS oncogene family                                                                                          | 11031  | -1.02517 | 0.252078 | 0.339954 |
| 204790_at   | SMAD7     | SMAD family member 7                                                                                                       | 4092   | -0.76543 | 0.253693 | 0.341452 |
| 209813_x_at | TARP      | TCR gamma alternate reading frame protein                                                                                  | 445347 | -0.85554 | 0.256336 | 0.344324 |
| 212636_at   | QKI       | QKI, KH domain containing, RNA binding serpin peptidase inhibitor, clade A (alpha-1 antiproteinase, antitrypsin), member 1 | 9444   | -0.79642 | 0.257784 | 0.344583 |
| 211429_s_at | SERPINA1  | antitrypsin, member 1                                                                                                      | 5265   | -1.37823 | 0.258343 | 0.344583 |
| 205253_at   | PBX1      | pre-B-cell leukemia homeobox 1                                                                                             | 5087   | -0.76555 | 0.258565 | 0.344583 |
| 201735_s_at | CLCN3     | chloride channel, voltage-sensitive 3                                                                                      | 1182   | -0.94043 | 0.260503 | 0.346484 |
| 205950_s_at | CA1       | carbonic anhydrase I                                                                                                       | 759    | -0.96583 | 0.262137 | 0.347974 |
| 201334_s_at | ARHGEF12  | Rho guanine nucleotide exchange factor (GEF) 12                                                                            | 23365  | -0.77329 | 0.264462 | 0.350312 |
| 210987_x_at | TPM1      | tropomyosin 1 (alpha)                                                                                                      | 7168   | -0.82871 | 0.265224 | 0.350312 |
| 209806_at   | HIST1H2BK | histone cluster 1, H2bk                                                                                                    | 85236  | -0.86055 | 0.266486 | 0.350312 |
| 215492_x_at | PTCRA     | pre T-cell antigen receptor alpha                                                                                          | 171558 | -0.904   | 0.271153 | 0.355069 |
| 205099_s_at | CCR1      | chemokine (C-C motif) receptor 1                                                                                           | 1230   | -0.80241 | 0.275833 | 0.359113 |
| 202007_at   | NID1      | nidogen 1                                                                                                                  | 4811   | -0.78832 | 0.278249 | 0.361563 |
| 210845_s_at | PLAUR     | plasminogen activator, urokinase receptor                                                                                  | 5329   | -0.82653 | 0.280926 | 0.364343 |

|             |         |                                                                                                                                       |        |          |          |          |
|-------------|---------|---------------------------------------------------------------------------------------------------------------------------------------|--------|----------|----------|----------|
| 218662_s_at | NCAPG   | non-SMC condensin I complex, subunit G                                                                                                | 64151  | -0.73805 | 0.281927 | 0.364942 |
| 209459_s_at | ABAT    | 4-aminobutyrate aminotransferase                                                                                                      | 18     | -0.83695 | 0.28286  | 0.365451 |
| 208161_s_at | ABCC3   | ATP-binding cassette, sub-family C (CFTR/MRP), member 3                                                                               | 8714   | -0.87352 | 0.283451 | 0.365517 |
| 210429_at   | RHD     | Rh blood group, D antigen                                                                                                             | 6007   | -1.02292 | 0.285289 | 0.365856 |
| 208791_at   | CLU     | clusterin                                                                                                                             | 1191   | -1.10749 | 0.285331 | 0.365856 |
| 36566_at    | CTNS    | cystinosis, lysosomal cystine transporter                                                                                             | 1497   | -0.72179 | 0.285335 | 0.365856 |
| 218711_s_at | SDPR    | serum deprivation response                                                                                                            | 8436   | -0.86687 | 0.285908 | 0.365897 |
| 201732_s_at | CLCN3   | chloride channel, voltage-sensitive 3                                                                                                 | 1182   | -0.82971 | 0.287865 | 0.367365 |
| 212570_at   | ENDOD1  | endonuclease domain containing 1                                                                                                      | 23052  | -0.73257 | 0.289756 | 0.368708 |
| 203411_s_at | LMNA    | lamin A/C                                                                                                                             | 4000   | -0.7781  | 0.290282 | 0.368708 |
| 211252_x_at | PTCRA   | pre T-cell antigen receptor alpha                                                                                                     | 171558 | -0.8545  | 0.291611 | 0.369032 |
| 204908_s_at | BCL3    | B-cell CLL/lymphoma 3                                                                                                                 | 602    | -0.87358 | 0.292902 | 0.369953 |
| 218935_at   | EHD3    | EH-domain containing 3                                                                                                                | 30845  | -0.93363 | 0.293563 | 0.370097 |
| 219983_at   | HRASLS  | HRAS-like suppressor<br>solute carrier family 2 (facilitated glucose transporter),<br>member 6                                        | 57110  | -0.72599 | 0.298402 | 0.374935 |
| 220091_at   | SLC2A6  |                                                                                                                                       | 11182  | -0.7439  | 0.298508 | 0.374935 |
| 212657_s_at | IL1RN   | interleukin 1 receptor antagonist                                                                                                     | 3557   | -0.78633 | 0.300604 | 0.376172 |
| 210240_s_at | CDKN2D  | cyclin-dependent kinase inhibitor 2D (p19, inhibits CDK4)                                                                             | 1032   | -0.7304  | 0.304949 | 0.380904 |
| 213338_at   | TMEM158 | transmembrane protein 158 (gene/pseudogene)<br>v-maf musculoaponeurotic fibrosarcoma oncogene homolog<br>B (avian)                    | 25907  | -0.83724 | 0.308131 | 0.382561 |
| 218559_s_at | MAFB    |                                                                                                                                       | 9935   | -1.05359 | 0.308532 | 0.382561 |
| 221050_s_at | GTPBP2  | GTP binding protein 2                                                                                                                 | 54676  | -0.69663 | 0.308832 | 0.382561 |
| 201131_s_at | CDH1    | cadherin 1, type 1, E-cadherin (epithelial)                                                                                           | 999    | -0.70327 | 0.3091   | 0.382561 |
| 216253_s_at | PARVB   | parvin, beta                                                                                                                          | 29780  | -0.85494 | 0.309748 | 0.382663 |
| 202988_s_at | RGS1    | regulator of G-protein signaling 1                                                                                                    | 5996   | -1.01339 | 0.312601 | 0.385484 |
| 205786_s_at | ITGAM   | integrin, alpha M (complement component 3 receptor 3<br>subunit)<br>Dab, mitogen-responsive phosphoprotein, homolog 2<br>(Drosophila) | 3684   | -0.83414 | 0.314385 | 0.386979 |
| 210757_x_at | DAB2    |                                                                                                                                       | 1601   | -0.74514 | 0.315103 | 0.387159 |
| 212723_at   | JMJD6   | jumonji domain containing 6<br>proteoglycan 2, bone marrow (natural killer cell activator,                                            | 23210  | -0.75129 | 0.319118 | 0.391333 |
| 211743_s_at | PRG2    | eosinophil granule major basic protein)                                                                                               | 5553   | -0.78462 | 0.319656 | 0.391333 |
| 222108_at   | AMIGO2  | adhesion molecule with Ig-like domain 2                                                                                               | 347902 | -0.67947 | 0.320818 | 0.392046 |
| 204240_s_at | SMC2    | structural maintenance of chromosomes 2                                                                                               | 10592  | -0.70057 | 0.322141 | 0.392954 |
| 217763_s_at | RAB31   | RAB31, member RAS oncogene family                                                                                                     | 11031  | -0.86003 | 0.327317 | 0.397715 |

|             |          |                                                                                                   |       |          |          |          |
|-------------|----------|---------------------------------------------------------------------------------------------------|-------|----------|----------|----------|
| 204467_s_at | SNCA     | synuclein, alpha (non A4 component of amyloid precursor)                                          | 6622  | -0.70464 | 0.327807 | 0.397715 |
| 216063_at   | HBBP1    | hemoglobin, beta pseudogene 1                                                                     | 3044  | -0.94717 | 0.329519 | 0.399078 |
| 202581_at   | HSPA1A   | heat shock 70kDa protein 1A                                                                       | 3303  | -0.98594 | 0.331291 | 0.40042  |
| 210169_at   | SEC14L5  | SEC14-like 5 ( <i>S. cerevisiae</i> )                                                             | 9717  | -0.74193 | 0.33181  | 0.40042  |
| 57082_at    | LDLRAP1  | low density lipoprotein receptor adaptor protein 1                                                | 26119 | -0.8255  | 0.333963 | 0.402301 |
| 217022_s_at | IGH      | immunoglobulin heavy locus                                                                        | 3492  | -0.84526 | 0.336016 | 0.404055 |
| 210734_x_at | MAX      | MYC associated factor X                                                                           | 4149  | -0.69037 | 0.337578 | 0.405064 |
| 204099_at   | SMARCD3  | SWI/SNF related, matrix associated, actin dependent regulator of chromatin, subfamily d, member 3 | 6604  | -0.66865 | 0.338052 | 0.405064 |
| 218585_s_at | DTL      | denticleless E3 ubiquitin protein ligase homolog ( <i>Drosophila</i> )                            | 51514 | -0.76574 | 0.338678 | 0.405098 |
| 220968_s_at | TSPAN9   | tetraspanin 9                                                                                     | 10867 | -0.64905 | 0.342149 | 0.408528 |
| 204993_at   | GNAZ     | guanine nucleotide binding protein (G protein), alpha z polypeptide                               | 2781  | -0.77214 | 0.343386 | 0.409282 |
| 210992_x_at | FCGR2C   | Fc fragment of IgG, low affinity IIc, receptor for (CD32) (gene/pseudogene)                       | 9103  | -0.70674 | 0.344048 | 0.409351 |
| 219412_at   | RAB38    | RAB38, member RAS oncogene family                                                                 | 23682 | -0.70456 | 0.345526 | 0.410051 |
| 219892_at   | TM6SF1   | transmembrane 6 superfamily member 1                                                              | 53346 | -0.67737 | 0.345848 | 0.410051 |
| 205098_at   | CCR1     | chemokine (C-C motif) receptor 1                                                                  | 1230  | -0.67251 | 0.348407 | 0.411654 |
| 206883_x_at | GP9      | glycoprotein IX (platelet)                                                                        | 2815  | -0.93388 | 0.348416 | 0.411654 |
| 204546_at   | KIAA0513 | KIAA0513                                                                                          | 9764  | -0.6776  | 0.354075 | 0.416884 |
| 211984_at   | CALM1    | calmodulin 1 (phosphorylase kinase, delta)                                                        | 801   | -0.67903 | 0.356016 | 0.418443 |
| 212681_at   | EPB41L3  | erythrocyte membrane protein band 4.1-like 3                                                      | 23136 | -0.74882 | 0.363256 | 0.426212 |
| 209586_s_at | PRUNE    | prune homolog ( <i>Drosophila</i> )                                                               | 58497 | -0.71365 | 0.365133 | 0.427673 |
| 204122_at   | TYROBP   | TYRO protein tyrosine kinase binding protein                                                      | 7305  | -0.98164 | 0.368409 | 0.429921 |
| 221698_s_at | CLEC7A   | C-type lectin domain family 7, member A                                                           | 64581 | -0.72388 | 0.368957 | 0.429921 |
| 202269_x_at | GBP1     | guanylate binding protein 1, interferon-inducible                                                 | 2633  | -0.72489 | 0.374443 | 0.434817 |
| 37965_at    | PARVB    | parvin, beta                                                                                      | 29780 | -0.73203 | 0.378544 | 0.438076 |
| 206937_at   | SPTA1    | spectrin, alpha, erythrocytic 1 (elliptocytosis 2)                                                | 6708  | -0.63911 | 0.379343 | 0.438252 |
| 205863_at   | S100A12  | S100 calcium binding protein A12                                                                  | 6283  | -0.76877 | 0.385662 | 0.443766 |
| 206465_at   | ACSBG1   | acyl-CoA synthetase bubblegum family member 1                                                     | 23205 | -0.69391 | 0.386083 | 0.443766 |
| 208601_s_at | TUBB1    | tubulin, beta 1 class VI                                                                          | 81027 | -0.7751  | 0.38836  | 0.445627 |
| 208501_at   | GFI1B    | growth factor independent 1B transcription repressor                                              | 8328  | -0.69445 | 0.391518 | 0.44802  |
| 204319_s_at | RGS10    | regulator of G-protein signaling 10                                                               | 6001  | -0.66481 | 0.391769 | 0.44802  |
| 204115_at   | GNG11    | guanine nucleotide binding protein (G protein), gamma 11                                          | 2791  | -0.85973 | 0.396611 | 0.450473 |

|             |           |                                                                                       |       |          |          |          |
|-------------|-----------|---------------------------------------------------------------------------------------|-------|----------|----------|----------|
| 222204_s_at | RRN3      | RRN3 RNA polymerase I transcription factor homolog (S. cerevisiae)                    | 54700 | -0.6018  | 0.396615 | 0.450473 |
| 204446_s_at | ALOX5     | arachidonate 5-lipoxygenase                                                           | 240   | -0.88998 | 0.397241 | 0.450473 |
| 203508_at   | TNFRSF1B  | tumor necrosis factor receptor superfamily, member 1B                                 | 7133  | -0.6867  | 0.398463 | 0.451103 |
| 203305_at   | F13A1     | coagulation factor XIII, A1 polypeptide                                               | 2162  | -0.84164 | 0.401077 | 0.453304 |
| 208438_s_at | FGR       | Gardner-Rasheed feline sarcoma viral (v-fgr) oncogene homolog                         | 2268  | -0.62594 | 0.406618 | 0.458801 |
| 205463_s_at | PDGFA     | platelet-derived growth factor alpha polypeptide                                      | 5154  | -0.67628 | 0.408281 | 0.459911 |
| 202917_s_at | S100A8    | S100 calcium binding protein A8                                                       | 6279  | -1.20152 | 0.411847 | 0.463156 |
| 207156_at   | HIST1H2AG | histone cluster 1, H2ag                                                               | 8969  | -0.70408 | 0.413233 | 0.463944 |
| 202833_s_at | SERPINA1  | serpin peptidase inhibitor, clade A (alpha-1 antiproteinase, antitrypsin), member 1   | 5265  | -0.91706 | 0.413994 | 0.46403  |
| 207315_at   | CD226     | CD226 molecule                                                                        | 10666 | -0.62666 | 0.418074 | 0.466595 |
| 204971_at   | CSTA      | cystatin A (stefin A)                                                                 | 1475  | -0.89766 | 0.418207 | 0.466595 |
| 201954_at   | ARPC1B    | actin related protein 2/3 complex, subunit 1B, 41kDa                                  | 10095 | -0.64277 | 0.41835  | 0.466595 |
| 206254_at   | EGF       | epidermal growth factor                                                               | 1950  | -0.61118 | 0.425271 | 0.472756 |
| 204475_at   | MMP1      | matrix metalloproteinase 1 (interstitial collagenase)                                 | 4312  | -0.79765 | 0.427481 | 0.474434 |
| 205229_s_at | COCH      | coagulation factor C homolog, cochlin (Limulus polyphemus)                            | 1690  | -0.53396 | 0.432368 | 0.479072 |
| 205127_at   | PTGS1     | prostaglandin-endoperoxide synthase 1 (prostaglandin G/H synthase and cyclooxygenase) | 5742  | -0.54531 | 0.44234  | 0.488522 |
| 203087_s_at | KIF2A     | kinesin heavy chain member 2A                                                         | 3796  | -0.59853 | 0.443634 | 0.488965 |
| 202953_at   | C1QB      | complement component 1, q subcomponent, B chain                                       | 713   | -0.82302 | 0.444186 | 0.488965 |
| 218656_s_at | LHFP      | lipoma HMGIC fusion partner                                                           | 10186 | -0.56539 | 0.445989 | 0.489822 |
| 214511_x_at | FCGR1B    | Fc fragment of IgG, high affinity Ib, receptor (CD64)                                 | 2210  | -0.69072 | 0.446411 | 0.489822 |
| 208406_s_at | GRAP2     | GRB2-related adaptor protein 2                                                        | 9402  | -0.68765 | 0.451229 | 0.492736 |
| 56256_at    | SIDT2     | SID1 transmembrane family, member 2                                                   | 51092 | -0.74229 | 0.451977 | 0.492736 |
| 209204_at   | LMO4      | LIM domain only 4                                                                     | 8543  | -0.52105 | 0.454155 | 0.494314 |
| 205612_at   | MMRN1     | multimerin 1                                                                          | 22915 | -0.58072 | 0.457551 | 0.496919 |
| 206116_s_at | TPM1      | tropomyosin 1 (alpha)                                                                 | 7168  | -0.61863 | 0.458017 | 0.496919 |
| 204858_s_at | TYMP      | thymidine phosphorylase                                                               | 1890  | -0.62323 | 0.459985 | 0.497869 |
| 204308_s_at | TECPR2    | tectonin beta-propeller repeat containing 2                                           | 9895  | -0.56607 | 0.460363 | 0.497869 |
| 204466_s_at | SNCA      | synuclein, alpha (non A4 component of amyloid precursor)                              | 6622  | -0.60596 | 0.461512 | 0.498316 |
| 202270_at   | GBP1      | guanylate binding protein 1, interferon-inducible                                     | 2633  | -0.55471 | 0.469505 | 0.505333 |
| 218223_s_at | PLEKHO1   | pleckstrin homology domain containing, family O member 1                              | 51177 | -0.63829 | 0.474253 | 0.509634 |
| 206881_s_at | LILRA3    | leukocyte immunoglobulin-like receptor, subfamily A (without                          | 11026 | -0.61236 | 0.483816 | 0.518375 |

|             |          |                                                                                          |           |          |          |          |
|-------------|----------|------------------------------------------------------------------------------------------|-----------|----------|----------|----------|
|             |          | TM domain), member 3                                                                     |           |          |          |          |
| 222218_s_at | PILRA    | paired immunoglobulin-like type 2 receptor alpha                                         | 29992     | -0.60956 | 0.483919 | 0.518375 |
| 213566_at   | RNASE6   | ribonuclease, RNase A family, k6                                                         | 6039      | -0.53861 | 0.485481 | 0.519227 |
| 221160_s_at | CABP5    | calcium binding protein 5                                                                | 56344     | -0.52004 | 0.487926 | 0.521019 |
| 206964_at   | NAT8B    | N-acetyltransferase 8B (GCN5-related, putative, gene/pseudogene)                         | 51471     | -0.52553 | 0.491589 | 0.523279 |
| 206420_at   | IGSF6    | immunoglobulin superfamily, member 6                                                     | 10261     | -0.58815 | 0.495872 | 0.52701  |
| 219386_s_at | SLAMF8   | SLAM family member 8                                                                     | 56833     | -0.64079 | 0.500574 | 0.531173 |
| 209949_at   | NCF2     | neutrophil cytosolic factor 2                                                            | 4688      | -0.64425 | 0.501391 | 0.531207 |
| 206110_at   | HIST1H3H | histone cluster 1, H3h                                                                   | 8357      | -0.78197 | 0.502267 | 0.531304 |
| 210660_at   | LILRA1   | leukocyte immunoglobulin-like receptor, subfamily A (with TM domain), member 1           | 11024     | -0.51819 | 0.518847 | 0.547986 |
| 203560_at   | GGH      | gamma-glutamyl hydrolase (conjugase, foylpolypolygammaglutamyl hydrolase)                | 8836      | -0.53164 | 0.520075 | 0.548428 |
| 214677_x_at | CYAT1    | immunoglobulin lambda light chain-like                                                   | 100290481 | -0.49954 | 0.537027 | 0.564546 |
| 211985_s_at | CALM1    | calmodulin 1 (phosphorylase kinase, delta)                                               | 801       | -0.5249  | 0.539781 | 0.566561 |
| 200660_at   | S100A11  | S100 calcium binding protein A11                                                         | 6282      | -0.57564 | 0.542655 | 0.568696 |
| 201279_s_at | DAB2     | Dab, mitogen-responsive phosphoprotein, homolog 2 (Drosophila)                           | 1601      | -0.47879 | 0.546344 | 0.571676 |
| 203585_at   | ZNF185   | zinc finger protein 185 (LIM domain)                                                     | 7739      | -0.5405  | 0.548693 | 0.573249 |
| 203140_at   | BCL6     | B-cell CLL/lymphoma 6                                                                    | 604       | -0.48632 | 0.5566   | 0.580552 |
| 202295_s_at | CTSH     | cathepsin H                                                                              | 1512      | -0.54025 | 0.557399 | 0.580552 |
| 210146_x_at | LILRB2   | leukocyte immunoglobulin-like receptor, subfamily B (with TM and ITIM domains), member 2 | 10288     | -0.42185 | 0.572195 | 0.593923 |
| 212188_at   | KCTD12   | potassium channel tetramerisation domain containing 12                                   | 115207    | -0.40898 | 0.572868 | 0.593923 |
| 203973_s_at | CEBPD    | CCAAT/enhancer binding protein (C/EBP), delta                                            | 1052      | -0.50468 | 0.574596 | 0.594804 |
| 204588_s_at | SLC7A7   | solute carrier family 7 (amino acid transporter light chain, y+L system), member 7       | 9056      | -0.52401 | 0.57568  | 0.595016 |
| 218232_at   | C1QA     | complement component 1, q subcomponent, A chain                                          | 712       | -0.45679 | 0.578484 | 0.597002 |
| 219159_s_at | SLAMF7   | SLAM family member 7                                                                     | 57823     | -0.41122 | 0.581677 | 0.599384 |
| 209448_at   | HTATIP2  | HIV-1 Tat interactive protein 2, 30kDa                                                   | 10553     | -0.4519  | 0.584526 | 0.601404 |
| 208450_at   | LGALS2   | lectin, galactoside-binding, soluble, 2                                                  | 3957      | -0.61288 | 0.591141 | 0.607288 |
| 207857_at   | LILRA2   | leukocyte immunoglobulin-like receptor, subfamily A (with TM domain), member 2           | 11027     | -0.38829 | 0.612701 | 0.626584 |
| 220088_at   | C5AR1    | complement component 5a receptor 1                                                       | 728       | -0.41369 | 0.614585 | 0.627563 |

|             |           |                                                        |        |          |          |          |
|-------------|-----------|--------------------------------------------------------|--------|----------|----------|----------|
| 204912_at   | IL10RA    | interleukin 10 receptor, alpha                         | 3587   | -0.36301 | 0.677582 | 0.688773 |
| 201005_at   | CD9       | CD9 molecule                                           | 928    | -0.46299 | 0.696997 | 0.707447 |
| 205119_s_at | FPR1      | formyl peptide receptor 1                              | 2357   | -0.34184 | 0.703731 | 0.713213 |
| 213831_at   | HLA-DQA1  | major histocompatibility complex, class II, DQ alpha 1 | 3117   | -0.41115 | 0.757666 | 0.766726 |
| 205898_at   | CX3CR1    | chemokine (C-X3-C motif) receptor 1                    | 1524   | -0.2373  | 0.789441 | 0.797689 |
| 201422_at   | IFI30     | interferon, gamma-inducible protein 30                 | 10437  | -0.26145 | 0.793548 | 0.800643 |
| 208579_x_at | H2BFS     | H2B histone family, member S (pseudogene)              | 54145  | -0.20818 | 0.82651  | 0.83266  |
| 212192_at   | KCTD12    | potassium channel tetramerisation domain containing 12 | 115207 | -0.19775 | 0.828056 | 0.832977 |
| 219505_at   | CECR1     | cat eye syndrome chromosome region, candidate 1        | 51816  | -0.18017 | 0.84442  | 0.848178 |
| 215071_s_at | HIST1H2AC | histone cluster 1, H2ac                                | 8334   | -0.16128 | 0.864886 | 0.867448 |

**Table S3. Primer/probe sets of the genes used for Q-RT-PCR validation of the microarray results.**

| <b>ABI GEX<br/>Assay ID</b> | <b>Gene<br/>Symbol</b> | <b>Gene Name</b>                                | <b>GEX Target Exon<br/>Boundaries</b> |
|-----------------------------|------------------------|-------------------------------------------------|---------------------------------------|
| Hs00188259_m1               | WARS                   | tryptophanyl-tRNA synthetase                    | 9-10                                  |
| Hs99999139_m1               | TIMP1                  | TIMP metalloproteinase inhibitor 1              | 2-3                                   |
| Hs00180737_m1               | HPSE                   | heparanase                                      | 8-9                                   |
| Hs00172743_m1               | DNTT                   | deoxynucleotidyltransferase, terminal           | 10-11                                 |
| Hs00181810_m1               | CRHBP                  | corticotropin releasing hormone binding protein | 6-7                                   |
| Hs00365956_m1               | HOXA9                  | homeobox A9                                     | 1-2                                   |
| Hs00202825_m1               | SSBP2                  | single-stranded DNA binding protein 2           | 7-8                                   |
| Hs00261238_m1               | HOPX                   | HOP homeobox                                    | 2-3                                   |
| Hs99999905_m1               | GAPDH                  | glyceraldehyde-3-phosphate dehydrogenase        | 3-3                                   |
| 000397                      | miR-21                 | Human microRNA-21 (hsa-miR-21-5p)               | N/A                                   |
| 001093                      | RNU6B                  | U6 small nuclear 2, small nuclear RNA           | N/A                                   |



Table S4. Genes concordantly deregulated by both men and women patients.

| <i>Probeset ID</i> | <i>Symbol (Na32<br/>consensus<br/>Mar13)</i> | <i>Gene Title (Na32 consensus Mar13)</i> | <i>GeneID<br/>(consensus1<br/>Mar-13)</i> | <i>Log2(FC)</i> | <i>P-<br/>Value</i> | <i>Adjusted<br/>p-Value</i> |
|--------------------|----------------------------------------------|------------------------------------------|-------------------------------------------|-----------------|---------------------|-----------------------------|
|--------------------|----------------------------------------------|------------------------------------------|-------------------------------------------|-----------------|---------------------|-----------------------------|

|             |          |                                                                                               |       |          |        |         |
|-------------|----------|-----------------------------------------------------------------------------------------------|-------|----------|--------|---------|
| 202627_s_at | SERPINE1 | serpin peptidase inhibitor, clade E (nexin, plasminogen activator inhibitor type 1), member 1 | 5054  | 1.668478 | 0.005  | 0.45412 |
| 201324_at   | EMP1     | epithelial membrane protein 1                                                                 | 2012  | 1.16186  | 0.0077 | 0.45412 |
| 212667_at   | SPARC    | secreted protein, acidic, cysteine-rich (osteonectin)                                         | 6678  | 1.45459  | 0.0147 | 0.45412 |
| 201438_at   | COL6A3   | collagen, type VI, alpha 3                                                                    | 1293  | 1.278559 | 0.0258 | 0.45412 |
| 211161_s_at | COL3A1   | collagen, type III, alpha 1                                                                   | 1281  | 1.254327 | 0.0296 | 0.45412 |
| 215076_s_at | COL3A1   | collagen, type III, alpha 1                                                                   | 1281  | 1.488017 | 0.03   | 0.45412 |
| 210809_s_at | POSTN    | periostin, osteoblast specific factor                                                         | 10631 | 1.804584 | 0.0358 | 0.45412 |
| 212464_s_at | FN1      | fibronectin 1                                                                                 | 2335  | 1.813392 | 0.0368 | 0.45412 |
| 202404_s_at | COL1A2   | collagen, type III, alpha 1                                                                   | 1281  | 1.791759 | 0.038  | 0.45412 |
| 202403_s_at | COL1A2   | collagen, type III, alpha 1                                                                   | 1281  | 1.442683 | 0.043  | 0.45412 |
| 211719_x_at | FN1      | fibronectin 1                                                                                 | 2335  | 1.960598 | 0.0434 | 0.45412 |
| 216442_x_at | FN1      | fibronectin 1                                                                                 | 2335  | 1.658895 | 0.0472 | 0.45412 |
| 210495_x_at | FN1      | fibronectin 1                                                                                 | 2335  | 1.692178 | 0.0472 | 0.45412 |
| 211964_at   | COL4A2   | collagen, type IV, alpha 2                                                                    | 1284  | 1.078275 | 0.0537 | 0.46673 |
| 202310_s_at | COL1A1   | collagen, type I, alpha 1                                                                     | 1277  | 1.496322 | 0.056  | 0.46673 |
| 217388_s_at | KYNU     | kynureninase                                                                                  | 8942  | -1.22118 | 0.0727 | 0.47094 |
| 217232_x_at | HBB      | hemoglobin, beta                                                                              | 3043  | -1.35066 | 0.0734 | 0.47094 |
| 205547_s_at | TAGLN    | transgelin                                                                                    | 6876  | 1.275409 | 0.0758 | 0.47094 |
|             | HBG1 /// |                                                                                               |       |          |        |         |
| 204848_x_at | HBG2     | hemoglobin, gamma A                                                                           | 3047  | -1.4219  | 0.0773 | 0.47094 |
| 211980_at   | COL4A1   | collagen, type IV, alpha 1                                                                    | 1282  | 1.083935 | 0.082  | 0.47094 |
| 209116_x_at | HBB      | hemoglobin, beta                                                                              | 3043  | -1.47367 | 0.0876 | 0.47094 |
|             | HBG1 /// |                                                                                               |       |          |        |         |
| 213515_x_at | HBG2     | hemoglobin, gamma A                                                                           | 3047  | -1.72304 | 0.0895 | 0.47094 |
|             |          | EGF containing fibulin-like extracellular matrix protein 1                                    |       |          |        |         |
| 201842_s_at | EFEMP1   | protein 1                                                                                     | 2202  | 1.153114 | 0.09   | 0.47094 |
| 204897_at   | PTGER4   | prostaglandin E receptor 4 (subtype EP4)                                                      | 5734  | 0.979697 | 0.0942 | 0.47094 |
| 209183_s_at | C10orf10 | chromosome 10 open reading frame 10                                                           | 11067 | 0.631696 | 0.0942 | 0.47094 |
|             | HBG1 /// |                                                                                               |       |          |        |         |
| 204419_x_at | HBG2     | hemoglobin, gamma A                                                                           | 3047  | -1.4151  | 0.1059 | 0.50908 |
| 211696_x_at | HBB      | hemoglobin, beta                                                                              | 3043  | -1.18995 | 0.112  | 0.51362 |
| 204141_at   | TUBB2A   | tubulin, beta 2A class IIa                                                                    | 7280  | 1.288228 | 0.116  | 0.51362 |
| 211699_x_at | HBA1 /// | hemoglobin, alpha 1                                                                           | 3039  | -1.21697 | 0.1224 | 0.51362 |
| 209458_x_at | HBA1 /// | hemoglobin, alpha 1                                                                           | 3039  | -1.38137 | 0.1306 | 0.51362 |

|             |               |                                                                                   |       |          |        |         |
|-------------|---------------|-----------------------------------------------------------------------------------|-------|----------|--------|---------|
| 221760_at   | MAN1A1        | mannosidase, alpha, class 1A, member 1                                            | 4121  | 0.85605  | 0.1307 | 0.51362 |
| 204018_x_at | HBA1 /// HBA2 | hemoglobin, alpha 1                                                               | 3039  | -1.23966 | 0.1315 | 0.51362 |
| 213350_at   | RPS11         | ribosomal protein S11                                                             | 6205  | 0.933771 | 0.1365 | 0.51563 |
| 215772_x_at | SUCLG2        | succinate-CoA ligase, GDP-forming, beta subunit                                   | 8801  | -0.64738 | 0.1459 | 0.51563 |
| 217414_x_at | HBA1 /// HBA2 | hemoglobin, alpha 1                                                               | 3039  | -1.27841 | 0.1498 | 0.51563 |
| 205382_s_at | CFD           | complement factor D (adipsin)                                                     | 1675  | -0.8048  | 0.1571 | 0.51563 |
| 201890_at   | RRM2          | ribonucleotide reductase M2                                                       | 6241  | -0.95289 | 0.1584 | 0.51563 |
| 208960_s_at | KLF6          | Kruppel-like factor 6                                                             | 1316  | 0.571081 | 0.1595 | 0.51563 |
| 206157_at   | PTX3          | pentraxin 3, long                                                                 | 5806  | 0.825089 | 0.1609 | 0.51563 |
| 205237_at   | FCN1          | ficolin (collagen/fibrinogen domain containing) 1                                 | 2219  | -1.15146 | 0.1702 | 0.51686 |
| 204834_at   | FGL2          | fibrinogen-like 2                                                                 | 10875 | -0.90858 | 0.1719 | 0.51686 |
| 211745_x_at | HBA1 /// HBA2 | hemoglobin, alpha 1                                                               | 3039  | -1.33507 | 0.1737 | 0.51686 |
| 209803_s_at | PHLDA2        | pleckstrin homology-like domain, family A, member 2                               | 7262  | 0.879169 | 0.18   | 0.52092 |
| 200629_at   | WARS          | tryptophanyl-tRNA synthetase<br>piezo-type mechanosensitive ion channel component | 7453  | -0.69785 | 0.184  | 0.52092 |
| 219602_s_at | PIEZO2        | 2                                                                                 | 63895 | -0.56733 | 0.1875 | 0.52092 |
| 205848_at   | GAS2          | growth arrest-specific 2                                                          | 2620  | -0.77375 | 0.1965 | 0.52799 |
| 210487_at   | DNTT          | deoxynucleotidyltransferase, terminal                                             | 1791  | 0.622562 | 0.1985 | 0.52799 |
| 214414_x_at | HBA1 /// HBA2 | hemoglobin, alpha 1                                                               | 3039  | -1.40997 | 0.2155 | 0.56124 |
| 209374_s_at | IGHM          | immunoglobulin heavy constant mu                                                  | 3507  | 0.614952 | 0.2261 | 0.57678 |
| 201110_s_at | THBS1         | thrombospondin 1                                                                  | 7057  | 0.617073 | 0.251  | 0.58604 |
| 220377_at   | KIAA0125      | KIAA0125                                                                          | 9834  | 0.553273 | 0.2511 | 0.58604 |
| 213524_s_at | GOS2          | G0/G1switch 2                                                                     | 50486 | -0.85706 | 0.2656 | 0.58604 |
| 204304_s_at | PROM1         | prominin 1                                                                        | 8842  | 0.705885 | 0.27   | 0.58604 |
| 208961_s_at | KLF6          | Kruppel-like factor 6                                                             | 1316  | 0.50248  | 0.2729 | 0.58604 |
| 203787_at   | SSBP2         | single-stranded DNA binding protein 2                                             | 23635 | 0.483855 | 0.2743 | 0.58604 |
| 212952_at   | LOC100507328  | hypothetical LOC100507328                                                         | 1E+08 | 0.637258 | 0.2765 | 0.58604 |
| 209763_at   | CHRD1         | chordin-like 1                                                                    | 91851 | 0.393371 | 0.2787 | 0.58604 |
| 202600_s_at | NRIP1         | nuclear receptor interacting protein 1                                            | 8204  | 0.586587 | 0.2792 | 0.58604 |
| 209290_s_at | NFIB          | nuclear factor I/B                                                                | 4781  | -0.55308 | 0.2809 | 0.58604 |
| 214041_x_at | RPL37A        | ribosomal protein L37a                                                            | 6168  | 0.490226 | 0.2835 | 0.58604 |
| 202237_at   | NNMT          | nicotinamide N-methyltransferase                                                  | 4837  | 0.748218 | 0.286  | 0.58604 |
| 211074_at   | FOLR1         | folate receptor 1 (adult)                                                         | 2348  | 0.905935 | 0.3061 | 0.61707 |
| 204872_at   | TLE4          | transducin-like enhancer of split 4 (E(sp1) homolog,                              | 7091  | 0.422998 | 0.3313 | 0.65741 |

## Drosophila)

|             |             |                                                                                         |        |          |        |         |
|-------------|-------------|-----------------------------------------------------------------------------------------|--------|----------|--------|---------|
| 217683_at   | HBE1        | hemoglobin, epsilon 1                                                                   | 3046   | -0.47414 | 0.3666 | 0.68713 |
| 205933_at   | SETBP1      | SET binding protein 1                                                                   | 26040  | 0.325978 | 0.3682 | 0.68713 |
| 204430_s_at | SLC2A5      | solute carrier family 2 (facilitated glucose/fructose transporter), member 5            | 6518   | 0.430164 | 0.3789 | 0.68713 |
| 209894_at   | LEPR        | leptin receptor                                                                         | 3953   | -0.51789 | 0.379  | 0.68713 |
| 221556_at   | CDC14B      | cell division cycle 14B                                                                 | 8555   | 0.488325 | 0.3791 | 0.68713 |
| 202870_s_at | CDC20       | cell division cycle 20                                                                  | 991    | -0.50504 | 0.3793 | 0.68713 |
| 204755_x_at | HLF         | hepatic leukemia factor                                                                 | 3131   | 0.315735 | 0.4259 | 0.75009 |
| 209576_at   | GNAI1       | guanine nucleotide binding protein (G protein), alpha inhibiting activity polypeptide 1 | 2770   | 0.312521 | 0.4427 | 0.75009 |
| 204030_s_at | IQCJ-SCHIP1 | IQCJ-SCHIP1 readthrough                                                                 | 1E+08  | 0.349599 | 0.4474 | 0.75009 |
| 213979_s_at | ---         | ---                                                                                     | ---    | 0.43757  | 0.4482 | 0.75009 |
| 203535_at   | S100A9      | S100 calcium binding protein A9                                                         | 6280   | -0.55271 | 0.4611 | 0.75009 |
| 216248_s_at | NR4A2       | nuclear receptor subfamily 4, group A, member 2                                         | 4929   | -0.44972 | 0.465  | 0.75009 |
| 211597_s_at | HOPX        | HOP homeobox                                                                            | 84525  | 0.403732 | 0.4669 | 0.75009 |
| 204622_x_at | NR4A2       | nuclear receptor subfamily 4, group A, member 2                                         | 4929   | -0.37372 | 0.4687 | 0.75009 |
| 220990_s_at | MIR21       | microRNA 21                                                                             | 406991 | 0.336172 | 0.4696 | 0.75009 |
| 213668_s_at | SOX4        | SRY (sex determining region Y)-box 4                                                    | 6659   | 0.449329 | 0.4741 | 0.75009 |
| 205984_at   | CRHBP       | corticotropin releasing hormone binding protein                                         | 1393   | 0.377363 | 0.5185 | 0.80784 |
| 209773_s_at | RRM2        | ribonucleotide reductase M2                                                             | 6241   | -0.42832 | 0.5282 | 0.80784 |
| 201058_s_at | MYL9        | myosin, light chain 9, regulatory                                                       | 10398  | 0.492397 | 0.5381 | 0.80784 |
| 201631_s_at | IER3        | immediate early response 3                                                              | 8870   | 0.438819 | 0.5428 | 0.80784 |
| 219777_at   | GIMAP6      | GTPase, IMAP family member 6                                                            | 474344 | 0.266496 | 0.5488 | 0.80784 |
| 212077_at   | CALD1       | caldesmon 1                                                                             | 800    | 0.443992 | 0.5493 | 0.80784 |
| 210873_x_at | APOBEC3A    | apolipoprotein B mRNA editing enzyme, catalytic polypeptide-like 3A                     | 200315 | -0.3463  | 0.5991 | 0.8526  |
| 201669_s_at | MARCKS      | myristoylated alanine-rich protein kinase C substrate                                   | 4082   | -0.26494 | 0.6005 | 0.8526  |
| 206478_at   | KIAA0125    | KIAA0125                                                                                | 9834   | 0.32879  | 0.6097 | 0.8526  |
| 201666_at   | TIMP1       | TIMP metalloproteinase inhibitor 1                                                      | 7076   | 0.267758 | 0.6197 | 0.8526  |
| 219304_s_at | PDGFD       | platelet derived growth factor D                                                        | 80310  | 0.204115 | 0.624  | 0.8526  |
| 212531_at   | LCN2        | lipocalin 2                                                                             | 3934   | 0.323764 | 0.6246 | 0.8526  |
| 212589_at   | RRAS2       | related RAS viral (r-ras) oncogene homolog 2                                            | 22800  | -0.24032 | 0.63   | 0.8526  |
| 206698_at   | XK          | X-linked Kx blood group (McLeod syndrome)                                               | 7504   | -0.27856 | 0.6343 | 0.8526  |

|             |            |                                                                                                   |        |          |        |         |
|-------------|------------|---------------------------------------------------------------------------------------------------|--------|----------|--------|---------|
| 209069_s_at | H3F3B      | H3 histone, family 3B (H3.3B)                                                                     | 3021   | 0.19436  | 0.6415 | 0.85308 |
| 213593_s_at | TRA2A      | transformer 2 alpha homolog (Drosophila)                                                          | 29896  | 0.256365 | 0.6504 | 0.85581 |
| 222044_at   | PCIF1      | PDX1 C-terminal inhibiting factor 1                                                               | 63935  | 0.1951   | 0.6678 | 0.86141 |
| 201798_s_at | MYOF       | myoferlin                                                                                         | 26509  | 0.273459 | 0.6685 | 0.86141 |
| 201369_s_at | ZFP36L2    | ZFP36 ring finger protein-like 2                                                                  | 678    | 0.230642 | 0.6846 | 0.86907 |
| 211998_at   | H3F3B      | H3 histone, family 3B (H3.3B)                                                                     | 3021   | 0.193469 | 0.6932 | 0.86907 |
| 214974_x_at | CXCL5      | chemokine (C-X-C motif) ligand 5                                                                  | 6374   | -0.26165 | 0.6953 | 0.86907 |
| 200999_s_at | CKAP4      | cytoskeleton-associated protein 4                                                                 | 10970  | 0.213798 | 0.709  | 0.87669 |
| 208180_s_at | HIST1H4H   | histone cluster 1, H4h                                                                            | 8365   | 0.215184 | 0.7256 | 0.87669 |
| 214651_s_at | HOXA9      | homeobox A9                                                                                       | 3205   | 0.201432 | 0.7276 | 0.87669 |
| 204563_at   | SELL       | selectin L                                                                                        | 6402   | 0.218847 | 0.7294 | 0.87669 |
| 74694_s_at  | RABEP2     | rabaptin, RAB GTPase binding effector protein 2                                                   | 79874  | 0.156251 | 0.7423 | 0.8796  |
| 209112_at   | CDKN1B     | cyclin-dependent kinase inhibitor 1B (p27, Kip1)                                                  | 1027   | -0.16341 | 0.7463 | 0.8796  |
| 220416_at   | ATP8B4     | ATPase, class I, type 8B, member 4                                                                | 79895  | 0.16502  | 0.7529 | 0.8796  |
| 1405_i_at   | CCL5       | chemokine (C-C motif) ligand 5                                                                    | 6352   | -0.25823 | 0.7902 | 0.89548 |
| 201195_s_at | SLC7A5     | solute carrier family 7 (amino acid transporter light chain, L system), member 5                  | 8140   | -0.13019 | 0.7977 | 0.89548 |
| 205442_at   | MFAP3L     | microfibrillar-associated protein 3-like                                                          | 9848   | 0.165446 | 0.7982 | 0.89548 |
| 214911_s_at | BRD2       | bromodomain containing 2                                                                          | 6046   | 0.126061 | 0.8026 | 0.89548 |
| 203395_s_at | HES1       | hairy and enhancer of split 1, (Drosophila)                                                       | 3280   | -0.15322 | 0.8083 | 0.89548 |
| 213757_at   | EIF5A      | eukaryotic translation initiation factor 5A                                                       | 1984   | 0.139559 | 0.8106 | 0.89548 |
| 204655_at   | CCL5       | chemokine (C-C motif) ligand 5                                                                    | 6352   | -0.23378 | 0.8167 | 0.89548 |
| 208892_s_at | DUSP6      | dual specificity phosphatase 6                                                                    | 1848   | 0.125339 | 0.8394 | 0.91234 |
| 214805_at   | EIF4A1     | eukaryotic translation initiation factor 4A1                                                      | 1973   | 0.086848 | 0.8471 | 0.91278 |
| 208835_s_at | LUC7L3     | LUC7-like 3 ( <i>S. cerevisiae</i> )                                                              | 51747  | 0.092821 | 0.8544 | 0.91281 |
|             | CCL3 ///   |                                                                                                   |        |          |        |         |
|             | CCL3L1 /// |                                                                                                   |        |          |        |         |
| 205114_s_at | CCL3L3     | chemokine (C-C motif) ligand 3-like 3<br>latent transforming growth factor beta binding protein 3 | 414062 | 0.116024 | 0.8826 | 0.93496 |
| 219922_s_at | LTBP3      | latent transforming growth factor beta binding protein 3                                          | 4054   | -0.06412 | 0.8939 | 0.93622 |
| 207815_at   | PF4V1      | platelet factor 4 variant 1                                                                       | 5197   | -0.10475 | 0.8988 | 0.93622 |
| 208949_s_at | LGALS3     | lectin, galactoside-binding, soluble, 3                                                           | 3958   | -0.06541 | 0.9175 | 0.94106 |
| 203394_s_at | HES1       | hairy and enhancer of split 1, (Drosophila)                                                       | 3280   | -0.06134 | 0.9229 | 0.94106 |
| 204753_s_at | HLF        | hepatic leukemia factor                                                                           | 3131   | 0.037675 | 0.933  | 0.94106 |

|             |         |                           |       |          |        |         |
|-------------|---------|---------------------------|-------|----------|--------|---------|
| 219410_at   | TMEM45A | transmembrane protein 45A | 55076 | 0.044462 | 0.9335 | 0.94106 |
| 219403_s_at | HPSE    | heparanase                | 10855 | -0.01752 | 0.9787 | 0.97868 |

Table S5a. Genes differentially regulated by the 12 PV patients with an indolent phenotype.

| <b>ProbesetID</b> | <b>Symbol<br/>(Na32<br/>consensus<br/>Mar13)</b> | <b>Gene Title (Na32 consensus Mar13)</b>                    | <b>Entrez<br/>GeneID<br/>(consensus<br/>Mar-13)</b> | <b>Log2(FC)</b> | <b>P-Value</b> | <b>Adjusted<br/>P-Value</b> |
|-------------------|--------------------------------------------------|-------------------------------------------------------------|-----------------------------------------------------|-----------------|----------------|-----------------------------|
| 208949_s_at       | LGALS3                                           | lectin, galactoside-binding, soluble, 3                     | 3958                                                | -2.46116        | 4.71E-07       | 0.000871                    |
| 202284_s_at       | CDKN1A                                           | cyclin-dependent kinase inhibitor 1A (p21, Cip1)            | 1026                                                | -1.98698        | 2.11E-06       | 0.002134                    |
| 201059_at         | CTTN                                             | cortactin                                                   | 2017                                                | -2.72585        | 6.06E-06       | 0.002867                    |
| 211458_s_at       | GABARAPL1                                        | GABA(A) receptor-associated protein like 1                  | 23710                                               | -1.79927        | 1.03E-05       | 0.003369                    |
| 210592_s_at       | SAT1                                             | spermidine/spermine N1-acetyltransferase 1                  | 6303                                                | -1.22693        | 1.17E-05       | 0.003384                    |
| 201666_at         | TIMP1                                            | TIMP metalloproteinase inhibitor 1                          | 7076                                                | -1.63942        | 2.35E-05       | 0.004281                    |
| 203045_at         | NINJ1                                            | ninjurin 1                                                  | 4814                                                | -1.5136         | 2.55E-05       | 0.004462                    |
| 203455_s_at       | SAT1                                             | spermidine/spermine N1-acetyltransferase 1                  | 6303                                                | -1.25184        | 2.78E-05       | 0.004519                    |
| 202912_at         | ADM                                              | adrenomedullin                                              | 133                                                 | -1.55855        | 3.02E-05       | 0.004672                    |
| 201058_s_at       | MYL9                                             | myosin, light chain 9, regulatory                           | 10398                                               | -2.74637        | 3.07E-05       | 0.004672                    |
| 207815_at         | PF4V1                                            | platelet factor 4 variant 1                                 | 5197                                                | -2.82239        | 5.35E-05       | 0.005828                    |
| 1405_i_at         | CCL5                                             | chemokine (C-C motif) ligand 5                              | 6352                                                | -3.32637        | 5.85E-05       | 0.006036                    |
| 214211_at         | FTH1                                             | ferritin, heavy polypeptide 1                               | 2495                                                | -1.47129        | 8.74E-05       | 0.006826                    |
| 201422_at         | IFI30                                            | interferon, gamma-inducible protein 30                      | 10437                                               | -2.1056         | 0.000104       | 0.00745                     |
| 210845_s_at       | PLAUR                                            | plasminogen activator, urokinase receptor                   | 5329                                                | -1.48981        | 0.000116       | 0.007613                    |
| 214020_x_at       | ITGB5                                            | integrin, beta 5                                            | 3693                                                | -1.08903        | 0.000121       | 0.007815                    |
| 204115_at         | GNG11                                            | guanine nucleotide binding protein (G protein), gamma 11    | 2791                                                | -2.43614        | 0.000123       | 0.007906                    |
| 213524_s_at       | G0S2                                             | G0/G1switch 2                                               | 50486                                               | -2.65615        | 0.000126       | 0.007998                    |
| 201125_s_at       | ITGB5                                            | integrin, beta 5                                            | 3693                                                | -1.67473        | 0.000134       | 0.008224                    |
| 209154_at         | TAX1BP3                                          | Tax1 (human T-cell leukemia virus type I) binding protein 3 | 30851                                               | -1.71214        | 0.000155       | 0.008862                    |
| 201631_s_at       | IER3                                             | immediate early response 3                                  | 8870                                                | -2.29781        | 0.000169       | 0.009257                    |
| 213988_s_at       | SAT1                                             | spermidine/spermine N1-acetyltransferase 1                  | 6303                                                | -1.26095        | 0.000171       | 0.009309                    |
| 200871_s_at       | PSAP                                             | prosaposin                                                  | 5660                                                | -1.0306         | 0.000195       | 0.009761                    |
| 200661_at         | CTSA                                             | cathepsin A                                                 | 5476                                                | -1.96591        | 0.000218       | 0.010227                    |
| 204440_at         | CD83                                             | CD83 molecule                                               | 9308                                                | -1.34989        | 0.000228       | 0.010503                    |

|                        |           |                                                                        |       |          |          |          |
|------------------------|-----------|------------------------------------------------------------------------|-------|----------|----------|----------|
| 214073_at              | CTTN      | cortactin                                                              | 2017  | -2.15431 | 0.000231 | 0.010534 |
| 204655_at              | CCL5      | chemokine (C-C motif) ligand 5                                         | 6352  | -3.23424 | 0.000234 | 0.010534 |
| 219622_at              | RAB20     | RAB20, member RAS oncogene family                                      | 55647 | -1.10241 | 0.000283 | 0.011722 |
| 204546_at              | KIAA0513  | KIAA0513                                                               | 9764  | -1.19275 | 0.000321 | 0.012541 |
| 209304_x_at            | GADD45B   | growth arrest and DNA-damage-inducible, beta                           | 4616  | -1.51931 | 0.000364 | 0.013369 |
| 203535_at              | S100A9    | S100 calcium binding protein A9                                        | 6280  | -2.4352  | 0.00037  | 0.013372 |
| 210075_at              | MARCH2    | membrane-associated ring finger (C3HC4) 2, E3 ubiquitin protein ligase | 51257 | -1.72415 | 0.00043  | 0.014432 |
| 213716_s_at            | SECTM1    | secreted and transmembrane 1                                           | 6398  | -1.05168 | 0.000482 | 0.015364 |
| 209398_at              | HIST1H1C  | histone cluster 1, H1c                                                 | 3006  | -1.53845 | 0.000487 | 0.015374 |
| 214246_x_at            | MINK1     | misshapen-like kinase 1                                                | 50488 | -1.16871 | 0.000487 | 0.015374 |
| 204482_at              | CLDN5     | claudin 5                                                              | 7122  | -1.62602 | 0.000494 | 0.015531 |
| 206110_at              | HIST1H3H  | histone cluster 1, H3h                                                 | 8357  | -2.52014 | 0.000496 | 0.015566 |
| 200736_s_at            | GPX1      | glutathione peroxidase 1                                               | 2876  | -1.14943 | 0.000508 | 0.015789 |
| 31874_at               | GAS2L1    | growth arrest-specific 2 like 1                                        | 10634 | -1.87076 | 0.00052  | 0.016031 |
| 217764_s_at            | RAB31     | RAB31, member RAS oncogene family                                      | 11031 | -2.01066 | 0.000564 | 0.016422 |
| AFFX-                  |           |                                                                        |       |          |          |          |
| HUMISGF3A/M97935_MA_at | STAT1     | signal transducer and activator of transcription 1, 91kDa              | 6772  | -1.37938 | 0.000621 | 0.016996 |
| 212501_at              | CEBPB     | CCAAT/enhancer binding protein (C/EBP), beta                           | 1051  | -1.54731 | 0.000671 | 0.017573 |
| 212077_at              | CALD1     | caldesmon 1                                                            | 800   | -2.04255 | 0.000688 | 0.017825 |
| 201108_s_at            | THBS1     | thrombospondin 1                                                       | 7057  | -2.12731 | 0.000718 | 0.018258 |
| 212647_at              | RRAS      | related RAS viral (r-ras) oncogene homolog                             | 6237  | -1.08906 | 0.000785 | 0.019036 |
| 205463_s_at            | PDGFA     | platelet-derived growth factor alpha polypeptide                       | 5154  | -1.5857  | 0.000872 | 0.020261 |
| 202083_s_at            | SEC14L1   | SEC14-like 1 (S. cerevisiae)                                           | 6397  | -1.38339 | 0.000926 | 0.020823 |
| 221211_s_at            | MAP3K7CL  | MAP3K7 C-terminal like                                                 | 56911 | -1.90471 | 0.000937 | 0.020912 |
| 221059_s_at            | COTL1     | coactosin-like 1 (Dictyostelium)                                       | 23406 | -1.53392 | 0.000965 | 0.021237 |
| 201743_at              | CD14      | CD14 molecule                                                          | 929   | -2.10963 | 0.00106  | 0.022456 |
| 218999_at              | TMEM140   | transmembrane protein 140                                              | 55281 | -1.58682 | 0.001078 | 0.022646 |
| 218032_at              | SNN       | stannin                                                                | 8303  | -1.79738 | 0.001083 | 0.022694 |
| 201739_at              | SGK1      | serum/glucocorticoid regulated kinase 1                                | 6446  | -2.23217 | 0.001109 | 0.02284  |
| 203234_at              | UPP1      | uridine phosphorylase 1                                                | 7378  | -1.24029 | 0.001155 | 0.023122 |
| 215071_s_at            | HIST1H2AC | histone cluster 1, H2ac                                                | 8334  | -2.0219  | 0.001169 | 0.02321  |
| 202497_x_at            | SLC2A3    | solute carrier family 2 (facilitated glucose transporter), member 3    | 6515  | -1.11253 | 0.001169 | 0.02321  |



|                                     |          |                                                                                                             |        |          |          |          |
|-------------------------------------|----------|-------------------------------------------------------------------------------------------------------------|--------|----------|----------|----------|
| 207574_s_at<br>AFFX-                | GADD45B  | growth arrest and DNA-damage-inducible, beta                                                                | 4616   | -1.91282 | 0.001288 | 0.024289 |
| HUMISGF3A/M97935_MB_at<br>203414_at | STAT1    | signal transducer and activator of transcription 1, 91kDa                                                   | 6772   | -1.22837 | 0.001313 | 0.024575 |
| 204081_at                           | MMD      | monocyte to macrophage differentiation-associated                                                           | 23531  | -1.96502 | 0.001341 | 0.024732 |
| 212242_at                           | NRGN     | neurogranin (protein kinase C substrate, RC3)                                                               | 4900   | -2.55869 | 0.001354 | 0.024788 |
| 211600_at                           | TUBA4A   | tubulin, alpha 4a                                                                                           | 7277   | -1.98963 | 0.001384 | 0.025003 |
| 211252_x_at                         | PTPRO    | protein tyrosine phosphatase, receptor type, O                                                              | 5800   | -1.25519 | 0.001385 | 0.025003 |
| 210357_s_at                         | PTCRA    | pre T-cell antigen receptor alpha                                                                           | 171558 | -1.20925 | 0.001454 | 0.025618 |
| 214696_at                           | SMOX     | spermine oxidase                                                                                            | 54498  | -1.0824  | 0.00148  | 0.025958 |
| 201506_at                           | MIR22HG  | MIR22 host gene (non-protein coding)                                                                        | 84981  | -1.24889 | 0.001532 | 0.026408 |
| 215464_s_at                         | TGFBI    | transforming growth factor, beta-induced, 68kDa                                                             | 7045   | -1.47238 | 0.001571 | 0.026812 |
| 203585_at                           | TAX1BP3  | Tax1 (human T-cell leukemia virus type I) binding protein 3                                                 | 30851  | -1.19481 | 0.001588 | 0.026937 |
| 214752_x_at                         | ZNF185   | zinc finger protein 185 (LIM domain)                                                                        | 7739   | -1.63846 | 0.001619 | 0.027302 |
| 216261_at                           | FLNA     | filamin A, alpha                                                                                            | 2316   | -1.19726 | 0.001669 | 0.027658 |
| 209729_at                           | ITGB3    | integrin, beta 3 (platelet glycoprotein IIIa, antigen CD61)                                                 | 3690   | -1.42557 | 0.001715 | 0.028036 |
| 217763_s_at                         | GAS2L1   | growth arrest-specific 2 like 1                                                                             | 10634  | -1.29217 | 0.001761 | 0.02833  |
| 201565_s_at                         | RAB31    | RAB31, member RAS oncogene family<br>inhibitor of DNA binding 2, dominant negative helix-loop-helix protein | 11031  | -1.57464 | 0.001927 | 0.029492 |
| 202499_s_at                         | ID2      | solute carrier family 2 (facilitated glucose transporter),<br>member 3                                      | 3398   | -2.05847 | 0.001931 | 0.029494 |
| 200859_x_at                         | SLC2A3   | member 3                                                                                                    | 6515   | -1.76034 | 0.001995 | 0.030069 |
| 214054_at                           | FLNA     | filamin A, alpha                                                                                            | 2316   | -1.14829 | 0.001998 | 0.030073 |
| 209959_at                           | DOK2     | docking protein 2, 56kDa                                                                                    | 9046   | -1.44762 | 0.002111 | 0.030716 |
| 222043_at                           | NR4A3    | nuclear receptor subfamily 4, group A, member 3                                                             | 8013   | -1.06248 | 0.002113 | 0.030716 |
| 204057_at                           | CLU      | clusterin                                                                                                   | 1191   | -1.24582 | 0.002133 | 0.030796 |
| 210873_x_at                         | IRF8     | interferon regulatory factor 8                                                                              | 3394   | -1.20508 | 0.002179 | 0.031039 |
| 204794_at                           | APOBEC3A | apolipoprotein B mRNA editing enzyme, catalytic<br>polypeptide-like 3A                                      | 200315 | -1.7692  | 0.002336 | 0.032102 |
| 204232_at                           | DUSP2    | dual specificity phosphatase 2                                                                              | 1844   | -1.69252 | 0.002377 | 0.032376 |
| 208792_s_at                         | FCER1G   | Fc fragment of IgE, high affinity I, receptor for; gamma<br>polypeptide                                     | 2207   | -1.80094 | 0.002409 | 0.032561 |
| 207414_s_at                         | CLU      | clusterin                                                                                                   | 1191   | -1.89367 | 0.002436 | 0.032794 |
| 202295_s_at                         | PCSK6    | proprotein convertase subtilisin/kexin type 6                                                               | 5046   | -1.66589 | 0.00258  | 0.034033 |
| 208078_s_at                         | CTSH     | cathepsin H                                                                                                 | 1512   | -1.47757 | 0.002604 | 0.034228 |
|                                     | SIK1     | salt-inducible kinase 1                                                                                     | 150094 | -1.38923 | 0.002612 | 0.034234 |

|             |           |                                                                                     |        |          |          |          |
|-------------|-----------|-------------------------------------------------------------------------------------|--------|----------|----------|----------|
| 204446_s_at | ALOX5     | arachidonate 5-lipoxygenase                                                         | 240    | -1.78576 | 0.002664 | 0.034597 |
| 205863_at   | S100A12   | S100 calcium binding protein A12                                                    | 6283   | -1.44064 | 0.002691 | 0.034786 |
| 212531_at   | LCN2      | lipocalin 2                                                                         | 3934   | -1.74945 | 0.002916 | 0.036334 |
| 204698_at   | ISG20     | interferon stimulated exonuclease gene 20kDa                                        | 3669   | -1.01523 | 0.003089 | 0.037574 |
| 213338_at   | TMEM158   | transmembrane protein 158 (gene/pseudogene)                                         | 25907  | -1.19059 | 0.00326  | 0.038684 |
| 215492_x_at | PTCRA     | pre T-cell antigen receptor alpha                                                   | 171558 | -1.15689 | 0.003318 | 0.038883 |
| 204838_s_at | MLH3      | mutL homolog 3 (E. coli)                                                            | 27030  | -1.4825  | 0.00334  | 0.039    |
| 336_at      | TBXA2R    | thromboxane A2 receptor                                                             | 6915   | -1.13899 | 0.003359 | 0.039168 |
| 203140_at   | BCL6      | B-cell CLL/lymphoma 6                                                               | 604    | -1.30948 | 0.003569 | 0.040549 |
| 220751_s_at | FAXDC2    | fatty acid hydroxylase domain containing 2                                          | 10826  | -1.36    | 0.003658 | 0.041081 |
| 205495_s_at | GNLY      | granulysin                                                                          | 10578  | -1.10567 | 0.003705 | 0.041271 |
| 200660_at   | S100A11   | S100 calcium binding protein A11                                                    | 6282   | -1.62087 | 0.003733 | 0.041423 |
| 211429_s_at | SERPINA1  | serpin peptidase inhibitor, clade A (alpha-1 antiproteinase, antitrypsin), member 1 | 5265   | -1.9862  | 0.003781 | 0.041543 |
| 202917_s_at | S100A8    | S100 calcium binding protein A8                                                     | 6279   | -2.98812 | 0.003874 | 0.041998 |
| 205114_s_at | CCL3L3    | chemokine (C-C motif) ligand 3-like 3                                               | 414062 | -2.11268 | 0.003894 | 0.041998 |
| 212509_s_at | MXRA7     | matrix-remodelling associated 7                                                     | 439921 | -1.13262 | 0.003902 | 0.042016 |
| 204627_s_at | ITGB3     | integrin, beta 3 (platelet glycoprotein IIIa, antigen CD61)                         | 3690   | -2.30401 | 0.003953 | 0.042268 |
| 203922_s_at | CYBB      | cytochrome b-245, beta polypeptide                                                  | 1536   | -1.0925  | 0.004058 | 0.043079 |
| 208180_s_at | HIST1H4H  | histone cluster 1, H4h                                                              | 8365   | -1.58615 | 0.004083 | 0.043185 |
| 205237_at   | FCN1      | ficolin (collagen/fibrinogen domain containing) 1                                   | 2219   | -2.31794 | 0.004143 | 0.043449 |
| 204628_s_at | ITGB3     | integrin, beta 3 (platelet glycoprotein IIIa, antigen CD61)                         | 3690   | -1.63546 | 0.004208 | 0.043687 |
| 201810_s_at | SH3BP5    | SH3-domain binding protein 5 (BTK-associated)                                       | 9467   | -1.35593 | 0.004294 | 0.044285 |
| 204621_s_at | NR4A2     | nuclear receptor subfamily 4, group A, member 2                                     | 4929   | -1.13205 | 0.004407 | 0.044874 |
| 214414_x_at | HBA1      | hemoglobin, alpha 1                                                                 | 3039   | -2.92562 | 0.004429 | 0.044949 |
| 203305_at   | F13A1     | coagulation factor XIII, A1 polypeptide                                             | 2162   | -2.17585 | 0.004493 | 0.045292 |
| 209803_s_at | PHLDA2    | pleckstrin homology-like domain, family A, member 2                                 | 7262   | -1.71861 | 0.00466  | 0.046283 |
| 208161_s_at | ABCC3     | ATP-binding cassette, sub-family C (CFTR/MRP), member 3                             | 8714   | -1.21045 | 0.004758 | 0.046709 |
| 208406_s_at | GRAP2     | GRB2-related adaptor protein 2                                                      | 9402   | -1.26529 | 0.004845 | 0.047046 |
| 209806_at   | HIST1H2BK | histone cluster 1, H2bk                                                             | 85236  | -1.21587 | 0.004905 | 0.047465 |
| 217028_at   | CXCR4     | chemokine (C-X-C motif) receptor 4                                                  | 7852   | -1.25222 | 0.005221 | 0.04911  |
| 218454_at   | PLBD1     | phospholipase B domain containing 1                                                 | 79887  | -1.3316  | 0.005298 | 0.049397 |
| 202833_s_at | SERPINA1  | serpin peptidase inhibitor, clade A (alpha-1 antiproteinase, antitrypsin), member 1 | 5265   | -1.72053 | 0.005347 | 0.049661 |

|                       |         |                                                                |        |          |          |          |
|-----------------------|---------|----------------------------------------------------------------|--------|----------|----------|----------|
| 205220_at             | HCAR3   | hydroxycarboxylic acid receptor 3                              | 8843   | -1.11127 | 0.005534 | 0.050489 |
| 201438_at             | COL6A3  | collagen, type VI, alpha 3                                     | 1293   | -1.45596 | 0.005536 | 0.050489 |
| 221731_x_at           | VCAN    | versican                                                       | 1462   | -2.02316 | 0.005573 | 0.050668 |
| 201360_at             | CST3    | cystatin C                                                     | 1471   | -1.47347 | 0.005761 | 0.051649 |
| AFFX-                 |         |                                                                |        |          |          |          |
| HUMISGF3A/M97935_5_at | STAT1   | signal transducer and activator of transcription 1, 91kDa      | 6772   | -1.22821 | 0.005786 | 0.051736 |
| 204858_s_at           | TYMP    | thymidine phosphorylase                                        | 1890   | -1.19053 | 0.005857 | 0.052078 |
| 205547_s_at           | TAGLN   | transgelin                                                     | 6876   | -1.89687 | 0.006205 | 0.053812 |
| 208791_at             | CLU     | clusterin                                                      | 1191   | -1.6535  | 0.006231 | 0.053824 |
| 209383_at             | DDIT3   | DNA-damage-inducible transcript 3                              | 1649   | -1.19919 | 0.00626  | 0.053842 |
| 217022_s_at           | IGH     | immunoglobulin heavy locus                                     | 3492   | -1.26043 | 0.006498 | 0.054967 |
|                       |         | Dab, mitogen-responsive phosphoprotein, homolog 2 (Drosophila) |        |          |          |          |
| 201280_s_at           | DAB2    |                                                                | 1601   | -1.35685 | 0.006817 | 0.056659 |
| AFFX-DapX-M_at        | ---     | ---                                                            |        | -1.10207 | 0.007018 | 0.057621 |
| 211074_at             | FOLR1   | folate receptor 1 (adult)                                      | 2348   | -2.335   | 0.007106 | 0.057921 |
| 221556_at             | CDC14B  | cell division cycle 14B                                        | 8555   | -1.35463 | 0.007226 | 0.058222 |
| 212723_at             | JMJD6   | jumonji domain containing 6                                    | 23210  | -1.10344 | 0.007325 | 0.058511 |
| 211745_x_at           | HBA1    | hemoglobin, alpha 1                                            | 3039   | -2.39195 | 0.007372 | 0.058683 |
| 204141_at             | TUBB2A  | tubulin, beta 2A class IIa                                     | 7280   | -2.1393  | 0.007748 | 0.060237 |
| 208579_x_at           | H2BFS   | H2B histone family, member S (pseudogene)                      | 54145  | -1.4314  | 0.008655 | 0.063919 |
| 203973_s_at           | CEBPD   | CCAAT/enhancer binding protein (C/EBP), delta                  | 1052   | -1.24524 | 0.008766 | 0.064315 |
| 201170_s_at           | BHLHE40 | basic helix-loop-helix family, member e40                      | 8553   | -1.48301 | 0.008896 | 0.064843 |
| 205119_s_at           | FPR1    | formyl peptide receptor 1                                      | 2357   | -1.27582 | 0.009081 | 0.065557 |
| 204961_s_at           | NCF1    | neutrophil cytosolic factor 1                                  | 653361 | -1.3618  | 0.009093 | 0.06559  |
| 201616_s_at           | CALD1   | caldesmon 1                                                    | 800    | -1.10576 | 0.009118 | 0.065687 |
| 204018_x_at           | HBA1    | hemoglobin, alpha 1                                            | 3039   | -1.98013 | 0.009214 | 0.066107 |
| 213539_at             | CD3D    | CD3d molecule, delta (CD3-TCR complex)                         | 915    | -1.04108 | 0.009761 | 0.067714 |
| 202388_at             | RGS2    | regulator of G-protein signaling 2, 24kDa                      | 5997   | -1.46404 | 0.009794 | 0.06779  |
| 201798_s_at           | MYOF    | myoferlin                                                      | 26509  | -1.51466 | 0.009894 | 0.068217 |
| 203708_at             | PDE4B   | phosphodiesterase 4B, cAMP-specific                            | 5142   | -1.38481 | 0.01     | 0.068731 |
| 214084_x_at           | NCF1C   | neutrophil cytosolic factor 1C pseudogene                      | 654817 | -1.39567 | 0.010409 | 0.070394 |
| 209458_x_at           | HBA1    | hemoglobin, alpha 1                                            | 3039   | -2.13257 | 0.010802 | 0.071832 |
| 217762_s_at           | RAB31   | RAB31, member RAS oncogene family                              | 11031  | -1.34439 | 0.010983 | 0.072433 |
| 208022_s_at           | CDC14B  | cell division cycle 14B                                        | 8555   | -1.06029 | 0.011035 | 0.072627 |

|                         |           |                                                                                    |           |          |          |          |
|-------------------------|-----------|------------------------------------------------------------------------------------|-----------|----------|----------|----------|
| 204790_at               | SMAD7     | SMAD family member 7                                                               | 4092      | -1.18892 | 0.011176 | 0.072876 |
| 217414_x_at             | HBA1      | hemoglobin, alpha 1                                                                | 3039      | -2.04967 | 0.011779 | 0.075213 |
| 204480_s_at             | C9orf16   | chromosome 9 open reading frame 16                                                 | 79095     | -1.0583  | 0.01178  | 0.075213 |
| 204908_s_at             | BCL3      | B-cell CLL/lymphoma 3                                                              | 602       | -1.12158 | 0.011802 | 0.075244 |
| 206883_x_at             | GP9       | glycoprotein IX (platelet)                                                         | 2815      | -1.39492 | 0.012283 | 0.076763 |
| 211964_at               | COL4A2    | collagen, type IV, alpha 2                                                         | 1284      | -1.30407 | 0.012296 | 0.076763 |
| AFFX-                   |           |                                                                                    |           |          |          |          |
| HUMGAPDH/M33197_5_at    | GAPDH     | glyceraldehyde-3-phosphate dehydrogenase                                           | 2597      | -1.07979 | 0.012327 | 0.076822 |
| 202887_s_at             | DDIT4     | DNA-damage-inducible transcript 4                                                  | 54541     | -1.42927 | 0.012333 | 0.076822 |
| AFFX-                   |           |                                                                                    |           |          |          |          |
| HUMGAPDH/M33197_M_at    | GAPDH     | glyceraldehyde-3-phosphate dehydrogenase                                           | 2597      | -1.25641 | 0.012335 | 0.076822 |
| 204588_s_at             | SLC7A7    | solute carrier family 7 (amino acid transporter light chain, y+L system), member 7 | 9056      | -1.19903 | 0.012402 | 0.077024 |
| 206655_s_at             | GP1BB     | glycoprotein Ib (platelet), beta polypeptide                                       | 2812      | -2.09441 | 0.0128   | 0.078521 |
| 221841_s_at             | KLF4      | Kruppel-like factor 4 (gut)                                                        | 9314      | -1.65198 | 0.012861 | 0.078835 |
| 212657_s_at             | IL1RN     | interleukin 1 receptor antagonist                                                  | 3557      | -1.14627 | 0.013221 | 0.080181 |
| 204620_s_at             | VCAN      | versican                                                                           | 1462      | -1.51568 | 0.013307 | 0.080358 |
| 205442_at               | MFAP3L    | microfibrillar-associated protein 3-like                                           | 9848      | -1.52051 | 0.013437 | 0.080854 |
| 200665_s_at             | SPARC     | secreted protein, acidic, cysteine-rich (osteonectin)                              | 6678      | -1.75861 | 0.01347  | 0.080865 |
| 204396_s_at             | GRK5      | G protein-coupled receptor kinase 5                                                | 2869      | -1.28375 | 0.013822 | 0.082085 |
| 202207_at               | ARL4C     | ADP-ribosylation factor-like 4C                                                    | 10123     | -1.06368 | 0.014043 | 0.082963 |
| AFFX-HSAC07/X00351_3_at | ACTB      | actin, beta                                                                        | 60        | -1.37822 | 0.014382 | 0.0839   |
| 214974_x_at             | CXCL5     | chemokine (C-X-C motif) ligand 5                                                   | 6374      | -1.55942 | 0.014408 | 0.083963 |
| 213275_x_at             | CTSB      | cathepsin B                                                                        | 1508      | -1.09109 | 0.014496 | 0.084285 |
| 214677_x_at             | CYAT1     | immunoglobulin lambda light chain-like                                             | 100290481 | -1.19702 | 0.014517 | 0.084316 |
| 218559_s_at             | MAFB      | v-maf musculoaponeurotic fibrosarcoma oncogene homolog B (avian)                   | 9935      | -1.60023 | 0.014906 | 0.085665 |
| 208527_x_at             | HIST1H2BE | histone cluster 1, H2be                                                            | 8344      | -1.0534  | 0.015738 | 0.08838  |
| 202310_s_at             | COL1A1    | collagen, type I, alpha 1                                                          | 1277      | -1.87619 | 0.016831 | 0.091891 |
| 208601_s_at             | TUBB1     | tubulin, beta 1 class VI                                                           | 81027     | -1.17222 | 0.017934 | 0.095324 |
| 219403_s_at             | HPSE      | heparanase                                                                         | 10855     | -1.31934 | 0.018497 | 0.096806 |
| 200622_x_at             | CALM3     | calmodulin 3 (phosphorylase kinase, delta)                                         | 808       | -1.04785 | 0.018549 | 0.096942 |
| 212667_at               | SPARC     | secreted protein, acidic, cysteine-rich (osteonectin)                              | 6678      | -1.34731 | 0.018812 | 0.097654 |
| 209949_at               | NCF2      | neutrophil cytosolic factor 2                                                      | 4688      | -1.34905 | 0.01953  | 0.099726 |
| 204122_at               | TYROBP    | TYRO protein tyrosine kinase binding protein                                       | 7305      | -1.58727 | 0.019681 | 0.100052 |

|                                |            |                                                                                                   |        |          |          |          |
|--------------------------------|------------|---------------------------------------------------------------------------------------------------|--------|----------|----------|----------|
| 201811_x_at                    | SH3BP5     | SH3-domain binding protein 5 (BTK-associated)                                                     | 9467   | -1.02097 | 0.020101 | 0.101165 |
| 214469_at                      | HIST1H2AE  | histone cluster 1, H2ae                                                                           | 3012   | -1.04742 | 0.020232 | 0.101492 |
| 200999_s_at                    | CKAP4      | cytoskeleton-associated protein 4                                                                 | 10970  | -1.1494  | 0.020405 | 0.101743 |
| 204319_s_at                    | RGS10      | regulator of G-protein signaling 10                                                               | 6001   | -1.05791 | 0.020642 | 0.102328 |
| 37966_at                       | PARVB      | parvin, beta                                                                                      | 29780  | -1.18316 | 0.020871 | 0.102995 |
| AFFX-<br>HUMISGF3A/M97935_3_at | STAT1      | signal transducer and activator of transcription 1, 91kDa                                         | 6772   | -1.13562 | 0.022192 | 0.106109 |
| 208546_x_at                    | HIST1H2BH  | histone cluster 1, H2bh                                                                           | 8345   | -1.03067 | 0.022452 | 0.106776 |
| 204834_at                      | FGL2       | fibrinogen-like 2                                                                                 | 10875  | -1.4682  | 0.022775 | 0.107256 |
| 216442_x_at                    | FN1        | fibronectin 1                                                                                     | 2335   | -1.90726 | 0.023141 | 0.108166 |
| 204103_at                      | CCL4       | chemokine (C-C motif) ligand 4                                                                    | 6351   | -1.0683  | 0.02465  | 0.111906 |
| 221269_s_at                    | SH3BGRL3   | SH3 domain binding glutamic acid-rich protein like 3                                              | 83442  | -1.17357 | 0.024677 | 0.111906 |
| 201842_s_at                    | EFEMP1     | EGF containing fibulin-like extracellular matrix protein 1                                        | 2202   | -1.50062 | 0.024795 | 0.112138 |
| 208450_at                      | LGALS2     | lectin, galactoside-binding, soluble, 2                                                           | 3957   | -1.55709 | 0.025744 | 0.114214 |
| 212464_s_at                    | FN1        | fibronectin 1                                                                                     | 2335   | -1.96353 | 0.025831 | 0.114387 |
| 204971_at                      | CSTA       | cystatin A (stefin A)                                                                             | 1475   | -1.4559  | 0.026275 | 0.115382 |
| 211719_x_at                    | FN1        | fibronectin 1                                                                                     | 2335   | -2.20582 | 0.026796 | 0.116477 |
| 210495_x_at                    | FN1        | fibronectin 1                                                                                     | 2335   | -1.90768 | 0.026965 | 0.116845 |
| 216248_s_at                    | NR4A2      | nuclear receptor subfamily 4, group A, member 2                                                   | 4929   | -1.17499 | 0.028238 | 0.119726 |
| 204912_at                      | IL10RA     | interleukin 10 receptor, alpha                                                                    | 3587   | -1.05258 | 0.02903  | 0.121428 |
| 211699_x_at                    | HBA1       | hemoglobin, alpha 1                                                                               | 3039   | -1.60002 | 0.029162 | 0.121623 |
| AFFX-HSAC07/X00351_5_at        | ACTB       | actin, beta                                                                                       | 60     | -1.04373 | 0.029941 | 0.123368 |
| 218280_x_at                    | HIST2H2AA4 | histone cluster 2, H2aa4                                                                          | 723790 | -1.035   | 0.029948 | 0.123368 |
| 215240_at                      | ITGB3      | integrin, beta 3 (platelet glycoprotein IIIa, antigen CD61)                                       | 3690   | -1.18589 | 0.030708 | 0.124841 |
| 219630_at                      | PDZK1IP1   | PDZK1 interacting protein 1                                                                       | 10158  | -1.16143 | 0.031505 | 0.126922 |
| 56256_at                       | SIDT2      | SID1 transmembrane family, member 2<br>pro-platelet basic protein (chemokine (C-X-C motif) ligand | 51092  | -1.06356 | 0.03192  | 0.127917 |
| 214146_s_at                    | PPBP       | 7)                                                                                                | 5473   | -2.2804  | 0.032189 | 0.128506 |
| 217683_at                      | HBE1       | hemoglobin, epsilon 1                                                                             | 3046   | -1.01632 | 0.03275  | 0.12959  |
| 202627_s_at                    | SERPINE1   | serpin peptidase inhibitor, clade E (nexin, plasminogen<br>activator inhibitor type 1), member 1  | 5054   | -1.24155 | 0.035257 | 0.134957 |
| 218223_s_at                    | PLEKHO1    | 1<br>pleckstrin homology domain containing, family O member                                       | 51177  | -1.02949 | 0.035417 | 0.13521  |
| 203394_s_at                    | HES1       | hairy and enhancer of split 1, (Drosophila)                                                       | 3280   | -1.19137 | 0.036252 | 0.137146 |
| 214511_x_at                    | FCGR1B     | Fc fragment of IgG, high affinity Ib, receptor (CD64)                                             | 2210   | -1.00332 | 0.036916 | 0.1385   |

|             |            |                                                                                               |        |          |          |          |
|-------------|------------|-----------------------------------------------------------------------------------------------|--------|----------|----------|----------|
| 211980_at   | COL4A1     | collagen, type IV, alpha 1                                                                    | 1282   | -1.2568  | 0.037235 | 0.139094 |
| 215076_s_at | COL3A1     | collagen, type III, alpha 1                                                                   | 1281   | -1.43307 | 0.038584 | 0.141774 |
| 218723_s_at | RGCC       | regulator of cell cycle                                                                       | 28984  | -1.35285 | 0.038884 | 0.142295 |
| 201465_s_at | JUN        | jun proto-oncogene                                                                            | 3725   | -1.23554 | 0.039397 | 0.143388 |
| 206493_at   | ITGA2B     | integrin, alpha 2b (platelet glycoprotein IIb of IIb/IIIa complex, antigen CD41)              | 3674   | -1.40259 | 0.040966 | 0.146453 |
| 209651_at   | TGFB111    | transforming growth factor beta 1 induced transcript 1                                        | 7041   | -1.18925 | 0.043241 | 0.150602 |
| 202403_s_at | COL1A2     | collagen, type I, alpha 2                                                                     | 1278   | -1.44055 | 0.046503 | 0.156448 |
| 213975_s_at | LYZ        | lysozyme                                                                                      | 4069   | -1.35445 | 0.046533 | 0.156457 |
| 202391_at   | BASP1      | brain abundant, membrane attached signal protein 1                                            | 10409  | -1.21789 | 0.050925 | 0.164058 |
| 200897_s_at | PALLD      | palladin, cytoskeletal associated protein                                                     | 23022  | -1.19733 | 0.054484 | 0.169794 |
| 207206_s_at | ALOX12     | arachidonate 12-lipoxygenase                                                                  | 239    | -1.13633 | 0.054626 | 0.170045 |
| 202404_s_at | COL1A2     | collagen, type I, alpha 2                                                                     | 1278   | -1.71166 | 0.056539 | 0.173313 |
| 210809_s_at | POSTN      | periostin, osteoblast specific factor                                                         | 10631  | -1.70047 | 0.059219 | 0.177986 |
| 217572_at   | ---        | ---                                                                                           |        | -1.0617  | 0.061496 | 0.181515 |
| 204351_at   | S100P      | S100 calcium binding protein P                                                                | 6286   | -1.10416 | 0.061934 | 0.182039 |
| 202953_at   | C1QB       | complement component 1, q subcomponent, B chain                                               | 713    | -1.04337 | 0.061996 | 0.182121 |
| 36711_at    | MAFF       | v-maf musculoaponeurotic fibrosarcoma oncogene homolog F (avian)                              | 23764  | -2.07111 | 0.062874 | 0.183657 |
| 214290_s_at | HIST2H2AA4 | histone cluster 2, H2aa4                                                                      | 723790 | -1.00017 | 0.063196 | 0.184141 |
| 220496_at   | CLEC1B     | C-type lectin domain family 1, member B                                                       | 51266  | -1.26133 | 0.068125 | 0.192398 |
| 202628_s_at | SERPINE1   | serpin peptidase inhibitor, clade E (nexin, plasminogen activator inhibitor type 1), member 1 | 5054   | -1.0038  | 0.068895 | 0.193543 |
| 201852_x_at | COL3A1     | collagen, type III, alpha 1                                                                   | 1281   | -1.06074 | 0.069846 | 0.19499  |
| 209210_s_at | FERMT2     | fermitin family member 2                                                                      | 10979  | -1.18848 | 0.071118 | 0.197    |
| 208937_s_at | ID1        | inhibitor of DNA binding 1, dominant negative helix-loop-helix protein                        | 3397   | -1.06464 | 0.076912 | 0.204982 |
| 202644_s_at | TNFAIP3    | tumor necrosis factor, alpha-induced protein 3                                                | 7128   | -1.11193 | 0.077731 | 0.206126 |
| 202555_s_at | MYLK       | myosin light chain kinase                                                                     | 4638   | -1.20646 | 0.078352 | 0.206861 |
| 207808_s_at | PROS1      | protein S (alpha)                                                                             | 5627   | -1.05757 | 0.080762 | 0.210082 |
| 202237_at   | NNMT       | nicotinamide N-methyltransferase                                                              | 4837   | -1.16906 | 0.084988 | 0.216541 |
| 204959_at   | MNDA       | myeloid cell nuclear differentiation antigen                                                  | 4332   | -1.11553 | 0.099265 | 0.237052 |
| 206390_x_at | PF4        | platelet factor 4                                                                             | 5196   | -1.56272 | 0.105914 | 0.246063 |
| 207076_s_at | ASS1       | argininosuccinate synthase 1                                                                  | 445    | -1.01934 | 0.110808 | 0.252682 |
| 206494_s_at | ITGA2B     | integrin, alpha 2b (platelet glycoprotein IIb of IIb/IIIa                                     | 3674   | -1.21162 | 0.118492 | 0.262217 |

|             |          |                                                                                                                             |           |          |          |          |
|-------------|----------|-----------------------------------------------------------------------------------------------------------------------------|-----------|----------|----------|----------|
|             |          | complex, antigen CD41)                                                                                                      |           |          |          |          |
| 207140_at   | ALPI     | alkaline phosphatase, intestinal                                                                                            | 248       | -1.14253 | 0.12301  | 0.267727 |
| 216834_at   | RGS1     | regulator of G-protein signaling 1                                                                                          | 5996      | -1.34806 | 0.15206  | 0.303847 |
| 202988_s_at | RGS1     | regulator of G-protein signaling 1                                                                                          | 5996      | -1.08916 | 0.188906 | 0.346892 |
| 213515_x_at | HBG1     | hemoglobin, gamma A                                                                                                         | 3047      | -1.06377 | 0.246664 | 0.407885 |
| 212671_s_at | HLA-DQA1 | major histocompatibility complex, class II, DQ alpha 1 Fc fragment of IgE, high affinity I, receptor for; alpha polypeptide | 3117      | 1.097239 | 0.126891 | 0.272796 |
| 211734_s_at | FCER1A   | major histocompatibility complex, class II, DR alpha                                                                        | 2205      | 1.009251 | 0.078698 | 0.207233 |
| 210982_s_at | HLA-DRA  | mesoderm specific transcript                                                                                                | 3122      | 1.194665 | 0.07091  | 0.196595 |
| 202016_at   | MEST     | ribonucleotide reductase M2                                                                                                 | 4232      | 1.10616  | 0.05007  | 0.162642 |
| 209773_s_at | RRM2     | BTB (POZ) domain containing 3                                                                                               | 6241      | 1.272153 | 0.049561 | 0.161602 |
| 202946_s_at | BTBD3    | major histocompatibility complex, class II, DR alpha                                                                        | 22903     | 1.045621 | 0.04313  | 0.150497 |
| 208894_at   | HLA-DRA  | zinc finger and BTB domain containing 1                                                                                     | 3122      | 1.34853  | 0.028179 | 0.119545 |
| 213376_at   | ZBTB1    | serine peptidase inhibitor, Kazal type 2 (acrosin-trypsin inhibitor)                                                        | 22890     | 1.088786 | 0.026552 | 0.116003 |
| 206310_at   | SPINK2   | guanylate cyclase 1, soluble, beta 3                                                                                        | 6691      | 1.055612 | 0.024944 | 0.112515 |
| 203817_at   | GUCY1B3  | ectonucleotide pyrophosphatase/phosphodiesterase 2                                                                          | 2983      | 1.163996 | 0.024688 | 0.111906 |
| 209392_at   | ENPP2    | protein disulfide isomerase family A, member 6                                                                              | 5168      | 1.030545 | 0.023369 | 0.108718 |
| 216640_s_at | PDIA6    | protein tyrosine phosphatase, receptor type, C                                                                              | 10130     | 1.19128  | 0.020388 | 0.10174  |
| 212588_at   | PTPRC    | leptin receptor                                                                                                             | 5788      | 1.226601 | 0.019819 | 0.100488 |
| 209894_at   | LEPR     | nucleolar and spindle associated protein 1                                                                                  | 3953      | 1.184929 | 0.018148 | 0.09595  |
| 218039_at   | NUSAP1   | glycine cleavage system protein H pseudogene 5                                                                              | 51203     | 1.157405 | 0.017634 | 0.094469 |
| 213129_s_at | GCSHP5   | zinc finger protein 131                                                                                                     | 100329108 | 1.10714  | 0.01585  | 0.088615 |
| 201577_at   | NME1     | NME/NM23 nucleoside diphosphate kinase 1                                                                                    | 4830      | 1.034901 | 0.015518 | 0.087753 |
| 214741_at   | ZNF131   | ---                                                                                                                         | 7690      | 1.072298 | 0.015265 | 0.086843 |
| 212498_at   | ---      | ---                                                                                                                         |           | 1.007129 | 0.014477 | 0.084233 |
| 200953_s_at | CCND2    | cyclin D2                                                                                                                   | 894       | 1.083456 | 0.014299 | 0.083701 |
| 207668_x_at | PDIA6    | protein disulfide isomerase family A, member 6                                                                              | 10130     | 1.075588 | 0.014187 | 0.083288 |
| 208639_x_at | PDIA6    | protein disulfide isomerase family A, member 6 ring finger and CHY zinc finger domain containing 1, E3                      | 10130     | 1.148925 | 0.013925 | 0.082576 |
| 212749_s_at | RCHY1    | ubiquitin protein ligase                                                                                                    | 25898     | 1.154346 | 0.013753 | 0.081884 |
| 213599_at   | OIP5     | Opa interacting protein 5                                                                                                   | 11339     | 1.034915 | 0.013279 | 0.080287 |
| 218477_at   | TMEM14A  | transmembrane protein 14A                                                                                                   | 28978     | 1.038055 | 0.01243  | 0.077084 |
| 209160_at   | AKR1C3   | aldo-keto reductase family 1, member C3                                                                                     | 8644      | 1.050868 | 0.012306 | 0.076764 |

|             |          |                                                                                                                     |       |          |          |          |
|-------------|----------|---------------------------------------------------------------------------------------------------------------------|-------|----------|----------|----------|
| 207165_at   | HMMR     | hyaluronan-mediated motility receptor (RHAMM)                                                                       | 3161  | 1.12524  | 0.012278 | 0.076763 |
| 200750_s_at | RAN      | RAN, member RAS oncogene family                                                                                     | 5901  | 1.196145 | 0.012173 | 0.076447 |
| 200853_at   | H2AFZ    | H2A histone family, member Z                                                                                        | 3015  | 1.133212 | 0.012107 | 0.076162 |
| 211762_s_at | KPNA2    | karyopherin alpha 2 (RAG cohort 1, importin alpha 1)                                                                | 3838  | 1.122517 | 0.011697 | 0.074903 |
| 202591_s_at | SSBP1    | single-stranded DNA binding protein 1, mitochondrial                                                                | 6742  | 1.079587 | 0.011546 | 0.074317 |
| 212224_at   | ALDH1A1  | aldehyde dehydrogenase 1 family, member A1                                                                          | 216   | 1.532805 | 0.011256 | 0.073081 |
| 202157_s_at | CELF2    | CUGBP, Elav-like family member 2                                                                                    | 10659 | 1.345852 | 0.011153 | 0.072851 |
| 201018_at   | EIF1AX   | eukaryotic translation initiation factor 1A, X-linked<br>heat shock protein 90kDa alpha (cytosolic), class B member | 1964  | 1.07069  | 0.011072 | 0.072653 |
| 214359_s_at | HSP90AB1 | 1                                                                                                                   | 3326  | 1.611725 | 0.010493 | 0.070756 |
| 202266_at   | TDP2     | tyrosyl-DNA phosphodiesterase 2                                                                                     | 51567 | 1.168396 | 0.009941 | 0.068453 |
| 204023_at   | RFC4     | replication factor C (activator 1) 4, 37kDa                                                                         | 5984  | 1.161476 | 0.009896 | 0.068217 |
| 208852_s_at | CANX     | calnexin                                                                                                            | 821   | 1.147782 | 0.009836 | 0.067995 |
| 208990_s_at | HNRNPH3  | heterogeneous nuclear ribonucleoprotein H3 (2H9)                                                                    | 3189  | 1.022691 | 0.009773 | 0.067735 |
| 201193_at   | IDH1     | isocitrate dehydrogenase 1 (NADP+), soluble                                                                         | 3417  | 1.109705 | 0.009675 | 0.067345 |
| 204444_at   | KIF11    | kinesin family member 11                                                                                            | 3832  | 1.052307 | 0.009568 | 0.06712  |
| 202899_s_at | SRSF3    | serine/arginine-rich splicing factor 3                                                                              | 6428  | 1.121111 | 0.009554 | 0.067103 |
| 206834_at   | HBD      | hemoglobin, delta                                                                                                   | 3045  | 1.603183 | 0.009504 | 0.066927 |
| 213241_at   | PLXNC1   | plexin C1                                                                                                           | 10154 | 1.098497 | 0.009355 | 0.066441 |
| 208783_s_at | CD46     | CD46 molecule, complement regulatory protein                                                                        | 4179  | 1.009037 | 0.009253 | 0.066184 |
| 204905_s_at | EEF1E1   | eukaryotic translation elongation factor 1 epsilon 1                                                                | 9521  | 1.018486 | 0.009203 | 0.06606  |
| 203755_at   | BUB1B    | BUB1 mitotic checkpoint serine/threonine kinase B                                                                   | 701   | 1.106693 | 0.009061 | 0.065504 |
| 201462_at   | SCRN1    | secernin 1                                                                                                          | 9805  | 1.089176 | 0.008825 | 0.064512 |
| 207238_s_at | PTPRC    | protein tyrosine phosphatase, receptor type, C                                                                      | 5788  | 1.002292 | 0.00794  | 0.060948 |
| 202469_s_at | CPSF6    | cleavage and polyadenylation specific factor 6, 68kDa                                                               | 11052 | 1.017757 | 0.007655 | 0.05992  |
| 218350_s_at | GMNN     | geminin, DNA replication inhibitor                                                                                  | 51053 | 1.289682 | 0.007592 | 0.059577 |
| 201653_at   | CNIH     | cornichon homolog (Drosophila)                                                                                      | 10175 | 1.024747 | 0.007566 | 0.059412 |
| 210759_s_at | PSMA1    | proteasome (prosome, macropain) subunit, alpha type, 1                                                              | 5682  | 1.025107 | 0.007534 | 0.05925  |
| 218984_at   | PUS7     | pseudouridylate synthase 7 homolog (S. cerevisiae)                                                                  | 54517 | 1.092719 | 0.007372 | 0.058683 |
| 213541_s_at | ERG      | v-ets erythroblastosis virus E26 oncogene homolog (avian)<br>complement component 1, q subcomponent binding         | 2078  | 1.268671 | 0.007213 | 0.058222 |
| 214214_s_at | C1QBP    | protein                                                                                                             | 708   | 1.081512 | 0.006939 | 0.057298 |
| 218883_s_at | MLF1IP   | MLF1 interacting protein                                                                                            | 79682 | 1.002951 | 0.006546 | 0.05522  |
| 204798_at   | MYB      | v-myb myeloblastosis viral oncogene homolog (avian)                                                                 | 4602  | 1.33907  | 0.006372 | 0.054414 |



|             |           |                                                                                                                                                    |        |          |          |          |
|-------------|-----------|----------------------------------------------------------------------------------------------------------------------------------------------------|--------|----------|----------|----------|
| 214710_s_at | CCNB1     | cyclin B1                                                                                                                                          | 891    | 1.30622  | 0.006365 | 0.05438  |
| 200892_s_at | TRA2B     | transformer 2 beta homolog (Drosophila)                                                                                                            | 6434   | 1.059953 | 0.006225 | 0.053824 |
| 201084_s_at | BCLAF1    | BCL2-associated transcription factor 1                                                                                                             | 9774   | 1.042614 | 0.006038 | 0.053075 |
| 219306_at   | KIF15     | kinesin family member 15                                                                                                                           | 56992  | 1.005174 | 0.005933 | 0.052485 |
| 209180_at   | RABGGTB   | Rab geranylgeranyltransferase, beta subunit                                                                                                        | 5876   | 1.030791 | 0.00587  | 0.05217  |
| 201829_at   | NET1      | neuroepithelial cell transforming 1                                                                                                                | 10276  | 1.16411  | 0.005759 | 0.051649 |
| 213047_x_at | SET       | SET nuclear oncogene                                                                                                                               | 6418   | 1.072575 | 0.005512 | 0.05039  |
| 201241_at   | DDX1      | DEAD (Asp-Glu-Ala-Asp) box helicase 1                                                                                                              | 1653   | 1.20415  | 0.005509 | 0.05039  |
| 209728_at   | HLA-DRB4  | major histocompatibility complex, class II, DR beta 4                                                                                              | 3126   | 2.396871 | 0.005479 | 0.050353 |
| 201890_at   | RRM2      | ribonucleotide reductase M2                                                                                                                        | 6241   | 1.743456 | 0.005295 | 0.049397 |
| 201477_s_at | RRM1      | ribonucleotide reductase M1                                                                                                                        | 6240   | 1.259059 | 0.005293 | 0.049397 |
| 200728_at   | ACTR2     | ARP2 actin-related protein 2 homolog (yeast)                                                                                                       | 10097  | 1.079756 | 0.005255 | 0.049248 |
| 212250_at   | MTDH      | metadherin                                                                                                                                         | 92140  | 1.112188 | 0.005254 | 0.049248 |
| 200996_at   | ACTR3     | ARP3 actin-related protein 3 homolog (yeast)                                                                                                       | 10096  | 1.167525 | 0.005078 | 0.048328 |
| 203405_at   | PSMG1     | proteasome (prosome, macropain) assembly chaperone 1                                                                                               | 8624   | 1.002781 | 0.005039 | 0.048111 |
| 200877_at   | CCT4      | chaperonin containing TCP1, subunit 4 (delta)                                                                                                      | 10575  | 1.134112 | 0.004843 | 0.047046 |
| 210438_x_at | TROVE2    | TROVE domain family, member 2                                                                                                                      | 6738   | 1.075252 | 0.004643 | 0.046201 |
| 201417_at   | SOX4      | SRY (sex determining region Y)-box 4<br>phosphoribosylaminoimidazole carboxylase,<br>phosphoribosylaminoimidazole succinocarboxamide<br>synthetase | 6659   | 1.240673 | 0.004546 | 0.045582 |
| 201014_s_at | PAICS     | heat shock protein 90kDa alpha (cytosolic), class B member                                                                                         | 10606  | 1.325476 | 0.004523 | 0.045413 |
| 200064_at   | HSP90AB1  | 1                                                                                                                                                  | 3326   | 1.128671 | 0.004413 | 0.044877 |
| 202268_s_at | NAE1      | NEDD8 activating enzyme E1 subunit 1                                                                                                               | 8883   | 1.117633 | 0.004311 | 0.044378 |
| 211137_s_at | ATP2C1    | ATPase, Ca <sup>++</sup> transporting, type 2C, member 1                                                                                           | 27032  | 1.024207 | 0.004133 | 0.04339  |
| 218694_at   | ARMCX1    | armadillo repeat containing, X-linked 1                                                                                                            | 51309  | 1.240431 | 0.004091 | 0.043202 |
| 201676_x_at | PSMA1     | proteasome (prosome, macropain) subunit, alpha type, 1                                                                                             | 5682   | 1.034639 | 0.00406  | 0.043079 |
| 217987_at   | ASNSD1    | asparagine synthetase domain containing 1                                                                                                          | 54529  | 1.242982 | 0.004059 | 0.043079 |
| 219563_at   | LINC00341 | long intergenic non-protein coding RNA 341<br>signal peptidase complex subunit 2 homolog ( <i>S. cerevisiae</i> )                                  | 79686  | 1.115324 | 0.004051 | 0.043037 |
| 201240_s_at | LOC653566 | pseudogene                                                                                                                                         | 653566 | 1.053758 | 0.004022 | 0.042778 |
| 204146_at   | RAD51AP1  | RAD51 associated protein 1<br>v-myc myelocytomatosis viral related oncogene,                                                                       | 10635  | 1.156331 | 0.004016 | 0.042729 |
| 209757_s_at | MYCN      | neuroblastoma derived (avian)                                                                                                                      | 4613   | 1.210293 | 0.003996 | 0.042614 |
| 209095_at   | DLD       | dihydrolipoamide dehydrogenase                                                                                                                     | 1738   | 1.319642 | 0.003935 | 0.042191 |

|             |          |                                                                                         |        |          |          |          |
|-------------|----------|-----------------------------------------------------------------------------------------|--------|----------|----------|----------|
| 211971_s_at | LRPPRC   | leucine-rich pentatricopeptide repeat containing                                        | 10128  | 1.113512 | 0.003889 | 0.041998 |
| 211746_x_at | PSMA1    | proteasome (prosome, macropain) subunit, alpha type, 1                                  | 5682   | 1.018568 | 0.003854 | 0.041914 |
| 200052_s_at | ILF2     | interleukin enhancer binding factor 2                                                   | 3608   | 1.0667   | 0.003851 | 0.041914 |
| 212640_at   | PTPLB    | protein tyrosine phosphatase-like (proline instead of catalytic arginine), member b     | 201562 | 1.131425 | 0.003826 | 0.041838 |
| 200774_at   | FAM120A  | family with sequence similarity 120A                                                    | 23196  | 1.114974 | 0.003738 | 0.04145  |
| 209318_x_at | PLAGL1   | pleiomorphic adenoma gene-like 1                                                        | 5325   | 1.23893  | 0.003682 | 0.04125  |
| 201180_s_at | GNAI3    | guanine nucleotide binding protein (G protein), alpha inhibiting activity polypeptide 3 | 2773   | 1.037392 | 0.003621 | 0.040838 |
| 215933_s_at | HHEX     | hematopoietically expressed homeobox                                                    | 3087   | 1.279779 | 0.003597 | 0.040702 |
| 200807_s_at | HSPD1    | heat shock 60kDa protein 1 (chaperonin)                                                 | 3329   | 1.015247 | 0.00358  | 0.040641 |
| 202539_s_at | HMGCR    | 3-hydroxy-3-methylglutaryl-CoA reductase                                                | 3156   | 1.103166 | 0.003517 | 0.040158 |
| 200072_s_at | HNRNPM   | heterogeneous nuclear ribonucleoprotein M                                               | 4670   | 1.402849 | 0.00349  | 0.040028 |
| 204373_s_at | CEP350   | centrosomal protein 350kDa                                                              | 9857   | 1.185706 | 0.003481 | 0.040028 |
| 203209_at   | RFC5     | replication factor C (activator 1) 5, 36.5kDa                                           | 5985   | 1.113492 | 0.00338  | 0.039333 |
| 211935_at   | ARL6IP1  | ADP-ribosylation factor-like 6 interacting protein 1                                    | 23204  | 1.159268 | 0.003341 | 0.039    |
| 203566_s_at | AGL      | amylo-alpha-1, 6-glucosidase, 4-alpha-glucanotransferase                                | 178    | 1.046125 | 0.003305 | 0.038871 |
| 201549_x_at | KDM5B    | lysine (K)-specific demethylase 5B                                                      | 10765  | 1.065448 | 0.003285 | 0.038786 |
| 208029_s_at | LAPTM4B  | lysosomal protein transmembrane 4 beta                                                  | 55353  | 1.253963 | 0.003231 | 0.038501 |
| 218585_s_at | DTL      | denticleless E3 ubiquitin protein ligase homolog (Drosophila)                           | 51514  | 1.350603 | 0.003194 | 0.03822  |
| 212893_at   | ZZZ3     | zinc finger, ZZ-type containing 3                                                       | 26009  | 1.08034  | 0.003179 | 0.038151 |
| 215440_s_at | BEX4     | brain expressed, X-linked 4                                                             | 56271  | 1.274266 | 0.00308  | 0.037537 |
| 200020_at   | TARDBP   | TAR DNA binding protein                                                                 | 23435  | 1.100346 | 0.002966 | 0.036705 |
| 213293_s_at | TRIM22   | tripartite motif containing 22                                                          | 10346  | 1.403817 | 0.00295  | 0.036579 |
| 205612_at   | MMRN1    | multimerin 1                                                                            | 22915  | 1.21464  | 0.002937 | 0.036484 |
| 201930_at   | MCM6     | minichromosome maintenance complex component 6                                          | 4175   | 1.051838 | 0.002935 | 0.036484 |
| 208910_s_at | C1QBP    | complement component 1, q subcomponent binding protein                                  | 708    | 1.40182  | 0.00291  | 0.036295 |
| 218870_at   | ARHGAP15 | Rho GTPase activating protein 15                                                        | 55843  | 1.442188 | 0.002874 | 0.036047 |
| 204236_at   | FLI1     | Friend leukemia virus integration 1                                                     | 2313   | 1.290793 | 0.002863 | 0.036016 |
| 211784_s_at | SRSF1    | serine/arginine-rich splicing factor 1                                                  | 6426   | 1.027483 | 0.002853 | 0.035922 |
| 212215_at   | PREPL    | prolyl endopeptidase-like                                                               | 9581   | 1.016567 | 0.002832 | 0.03582  |
| 201713_s_at | RANBP2   | RAN binding protein 2                                                                   | 5903   | 1.15906  | 0.002829 | 0.035812 |
| 201589_at   | SMC1A    | structural maintenance of chromosomes 1A                                                | 8243   | 1.429532 | 0.002826 | 0.035794 |

|             |          |                                                                                                                          |       |          |          |          |
|-------------|----------|--------------------------------------------------------------------------------------------------------------------------|-------|----------|----------|----------|
| 201327_s_at | CCT6A    | chaperonin containing TCP1, subunit 6A (zeta 1)                                                                          | 908   | 1.110939 | 0.002792 | 0.035561 |
| 214949_at   | ---      | ---                                                                                                                      |       | 1.096897 | 0.002708 | 0.034908 |
| 213222_at   | PLCB1    | phospholipase C, beta 1 (phosphoinositide-specific)<br>v-kit Hardy-Zuckerman 4 feline sarcoma viral oncogene<br>homolog  | 23236 | 1.045277 | 0.002634 | 0.03437  |
| 205051_s_at | KIT      | homolog                                                                                                                  | 3815  | 1.349599 | 0.002631 | 0.034353 |
| 201652_at   | COPS5    | COP9 constitutive photomorphogenic homolog subunit 5<br>(Arabidopsis)                                                    | 10987 | 1.133169 | 0.002622 | 0.034334 |
| 208767_s_at | LAPTM4B  | lysosomal protein transmembrane 4 beta                                                                                   | 55353 | 1.125608 | 0.002597 | 0.034178 |
| 204026_s_at | ZWINT    | ZW10 interactor, kinetochore protein                                                                                     | 11130 | 1.36409  | 0.002574 | 0.033989 |
| 211615_s_at | LRPPRC   | leucine-rich pentatricopeptide repeat containing                                                                         | 10128 | 1.077666 | 0.002524 | 0.03353  |
| 206332_s_at | IFI16    | interferon, gamma-inducible protein 16                                                                                   | 3428  | 1.04713  | 0.002479 | 0.033114 |
| 213605_s_at | ---      | ---                                                                                                                      |       | 1.301604 | 0.002445 | 0.032816 |
| 219054_at   | NPR3     | natriuretic peptide receptor C/guanylate cyclase C<br>(atriuretic peptide receptor C)                                    | 4883  | 1.079574 | 0.002372 | 0.032376 |
| 212867_at   | NCOA2    | nuclear receptor coactivator 2                                                                                           | 10499 | 1.169646 | 0.002371 | 0.032376 |
| 208828_at   | POLE3    | polymerase (DNA directed), epsilon 3, accessory subunit                                                                  | 54107 | 1.189315 | 0.002289 | 0.031795 |
| 204127_at   | RFC3     | replication factor C (activator 1) 3, 38kDa                                                                              | 5983  | 1.217624 | 0.002267 | 0.031632 |
| 202599_s_at | NRIP1    | nuclear receptor interacting protein 1                                                                                   | 8204  | 1.485341 | 0.002258 | 0.03152  |
| 212557_at   | ZNF451   | zinc finger protein 451                                                                                                  | 26036 | 1.087217 | 0.002254 | 0.031489 |
| 210766_s_at | CSE1L    | CSE1 chromosome segregation 1-like (yeast)                                                                               | 1434  | 1.038634 | 0.002233 | 0.031297 |
| 211922_s_at | CAT      | catalase                                                                                                                 | 847   | 1.262699 | 0.002221 | 0.031297 |
| 205345_at   | BARD1    | BRCA1 associated RING domain 1                                                                                           | 580   | 1.097185 | 0.002218 | 0.031297 |
| 201197_at   | AMD1     | adenosylmethionine decarboxylase 1                                                                                       | 262   | 1.147451 | 0.002213 | 0.031264 |
| 204689_at   | HHEX     | hematopoietically expressed homeobox                                                                                     | 3087  | 1.069023 | 0.002165 | 0.030957 |
| 201624_at   | DARS     | aspartyl-tRNA synthetase                                                                                                 | 1615  | 1.026982 | 0.002159 | 0.030955 |
| 212766_s_at | ISG20L2  | interferon stimulated exonuclease gene 20kDa-like 2                                                                      | 81875 | 1.137911 | 0.002146 | 0.030863 |
| 201112_s_at | CSE1L    | CSE1 chromosome segregation 1-like (yeast)                                                                               | 1434  | 1.11844  | 0.002142 | 0.030838 |
| 212038_s_at | VDAC1    | voltage-dependent anion channel 1                                                                                        | 7416  | 1.422303 | 0.002135 | 0.030796 |
| 211953_s_at | IPO5     | importin 5                                                                                                               | 3843  | 1.242501 | 0.002132 | 0.030796 |
| 212612_at   | RCOR1    | REST corepressor 1                                                                                                       | 23186 | 1.102759 | 0.002126 | 0.030796 |
| 218715_at   | UTP6     | UTP6, small subunit (SSU) processome component,<br>homolog (yeast)                                                       | 55813 | 1.287375 | 0.002119 | 0.030758 |
| 217957_at   | C16orf80 | chromosome 16 open reading frame 80<br>suppression of tumorigenicity 13 (colon carcinoma) (Hsp70<br>interacting protein) | 29105 | 1.235392 | 0.002104 | 0.030707 |
| 208666_s_at | ST13     |                                                                                                                          | 6767  | 1.060002 | 0.00206  | 0.030421 |

|             |          |                                                                                                      |        |          |          |          |
|-------------|----------|------------------------------------------------------------------------------------------------------|--------|----------|----------|----------|
| 201054_at   | HNRNPA0  | heterogeneous nuclear ribonucleoprotein A0                                                           | 10949  | 1.042824 | 0.002053 | 0.030384 |
| 208863_s_at | SRSF1    | serine/arginine-rich splicing factor 1                                                               | 6426   | 1.155243 | 0.002024 | 0.03021  |
| 221942_s_at | GUCY1A3  | guanylate cyclase 1, soluble, alpha 3                                                                | 2982   | 1.274671 | 0.002022 | 0.030194 |
| 203380_x_at | SRSF5    | serine/arginine-rich splicing factor 5                                                               | 6430   | 1.094125 | 0.002013 | 0.030181 |
| 204439_at   | IFI44L   | interferon-induced protein 44-like                                                                   | 10964  | 1.917025 | 0.002005 | 0.030152 |
| 202119_s_at | CPNE3    | copine III                                                                                           | 8895   | 1.240924 | 0.001996 | 0.030069 |
| 202491_s_at | IKBKAP   | inhibitor of kappa light polypeptide gene enhancer in B-cells, kinase complex-associated protein     | 8518   | 1.162396 | 0.001995 | 0.030069 |
| 200816_s_at | PAFAH1B1 | platelet-activating factor acetylhydrolase 1b, regulatory subunit 1 (45kDa)                          | 5048   | 1.041005 | 0.001981 | 0.029948 |
| 203011_at   | IMPA1    | inositol(myo)-1(or 4)-monophosphatase 1                                                              | 3612   | 1.283329 | 0.001971 | 0.029877 |
| 202613_at   | CTPS1    | CTP synthase 1                                                                                       | 1503   | 1.114581 | 0.001955 | 0.0297   |
| 206937_at   | SPTA1    | spectrin, alpha, erythrocytic 1 (elliptocytosis 2)                                                   | 6708   | 1.151575 | 0.001936 | 0.029531 |
| 212037_at   | PNN      | pinin, desmosome associated protein                                                                  | 5411   | 1.494883 | 0.001917 | 0.029474 |
| 206052_s_at | SLBP     | stem-loop binding protein                                                                            | 7884   | 1.082828 | 0.001906 | 0.029434 |
| 201013_s_at | PAICS    | phosphoribosylaminoimidazole carboxylase, phosphoribosylaminoimidazole succinocarboxamide synthetase | 10606  | 1.121467 | 0.00186  | 0.029062 |
| 209642_at   | BUB1     | BUB1 mitotic checkpoint serine/threonine kinase                                                      | 699    | 1.034101 | 0.001808 | 0.028585 |
| 210425_x_at | GOLGA8B  | golgin A8 family, member B                                                                           | 440270 | 1.211965 | 0.001808 | 0.028585 |
| 209861_s_at | METAP2   | methionyl aminopeptidase 2                                                                           | 10988  | 1.173435 | 0.001784 | 0.0285   |
| 221547_at   | PRPF18   | PRP18 pre-mRNA processing factor 18 homolog (S. cerevisiae)                                          | 8559   | 1.010609 | 0.001784 | 0.0285   |
| 203138_at   | HAT1     | histone acetyltransferase 1                                                                          | 8520   | 1.697742 | 0.001772 | 0.028447 |
| 209630_s_at | FBXW2    | F-box and WD repeat domain containing 2                                                              | 26190  | 1.00777  | 0.001755 | 0.028286 |
| 201330_at   | RARS     | arginyl-tRNA synthetase                                                                              | 5917   | 1.048926 | 0.001753 | 0.028265 |
| 211727_s_at | COX11    | cytochrome c oxidase assembly homolog 11 (yeast)                                                     | 1353   | 1.104041 | 0.001747 | 0.028216 |
| 212287_at   | SUZ12    | suppressor of zeste 12 homolog (Drosophila)                                                          | 23512  | 1.060589 | 0.001742 | 0.028189 |
| 208802_at   | SRP72    | signal recognition particle 72kDa                                                                    | 6731   | 1.080033 | 0.001713 | 0.028028 |
| 200978_at   | MDH1     | malate dehydrogenase 1, NAD (soluble)                                                                | 4190   | 1.102564 | 0.001677 | 0.027682 |
| 203373_at   | SOCS2    | suppressor of cytokine signaling 2                                                                   | 8835   | 1.193044 | 0.001676 | 0.027682 |
| 218263_s_at | ZBED5    | zinc finger, BED-type containing 5                                                                   | 58486  | 1.068226 | 0.001674 | 0.027682 |
| 202303_x_at | SMARCA5  | SWI/SNF related, matrix associated, actin dependent regulator of chromatin, subfamily a, member 5    | 8467   | 1.013631 | 0.001653 | 0.02757  |
| 201472_at   | VBP1     | von Hippel-Lindau binding protein 1                                                                  | 7411   | 1.093136 | 0.001639 | 0.027452 |

|             |         |                                                                                                   |       |          |          |          |
|-------------|---------|---------------------------------------------------------------------------------------------------|-------|----------|----------|----------|
| 212825_at   | PAXIP1  | PAX interacting (with transcription-activation domain) protein 1                                  | 22976 | 1.152279 | 0.001534 | 0.026427 |
| 217993_s_at | MAT2B   | methionine adenosyltransferase II, beta                                                           | 27430 | 1.083589 | 0.001528 | 0.02639  |
| 202113_s_at | SNX2    | sorting nexin 2                                                                                   | 6643  | 1.270036 | 0.001506 | 0.02616  |
| 209330_s_at | HNRNPD  | heterogeneous nuclear ribonucleoprotein D (AU-rich element RNA binding protein 1, 37kDa)          | 3184  | 1.161084 | 0.001504 | 0.02616  |
| 206958_s_at | UPF3A   | UPF3 regulator of nonsense transcripts homolog A (yeast)                                          | 65110 | 1.374126 | 0.001456 | 0.025618 |
| 201478_s_at | DKC1    | dyskeratosis congenita 1, dyskerin                                                                | 1736  | 1.420645 | 0.00145  | 0.025591 |
| 210260_s_at | TNFAIP8 | tumor necrosis factor, alpha-induced protein 8                                                    | 25816 | 1.079476 | 0.001424 | 0.025305 |
| 205394_at   | CHEK1   | checkpoint kinase 1                                                                               | 1111  | 1.025967 | 0.001414 | 0.025236 |
| 208966_x_at | IFI16   | interferon, gamma-inducible protein 16                                                            | 3428  | 1.261519 | 0.001413 | 0.025236 |
| 202227_s_at | BRD8    | bromodomain containing 8                                                                          | 10902 | 1.211398 | 0.001397 | 0.025152 |
| 202983_at   | HLTF    | helicase-like transcription factor                                                                | 6596  | 1.292442 | 0.001395 | 0.025148 |
| 218966_at   | MYO5C   | myosin VC                                                                                         | 55930 | 1.153543 | 0.001385 | 0.025003 |
| 208787_at   | MRPL3   | mitochondrial ribosomal protein L3                                                                | 11222 | 1.176304 | 0.001376 | 0.02497  |
| 203427_at   | ASF1A   | ASF1 anti-silencing function 1 homolog A ( <i>S. cerevisiae</i> )                                 | 25842 | 1.059991 | 0.001373 | 0.02497  |
| 201260_s_at | SYPL1   | synaptophysin-like 1                                                                              | 6856  | 1.204425 | 0.001372 | 0.02497  |
| 212652_s_at | SNX4    | sorting nexin 4                                                                                   | 8723  | 1.052201 | 0.001368 | 0.024963 |
| 217850_at   | GNL3    | guanine nucleotide binding protein-like 3 (nucleolar)                                             | 26354 | 1.41406  | 0.00135  | 0.024754 |
| 212435_at   | TRIM33  | tripartite motif containing 33                                                                    | 51592 | 1.036739 | 0.001348 | 0.024743 |
| 210983_s_at | MCM7    | minichromosome maintenance complex component 7                                                    | 4176  | 1.380913 | 0.001341 | 0.024732 |
| 204510_at   | CDC7    | cell division cycle 7                                                                             | 8317  | 1.373466 | 0.001299 | 0.024412 |
| 201970_s_at | NASP    | nuclear autoantigenic sperm protein (histone-binding)                                             | 4678  | 1.246396 | 0.00128  | 0.024202 |
| 214043_at   | PTPRD   | protein tyrosine phosphatase, receptor type, D                                                    | 5789  | 1.253071 | 0.001271 | 0.02415  |
| 209572_s_at | EED     | embryonic ectoderm development                                                                    | 8726  | 1.058266 | 0.00127  | 0.02415  |
| 202890_at   | MAP7    | microtubule-associated protein 7                                                                  | 9053  | 1.299804 | 0.001265 | 0.02408  |
| 201129_at   | SRSF7   | serine/arginine-rich splicing factor 7                                                            | 6432  | 1.119633 | 0.001254 | 0.023956 |
| 201699_at   | PSMC6   | proteasome (prosome, macropain) 26S subunit, ATPase, 6                                            | 5706  | 1.503145 | 0.00122  | 0.023629 |
| 212266_s_at | SRSF5   | serine/arginine-rich splicing factor 5                                                            | 6430  | 1.41576  | 0.001217 | 0.023629 |
| 206544_x_at | SMARCA2 | SWI/SNF related, matrix associated, actin dependent regulator of chromatin, subfamily a, member 2 | 6595  | 1.067396 | 0.001209 | 0.023601 |
| 209049_s_at | ZMYND8  | zinc finger, MYND-type containing 8                                                               | 23613 | 1.006778 | 0.001203 | 0.023563 |
| 213313_at   | RABGAP1 | RAB GTPase activating protein 1                                                                   | 23637 | 1.398753 | 0.001197 | 0.0235   |
| 222204_s_at | RRN3    | RRN3 RNA polymerase I transcription factor homolog ( <i>S. cerevisiae</i> )                       | 54700 | 1.07798  | 0.001196 | 0.0235   |

|             |          |                                                                                                   |        |          |          |          |
|-------------|----------|---------------------------------------------------------------------------------------------------|--------|----------|----------|----------|
| 203362_s_at | MAD2L1   | MAD2 mitotic arrest deficient-like 1 (yeast)                                                      | 4085   | 1.334952 | 0.001171 | 0.02321  |
| 221264_s_at | TARDBP   | TAR DNA binding protein                                                                           | 23435  | 1.148261 | 0.00117  | 0.02321  |
| 204009_s_at | KRAS     | v-Ki-ras2 Kirsten rat sarcoma viral oncogene homolog                                              | 3845   | 1.15051  | 0.001169 | 0.02321  |
| 213416_at   | ITGA4    | integrin, alpha 4 (antigen CD49D, alpha 4 subunit of VLA-4 receptor)                              | 3676   | 1.585393 | 0.00116  | 0.023183 |
| 200993_at   | IPO7     | importin 7                                                                                        | 10527  | 1.052977 | 0.001144 | 0.023074 |
| 202911_at   | MSH6     | mutS homolog 6 (E. coli)                                                                          | 2956   | 1.406267 | 0.00114  | 0.023016 |
| 201619_at   | PRDX3    | peroxiredoxin 3                                                                                   | 10935  | 1.166794 | 0.001136 | 0.02301  |
| 203743_s_at | TDG      | thymine-DNA glycosylase                                                                           | 6996   | 1.30963  | 0.00113  | 0.022997 |
| 212199_at   | MRFAP1L1 | Morf4 family associated protein 1-like 1                                                          | 114932 | 1.630757 | 0.001123 | 0.022952 |
| 202164_s_at | CNOT8    | CCR4-NOT transcription complex, subunit 8                                                         | 9337   | 1.199704 | 0.001118 | 0.022906 |
| 204809_at   | CLPX     | ClpX caseinolytic peptidase X homolog (E. coli)                                                   | 10845  | 1.04299  | 0.001099 | 0.02276  |
| 206542_s_at | SMARCA2  | SWI/SNF related, matrix associated, actin dependent regulator of chromatin, subfamily a, member 2 | 6595   | 1.42069  | 0.001047 | 0.022288 |
| 203948_s_at | MPO      | myeloperoxidase                                                                                   | 4353   | 1.629289 | 0.001047 | 0.022288 |
| 200927_s_at | RAB14    | RAB14, member RAS oncogene family                                                                 | 51552  | 1.113603 | 0.001045 | 0.022285 |
| 205961_s_at | PSIP1    | PC4 and SFRS1 interacting protein 1                                                               | 11168  | 1.119456 | 0.001035 | 0.022115 |
| 203139_at   | DAPK1    | death-associated protein kinase 1                                                                 | 1612   | 1.135088 | 0.001004 | 0.021669 |
| 219485_s_at | PSMD10   | proteasome (prosome, macropain) 26S subunit, non-ATPase, 10                                       | 5716   | 1.237831 | 0.000994 | 0.021584 |
| 202169_s_at | AASDHPPT | aminoadipate-semialdehyde dehydrogenase-phosphopantetheinyl transferase                           | 60496  | 1.491517 | 0.000983 | 0.021447 |
| 213761_at   | MDM1     | Mdm1 nuclear protein homolog (mouse)                                                              | 56890  | 1.12881  | 0.000976 | 0.02135  |
| 212544_at   | ZNHIT3   | zinc finger, HIT-type containing 3                                                                | 9326   | 1.294137 | 0.000971 | 0.0213   |
| 201368_at   | ZFP36L2  | ZFP36 ring finger protein-like 2                                                                  | 678    | 1.289879 | 0.000961 | 0.021237 |
| 218882_s_at | WDR3     | WD repeat domain 3                                                                                | 10885  | 1.059399 | 0.000955 | 0.021168 |
| 202431_s_at | MYC      | v-myc myelocytomatosis viral oncogene homolog (avian)                                             | 4609   | 1.493528 | 0.000946 | 0.02101  |
| 217828_at   | SLTM     | SAFB-like, transcription modulator                                                                | 79811  | 1.118355 | 0.000938 | 0.020912 |
| 201111_at   | CSE1L    | CSE1 chromosome segregation 1-like (yeast)                                                        | 1434   | 1.623491 | 0.000932 | 0.020833 |
| 203474_at   | IQGAP2   | IQ motif containing GTPase activating protein 2                                                   | 10788  | 1.614975 | 0.000922 | 0.020814 |
| 217906_at   | KLHDC2   | kelch domain containing 2                                                                         | 23588  | 1.142864 | 0.00092  | 0.020814 |
| 203531_at   | CUL5     | cullin 5                                                                                          | 8065   | 1.096581 | 0.000891 | 0.020435 |
| 202746_at   | ITM2A    | integral membrane protein 2A                                                                      | 9452   | 1.664011 | 0.000885 | 0.020363 |
| 209421_at   | MSH2     | mutS homolog 2, colon cancer, nonpolyposis type 1 (E. coli)                                       | 4436   | 1.490121 | 0.00088  | 0.020343 |

|             |         |                                                                                                        |           |          |          |          |
|-------------|---------|--------------------------------------------------------------------------------------------------------|-----------|----------|----------|----------|
| 213698_at   | ZMYM6NB | ZMYM6 neighbor                                                                                         | 100506144 | 1.042591 | 0.00087  | 0.020236 |
| 218605_at   | TFB2M   | transcription factor B2, mitochondrial                                                                 | 64216     | 1.183958 | 0.000854 | 0.02007  |
| 201947_s_at | CCT2    | chaperonin containing TCP1, subunit 2 (beta)                                                           | 10576     | 1.143067 | 0.000853 | 0.02007  |
| 202602_s_at | HTATSF1 | HIV-1 Tat specific factor 1                                                                            | 27336     | 1.187599 | 0.000849 | 0.020015 |
| 202930_s_at | SUCLA2  | succinate-CoA ligase, ADP-forming, beta subunit                                                        | 8803      | 1.176902 | 0.000838 | 0.019818 |
| 201277_s_at | HNRNPAB | heterogeneous nuclear ribonucleoprotein A/B                                                            | 3182      | 1.014906 | 0.000822 | 0.019567 |
| 208798_x_at | GOLGA8A | golgin A8 family, member A                                                                             | 23015     | 1.082102 | 0.000821 | 0.019567 |
| 202413_s_at | USP1    | ubiquitin specific peptidase 1                                                                         | 7398      | 1.360578 | 0.000801 | 0.01926  |
| 201742_x_at | SRSF1   | serine/arginine-rich splicing factor 1                                                                 | 6426      | 1.198562 | 0.000799 | 0.01924  |
| 218014_at   | NUP85   | nucleoporin 85kDa                                                                                      | 79902     | 1.180004 | 0.000796 | 0.019229 |
| 204240_s_at | SMC2    | structural maintenance of chromosomes 2                                                                | 10592     | 1.406601 | 0.000787 | 0.01907  |
| 209337_at   | PSIP1   | PC4 and SFRS1 interacting protein 1                                                                    | 11168     | 1.241851 | 0.000784 | 0.019026 |
| 201273_s_at | SRP9    | signal recognition particle 9kDa                                                                       | 6726      | 1.202073 | 0.000784 | 0.019026 |
| 222303_at   | ---     | ---                                                                                                    |           | 1.254922 | 0.000781 | 0.019002 |
| 212330_at   | TFDP1   | transcription factor Dp-1                                                                              | 7027      | 1.341814 | 0.00078  | 0.019002 |
| 203432_at   | TMPO    | thymopoietin                                                                                           | 7112      | 1.068195 | 0.000768 | 0.01881  |
| 203493_s_at | CEP57   | centrosomal protein 57kDa                                                                              | 9702      | 1.03691  | 0.000766 | 0.018788 |
| 202330_s_at | UNG     | uracil-DNA glycosylase                                                                                 | 7374      | 1.326002 | 0.000761 | 0.018729 |
| 209814_at   | ZNF330  | zinc finger protein 330                                                                                | 27309     | 1.444996 | 0.000758 | 0.018729 |
| 203560_at   | GGH     | gamma-glutamyl hydrolase (conjugase, folylpolygammaglutamyl hydrolase)                                 | 8836      | 1.446967 | 0.00075  | 0.018617 |
| 209112_at   | CDKN1B  | cyclin-dependent kinase inhibitor 1B (p27, Kip1)                                                       | 1027      | 1.181993 | 0.000749 | 0.018617 |
| 35974_at    | LRMP    | lymphoid-restricted membrane protein                                                                   | 4033      | 1.001783 | 0.000732 | 0.018537 |
| 208643_s_at | XRCC5   | X-ray repair complementing defective repair in Chinese hamster cells 5 (double-strand-break rejoining) | 7520      | 1.057033 | 0.000731 | 0.018525 |
| 214651_s_at | HOXA9   | homeobox A9                                                                                            | 3205      | 1.466349 | 0.000687 | 0.017825 |
| 204767_s_at | FEN1    | flap structure-specific endonuclease 1                                                                 | 2237      | 1.47296  | 0.000685 | 0.017799 |
| 202658_at   | PEX11B  | peroxisomal biogenesis factor 11 beta                                                                  | 8799      | 1.013624 | 0.000684 | 0.017799 |
| 218989_x_at | SLC30A5 | solute carrier family 30 (zinc transporter), member 5                                                  | 64924     | 1.011398 | 0.000683 | 0.017799 |
| 212740_at   | PIK3R4  | phosphoinositide-3-kinase, regulatory subunit 4                                                        | 30849     | 1.016978 | 0.000678 | 0.017687 |
| 212378_at   | GART    | phosphoribosylglycinamide formyltransferase, phosphoribosylglycinamide synthetase,                     | 2618      | 1.210756 | 0.000671 | 0.017573 |
| 221931_s_at | SEH1L   | phosphoribosylaminoimidazole synthetase                                                                | 81929     | 1.151366 | 0.000671 | 0.017573 |
|             |         | SEH1-like ( <i>S. cerevisiae</i> )                                                                     |           |          |          |          |

|             |          |                                                                   |        |          |          |          |
|-------------|----------|-------------------------------------------------------------------|--------|----------|----------|----------|
| 201830_s_at | NET1     | neuroepithelial cell transforming 1                               | 10276  | 1.193353 | 0.000654 | 0.017314 |
| 202174_s_at | PCM1     | pericentriolar material 1                                         | 5108   | 1.195075 | 0.000641 | 0.017181 |
| 202717_s_at | CDC16    | cell division cycle 16                                            | 8881   | 1.000687 | 0.000632 | 0.017087 |
| 204720_s_at | DNAJC6   | DnaJ (Hsp40) homolog, subfamily C, member 6                       | 9829   | 1.165169 | 0.00063  | 0.017071 |
| 202503_s_at | KIAA0101 | KIAA0101                                                          | 9768   | 1.410664 | 0.000627 | 0.01707  |
| 212513_s_at | USP33    | ubiquitin specific peptidase 33                                   | 23032  | 1.349055 | 0.000623 | 0.01703  |
| 203583_at   | UNC50    | unc-50 homolog (C. elegans)                                       | 25972  | 1.021413 | 0.000607 | 0.016773 |
| 209199_s_at | MEF2C    | myocyte enhancer factor 2C                                        | 4208   | 1.384786 | 0.000605 | 0.016755 |
| 203949_at   | MPO      | myeloperoxidase                                                   | 4353   | 2.09466  | 0.0006   | 0.016728 |
| 213088_s_at | DNAJC9   | DnaJ (Hsp40) homolog, subfamily C, member 9                       | 23234  | 1.165365 | 0.0006   | 0.016728 |
| 201873_s_at | ABCE1    | ATP-binding cassette, sub-family E (OABP), member 1               | 6059   | 1.123959 | 0.000598 | 0.016728 |
| 201518_at   | CBX1     | chromobox homolog 1                                               | 10951  | 1.118253 | 0.000591 | 0.016699 |
| 221771_s_at | MPHOSPH8 | M-phase phosphoprotein 8                                          | 54737  | 1.003732 | 0.000588 | 0.016642 |
| 218236_s_at | PRKD3    | protein kinase D3                                                 | 23683  | 1.039419 | 0.00058  | 0.016542 |
| 218979_at   | RMI1     | RMI1, RecQ mediated genome instability 1, homolog (S. cerevisiae) | 80010  | 1.012559 | 0.000577 | 0.016542 |
| 201532_at   | PSMA3    | proteasome (prosome, macropain) subunit, alpha type, 3            | 5684   | 1.445319 | 0.000575 | 0.016531 |
| 212653_s_at | EHBP1    | EH domain binding protein 1                                       | 23301  | 1.032735 | 0.000566 | 0.016422 |
| 210338_s_at | HSPA8    | heat shock 70kDa protein 8                                        | 3312   | 1.574514 | 0.000564 | 0.016422 |
| 218642_s_at | CHCHD7   | coiled-coil-helix-coiled-coil-helix domain containing 7           | 79145  | 1.029917 | 0.000561 | 0.016422 |
| 221970_s_at | NOL11    | nucleolar protein 11                                              | 25926  | 1.054307 | 0.00056  | 0.016422 |
| 202741_at   | PRKACB   | protein kinase, cAMP-dependent, catalytic, beta                   | 5567   | 1.048386 | 0.000557 | 0.016422 |
| 209905_at   | HOXA9    | homeobox A9                                                       | 3205   | 1.24736  | 0.000554 | 0.016422 |
| 202589_at   | TYMS     | thymidylate synthetase                                            | 7298   | 1.65426  | 0.000548 | 0.01628  |
| 200071_at   | SMNDC1   | survival motor neuron domain containing 1                         | 10285  | 1.034914 | 0.000544 | 0.016265 |
| 201303_at   | EIF4A3   | eukaryotic translation initiation factor 4A3                      | 9775   | 1.17097  | 0.000539 | 0.016206 |
| 205632_s_at | PIP5K1B  | phosphatidylinositol-4-phosphate 5-kinase, type I, beta           | 8395   | 1.175229 | 0.000533 | 0.016113 |
| 215380_s_at | GGCT     | gamma-glutamylcyclotransferase                                    | 79017  | 1.189841 | 0.000531 | 0.016099 |
| 203765_at   | GCA      | granalcin, EF-hand calcium binding protein                        | 25801  | 1.046003 | 0.00053  | 0.016099 |
| 220865_s_at | PDSS1    | prenyl (decaprenyl) diphosphate synthase, subunit 1               | 23590  | 1.074485 | 0.000525 | 0.016054 |
| 202446_s_at | PLSCR1   | phospholipid scramblase 1                                         | 5359   | 1.327281 | 0.000524 | 0.01605  |
| 200970_s_at | SERP1    | stress-associated endoplasmic reticulum protein 1                 | 27230  | 1.075633 | 0.000512 | 0.015879 |
| 216920_s_at | TARP     | TCR gamma alternate reading frame protein                         | 445347 | 1.485156 | 0.000485 | 0.015374 |
| 212693_at   | MDN1     | MDN1, midasin homolog (yeast)                                     | 23195  | 1.087501 | 0.000484 | 0.015374 |



|             |          |                                                                                          |        |          |          |          |
|-------------|----------|------------------------------------------------------------------------------------------|--------|----------|----------|----------|
| 213359_at   | HNRNPD   | heterogeneous nuclear ribonucleoprotein D (AU-rich element RNA binding protein 1, 37kDa) | 3184   | 1.09076  | 0.000478 | 0.015321 |
| 206102_at   | GINS1    | GINS complex subunit 1 (Psf1 homolog)                                                    | 9837   | 1.575105 | 0.000474 | 0.015221 |
| 202950_at   | CRYZ     | crystallin, zeta (quinone reductase)                                                     | 1429   | 1.315997 | 0.000472 | 0.015221 |
| 202395_at   | NSF      | N-ethylmaleimide-sensitive factor                                                        | 4905   | 1.021689 | 0.000471 | 0.015221 |
| 220615_s_at | FAR2     | fatty acyl CoA reductase 2                                                               | 55711  | 1.050613 | 0.000469 | 0.015212 |
| 211700_s_at | TRO      | trophinin                                                                                | 7216   | 1.068948 | 0.000465 | 0.015212 |
| 206095_s_at | SRSF10   | serine/arginine-rich splicing factor 10                                                  | 10772  | 1.179453 | 0.000464 | 0.015212 |
| 208694_at   | PRKDC    | protein kinase, DNA-activated, catalytic polypeptide                                     | 5591   | 1.097773 | 0.000458 | 0.015075 |
| 214141_x_at | SRSF7    | serine/arginine-rich splicing factor 7                                                   | 6432   | 1.331333 | 0.000439 | 0.014608 |
| 203517_at   | MTX2     | metaxin 2                                                                                | 10651  | 1.225852 | 0.000439 | 0.014608 |
| 205857_at   | SLC18A2  | solute carrier family 18 (vesicular monoamine), member 2                                 | 6571   | 1.065076 | 0.000431 | 0.014432 |
| 203856_at   | VRK1     | vaccinia related kinase 1                                                                | 7443   | 1.237886 | 0.00043  | 0.014432 |
| 203372_s_at | SOCS2    | suppressor of cytokine signaling 2                                                       | 8835   | 1.09312  | 0.00042  | 0.014308 |
| 221652_s_at | ASUN     | asunder, spermatogenesis regulator                                                       | 55726  | 1.363988 | 0.000412 | 0.014181 |
| 212690_at   | DDHD2    | DDHD domain containing 2                                                                 | 23259  | 1.236377 | 0.000412 | 0.014181 |
| 208808_s_at | HMGB2    | high mobility group box 2                                                                | 3148   | 1.445021 | 0.000402 | 0.014069 |
| 212896_at   | SKIV2L2  | superkiller viralicidic activity 2-like 2 ( <i>S. cerevisiae</i> )                       | 23517  | 1.098253 | 0.000395 | 0.013905 |
| 221622_s_at | TMEM126B | transmembrane protein 126B                                                               | 55863  | 1.103945 | 0.000394 | 0.013871 |
| 218303_x_at | KRCC1    | lysine-rich coiled-coil 1                                                                | 51315  | 1.054683 | 0.000393 | 0.013857 |
| 201479_at   | DKC1     | dyskeratosis congenita 1, dyskerin                                                       | 1736   | 1.261576 | 0.00039  | 0.013806 |
| 203156_at   | AKAP11   | A kinase (PRKA) anchor protein 11                                                        | 11215  | 1.181561 | 0.000384 | 0.013683 |
| 201756_at   | RPA2     | replication protein A2, 32kDa                                                            | 6118   | 1.039715 | 0.000379 | 0.013533 |
| 209903_s_at | ATR      | ataxia telangiectasia and Rad3 related                                                   | 545    | 1.074716 | 0.000376 | 0.013488 |
| 206976_s_at | HSPH1    | heat shock 105kDa/110kDa protein 1                                                       | 10808  | 1.254331 | 0.000376 | 0.013488 |
| 219454_at   | EGFL6    | EGF-like-domain, multiple 6                                                              | 25975  | 1.30877  | 0.000367 | 0.013369 |
| 211144_x_at | TARP     | TCR gamma alternate reading frame protein                                                | 445347 | 1.365625 | 0.000366 | 0.013369 |
| 205133_s_at | HSPE1    | heat shock 10kDa protein 1 (chaperonin 10)                                               | 3336   | 1.081382 | 0.000365 | 0.013369 |
| 202429_s_at | PPP3CA   | protein phosphatase 3, catalytic subunit, alpha isozyme                                  | 5530   | 1.056462 | 0.000363 | 0.013369 |
| 210038_at   | PRKCQ    | protein kinase C, theta                                                                  | 5588   | 1.046788 | 0.000358 | 0.013295 |
| 205668_at   | LY75     | lymphocyte antigen 75                                                                    | 4065   | 1.075449 | 0.000357 | 0.013295 |
| 201515_s_at | TSN      | translin                                                                                 | 7247   | 1.30897  | 0.000349 | 0.01317  |
| 221825_at   | ANGEL2   | angel homolog 2 ( <i>Drosophila</i> )                                                    | 90806  | 1.010739 | 0.000347 | 0.013115 |
| 212168_at   | RBM12    | RNA binding motif protein 12                                                             | 10137  | 1.209363 | 0.000346 | 0.013115 |

|             |         |                                                                                                                      |       |          |          |          |
|-------------|---------|----------------------------------------------------------------------------------------------------------------------|-------|----------|----------|----------|
| 201555_at   | MCM3    | minichromosome maintenance complex component 3                                                                       | 4172  | 1.057831 | 0.000343 | 0.013089 |
| 208766_s_at | HNRNPR  | heterogeneous nuclear ribonucleoprotein R                                                                            | 10236 | 1.04567  | 0.000341 | 0.013032 |
| 213294_at   | EIF2AK2 | eukaryotic translation initiation factor 2-alpha kinase 2                                                            | 5610  | 1.224521 | 0.000339 | 0.012995 |
| 217956_s_at | ENOPH1  | enolase-phosphatase 1                                                                                                | 58478 | 1.13057  | 0.000325 | 0.012646 |
| 212211_at   | ANKRD17 | ankyrin repeat domain 17                                                                                             | 26057 | 1.06166  | 0.000321 | 0.012541 |
| 218396_at   | VPS13C  | vacuolar protein sorting 13 homolog C ( <i>S. cerevisiae</i> )                                                       | 54832 | 1.169643 | 0.000315 | 0.012391 |
| 202020_s_at | LANCL1  | LanC lantibiotic synthetase component C-like 1 (bacterial)                                                           | 10314 | 1.265915 | 0.000314 | 0.012374 |
| 213304_at   | FAM179B | family with sequence similarity 179, member B                                                                        | 23116 | 1.05681  | 0.000311 | 0.01229  |
| 214093_s_at | FUBP1   | far upstream element (FUSE) binding protein 1                                                                        | 8880  | 1.19343  | 0.000311 | 0.01229  |
| 221761_at   | ADSS    | adenylosuccinate synthase                                                                                            | 159   | 1.010834 | 0.000308 | 0.012252 |
| 201386_s_at | DHX15   | DEAH (Asp-Glu-Ala-His) box polypeptide 15<br>acidic (leucine-rich) nuclear phosphoprotein 32 family,<br>member E     | 1665  | 1.650845 | 0.000306 | 0.012244 |
| 221505_at   | ANP32E  |                                                                                                                      | 81611 | 1.183054 | 0.000303 | 0.012139 |
| 218127_at   | NFYB    | nuclear transcription factor Y, beta                                                                                 | 4801  | 1.104339 | 0.00029  | 0.011904 |
| 219303_at   | RNF219  | ring finger protein 219                                                                                              | 79596 | 1.119496 | 0.000279 | 0.011636 |
| 218133_s_at | NIF3L1  | NIF3 NGG1 interacting factor 3-like 1 ( <i>S. cerevisiae</i> )                                                       | 60491 | 1.192936 | 0.000269 | 0.011358 |
| 203428_s_at | ASF1A   | ASF1 anti-silencing function 1 homolog A ( <i>S. cerevisiae</i> )                                                    | 25842 | 1.128273 | 0.000268 | 0.011351 |
| 219037_at   | RRP15   | ribosomal RNA processing 15 homolog ( <i>S. cerevisiae</i> )                                                         | 51018 | 1.057006 | 0.000267 | 0.011351 |
| 218889_at   | NOC3L   | nucleolar complex associated 3 homolog ( <i>S. cerevisiae</i> )                                                      | 64318 | 1.366019 | 0.000262 | 0.011306 |
| 201413_at   | HSD17B4 | hydroxysteroid (17-beta) dehydrogenase 4                                                                             | 3295  | 1.140766 | 0.000255 | 0.011131 |
| 212526_at   | SPG20   | spastic paraplegia 20 (Troyer syndrome)                                                                              | 23111 | 1.026783 | 0.000251 | 0.01101  |
| 208021_s_at | RFC1    | replication factor C (activator 1) 1, 145kDa                                                                         | 5981  | 1.039138 | 0.00025  | 0.010974 |
| 213253_at   | SMC2    | structural maintenance of chromosomes 2                                                                              | 10592 | 1.034612 | 0.000246 | 0.010839 |
| 218713_at   | NARG2   | NMDA receptor regulated 2                                                                                            | 79664 | 1.010022 | 0.000244 | 0.010824 |
| 209092_s_at | GLOD4   | glyoxalase domain containing 4                                                                                       | 51031 | 1.452265 | 0.000233 | 0.010534 |
| 208634_s_at | MACF1   | microtubule-actin crosslinking factor 1                                                                              | 23499 | 1.053724 | 0.000229 | 0.010503 |
| 202854_at   | HPRT1   | hypoxanthine phosphoribosyltransferase 1                                                                             | 3251  | 1.377438 | 0.000227 | 0.010458 |
| 202345_s_at | FABP5   | fatty acid binding protein 5 (psoriasis-associated)<br>synaptotagmin binding, cytoplasmic RNA interacting<br>protein | 2171  | 1.412774 | 0.000223 | 0.010332 |
| 217832_at   | SYNCRIP |                                                                                                                      | 10492 | 1.449861 | 0.000222 | 0.010305 |
| 220742_s_at | NGLY1   | N-glycanase 1                                                                                                        | 55768 | 1.055086 | 0.00022  | 0.010287 |
| 202318_s_at | SENPE6  | SUMO1/sentrin specific peptidase 6                                                                                   | 26054 | 1.021802 | 0.000214 | 0.010126 |
| 202892_at   | CDC23   | cell division cycle 23                                                                                               | 8697  | 1.142138 | 0.000212 | 0.010103 |
| 201964_at   | SETX    | senataxin                                                                                                            | 23064 | 1.253372 | 0.000211 | 0.010103 |

|             |          |                                                                                                        |        |          |          |          |
|-------------|----------|--------------------------------------------------------------------------------------------------------|--------|----------|----------|----------|
| 209056_s_at | CDC5L    | cell division cycle 5-like                                                                             | 988    | 1.214199 | 0.000208 | 0.010028 |
| 214047_s_at | MBD4     | methyl-CpG binding domain protein 4                                                                    | 8930   | 1.011612 | 0.000208 | 0.010028 |
| 201603_at   | PPP1R12A | protein phosphatase 1, regulatory subunit 12A                                                          | 4659   | 1.089584 | 0.000204 | 0.00993  |
| 208716_s_at | TMCO1    | transmembrane and coiled-coil domains 1                                                                | 54499  | 1.113356 | 0.000202 | 0.009867 |
| 218710_at   | TTC27    | tetratricopeptide repeat domain 27                                                                     | 55622  | 1.090229 | 0.000201 | 0.009867 |
| 216221_s_at | PUM2     | pumilio homolog 2 (Drosophila)                                                                         | 23369  | 1.105518 | 0.000201 | 0.009867 |
| 202107_s_at | MCM2     | minichromosome maintenance complex component 2                                                         | 4171   | 1.506995 | 0.000201 | 0.009867 |
| 214453_s_at | IFI44    | interferon-induced protein 44                                                                          | 10561  | 1.719005 | 0.0002   | 0.009867 |
| 208775_at   | XPO1     | exportin 1 (CRM1 homolog, yeast)                                                                       | 7514   | 1.473631 | 0.000198 | 0.009851 |
| 211929_at   | HNRNPA3  | heterogeneous nuclear ribonucleoprotein A3<br>protein-L-isoaspartate (D-aspartate) O-methyltransferase | 220988 | 1.257569 | 0.000198 | 0.009839 |
| 212406_s_at | PCMTD2   | domain containing 2                                                                                    | 55251  | 1.452466 | 0.000196 | 0.009776 |
| 204354_at   | POT1     | protection of telomeres 1                                                                              | 25913  | 1.126965 | 0.000194 | 0.009746 |
| 218323_at   | RHOT1    | ras homolog family member T1                                                                           | 55288  | 1.007825 | 0.000186 | 0.009582 |
| 200994_at   | IPO7     | importin 7                                                                                             | 10527  | 1.001576 | 0.000186 | 0.009582 |
| 201773_at   | ADNP     | activity-dependent neuroprotector homeobox<br>Ctr9, Paf1/RNA polymerase II complex component,          | 23394  | 1.388566 | 0.000183 | 0.009532 |
| 202060_at   | CTR9     | homolog ( <i>S. cerevisiae</i> )                                                                       | 9646   | 1.453326 | 0.00018  | 0.00945  |
| 209218_at   | SQLE     | squalene epoxidase                                                                                     | 6713   | 1.758399 | 0.000177 | 0.009364 |
| 209580_s_at | MBD4     | methyl-CpG binding domain protein 4                                                                    | 8930   | 1.160508 | 0.000174 | 0.009336 |
| 202633_at   | TOPBP1   | topoisomerase (DNA) II binding protein 1<br>ATPase, aminophospholipid transporter (APLT), class I,     | 11073  | 1.197566 | 0.000173 | 0.009336 |
| 213106_at   | ATP8A1   | type 8A, member 1                                                                                      | 10396  | 1.20933  | 0.000168 | 0.009246 |
| 212058_at   | U2SURP   | U2 snRNP-associated SURP domain containing                                                             | 23350  | 1.398897 | 0.000168 | 0.009246 |
| 212408_at   | TOR1AIP1 | torsin A interacting protein 1                                                                         | 26092  | 1.153349 | 0.000163 | 0.009063 |
| 203067_at   | PDHX     | pyruvate dehydrogenase complex, component X                                                            | 8050   | 1.024437 | 0.00016  | 0.009007 |
| 202184_s_at | NUP133   | nucleoporin 133kDa                                                                                     | 55746  | 1.163427 | 0.000156 | 0.008893 |
| 204749_at   | NAP1L3   | nucleosome assembly protein 1-like 3                                                                   | 4675   | 1.756608 | 0.000149 | 0.008702 |
| 212621_at   | TMEM194A | transmembrane protein 194A                                                                             | 23306  | 1.117235 | 0.000148 | 0.008702 |
| 200723_s_at | CAPRIN1  | cell cycle associated protein 1                                                                        | 4076   | 1.360735 | 0.000145 | 0.008669 |
| 219008_at   | C2orf43  | chromosome 2 open reading frame 43                                                                     | 60526  | 1.160627 | 0.000144 | 0.008657 |
| 202220_at   | KIAA0907 | KIAA0907                                                                                               | 22889  | 1.542705 | 0.000144 | 0.008657 |
| 211987_at   | TOP2B    | topoisomerase (DNA) II beta 180kDa                                                                     | 7155   | 1.023919 | 0.000143 | 0.008633 |
| 202441_at   | ERLIN1   | ER lipid raft associated 1                                                                             | 10613  | 1.221226 | 0.000141 | 0.008533 |

|             |          |                                                                                      |       |          |          |          |
|-------------|----------|--------------------------------------------------------------------------------------|-------|----------|----------|----------|
| 218171_at   | VPS4B    | vacuolar protein sorting 4 homolog B ( <i>S. cerevisiae</i> )                        | 9525  | 1.099892 | 0.000138 | 0.008402 |
| 209974_s_at | BUB3     | BUB3 mitotic checkpoint protein                                                      | 9184  | 1.177194 | 0.000136 | 0.008296 |
| 219412_at   | RAB38    | RAB38, member RAS oncogene family                                                    | 23682 | 1.455958 | 0.000133 | 0.008144 |
| 205474_at   | CRLF3    | cytokine receptor-like factor 3                                                      | 51379 | 1.012784 | 0.000132 | 0.008144 |
| 222201_s_at | CASP8AP2 | caspase 8 associated protein 2                                                       | 9994  | 1.164562 | 0.00013  | 0.008097 |
| 208838_at   | CAND1    | cullin-associated and neddylation-dissociated 1                                      | 55832 | 1.071114 | 0.000128 | 0.007998 |
| 204521_at   | FAM216A  | family with sequence similarity 216, member A                                        | 29902 | 1.272748 | 0.000124 | 0.007921 |
| 213506_at   | F2RL1    | coagulation factor II (thrombin) receptor-like 1                                     | 2150  | 1.465639 | 0.000123 | 0.007906 |
| 214988_s_at | SON      | SON DNA binding protein                                                              | 6651  | 1.293714 | 0.00012  | 0.007803 |
| 218005_at   | ZNF22    | zinc finger protein 22                                                               | 7570  | 1.363822 | 0.000117 | 0.007673 |
| 202798_at   | SEC24B   | SEC24 family, member B ( <i>S. cerevisiae</i> )                                      | 10427 | 1.217371 | 0.000115 | 0.007613 |
| 203519_s_at | UPF2     | UPF2 regulator of nonsense transcripts homolog (yeast)                               | 26019 | 1.021857 | 0.000114 | 0.007613 |
| 213227_at   | PGRMC2   | progesterone receptor membrane component 2                                           | 10424 | 1.088092 | 0.000114 | 0.007613 |
| 212918_at   | RECQL    | RecQ protein-like (DNA helicase Q1-like)                                             | 5965  | 1.204724 | 0.000111 | 0.007613 |
| 218842_at   | RPAP3    | RNA polymerase II associated protein 3                                               | 79657 | 1.007012 | 0.000109 | 0.007613 |
| 218370_s_at | S100BPB  | S100P binding protein                                                                | 64766 | 1.040583 | 0.000107 | 0.007601 |
| 209043_at   | PAPSS1   | 3'-phosphoadenosine 5'-phosphosulfate synthase 1                                     | 9061  | 1.266585 | 0.000106 | 0.007558 |
| 213374_x_at | HIBCH    | 3-hydroxyisobutyryl-CoA hydrolase                                                    | 26275 | 1.37257  | 0.000104 | 0.00745  |
| 201202_at   | PCNA     | proliferating cell nuclear antigen                                                   | 5111  | 1.874541 | 0.000102 | 0.00739  |
| 208925_at   | CLDND1   | claudin domain containing 1                                                          | 56650 | 1.035219 | 0.000101 | 0.007343 |
| 208986_at   | TCF12    | transcription factor 12                                                              | 6938  | 1.13518  | 9.80E-05 | 0.00719  |
| 202706_s_at | UMPS     | uridine monophosphate synthetase                                                     | 7372  | 1.021819 | 9.71E-05 | 0.007147 |
| 222209_s_at | TMEM135  | transmembrane protein 135                                                            | 65084 | 1.139737 | 9.39E-05 | 0.007017 |
| 202956_at   | ARFGEF1  | ADP-ribosylation factor guanine nucleotide-exchange factor 1 (brefeldin A-inhibited) | 10565 | 1.048197 | 9.25E-05 | 0.006996 |
| 208877_at   | PAK2     | p21 protein (Cdc42/Rac)-activated kinase 2                                           | 5062  | 1.095691 | 9.02E-05 | 0.006891 |
| 212454_x_at | HNRPDL   | heterogeneous nuclear ribonucleoprotein D-like                                       | 9987  | 1.012227 | 8.99E-05 | 0.006891 |
| 201832_s_at | USO1     | USO1 vesicle transport factor                                                        | 8615  | 1.196724 | 8.58E-05 | 0.006807 |
| 218104_at   | TEX10    | testis expressed 10                                                                  | 54881 | 1.063963 | 8.48E-05 | 0.006794 |
| 209585_s_at | MINPP1   | multiple inositol-polyphosphate phosphatase 1                                        | 9562  | 1.5483   | 8.34E-05 | 0.006749 |
| 204160_s_at | ENPP4    | ectonucleotide pyrophosphatase/phosphodiesterase 4 (putative)                        | 22875 | 1.023317 | 8.15E-05 | 0.006724 |
| 201872_s_at | ABCE1    | ATP-binding cassette, sub-family E (OABP), member 1                                  | 6059  | 1.056302 | 7.77E-05 | 0.006497 |
| 203608_at   | ALDH5A1  | aldehyde dehydrogenase 5 family, member A1                                           | 7915  | 1.567849 | 7.76E-05 | 0.006497 |

|             |             |                                                                                       |           |          |          |          |
|-------------|-------------|---------------------------------------------------------------------------------------|-----------|----------|----------|----------|
| 201177_s_at | UBA2        | ubiquitin-like modifier activating enzyme 2                                           | 10054     | 1.011771 | 7.72E-05 | 0.006497 |
| 201663_s_at | SMC4        | structural maintenance of chromosomes 4                                               | 10051     | 1.397017 | 7.58E-05 | 0.006462 |
| 206478_at   | KIAA0125    | KIAA0125                                                                              | 9834      | 1.699586 | 7.39E-05 | 0.006369 |
| 209259_s_at | SMC3        | structural maintenance of chromosomes 3                                               | 9126      | 1.536331 | 7.36E-05 | 0.006369 |
| 201491_at   | AHSA1       | AHA1, activator of heat shock 90kDa protein ATPase homolog 1 (yeast)                  | 10598     | 1.017409 | 7.09E-05 | 0.006348 |
| 200050_at   | ZNF146      | zinc finger protein 146                                                               | 7705      | 1.112747 | 6.82E-05 | 0.006137 |
| 212798_s_at | ANKMY2      | ankyrin repeat and MYND domain containing 2                                           | 57037     | 1.282009 | 6.82E-05 | 0.006137 |
| 200597_at   | EIF3A       | eukaryotic translation initiation factor 3, subunit A                                 | 8661      | 1.15333  | 6.58E-05 | 0.006137 |
| 220416_at   | ATP8B4      | ATPase, class I, type 8B, member 4                                                    | 79895     | 1.319886 | 6.56E-05 | 0.006137 |
| 218352_at   | RCBTB1      | regulator of chromosome condensation (RCC1) and BTB (POZ) domain containing protein 1 | 55213     | 1.401043 | 6.56E-05 | 0.006137 |
| 208954_s_at | LARP4B      | La ribonucleoprotein domain family, member 4B                                         | 23185     | 1.035215 | 6.55E-05 | 0.006137 |
| 200754_x_at | SRSF2       | serine/arginine-rich splicing factor 2                                                | 6427      | 1.189498 | 6.53E-05 | 0.006137 |
| 213094_at   | GPR126      | G protein-coupled receptor 126                                                        | 57211     | 1.723615 | 6.36E-05 | 0.006137 |
| 201726_at   | ELAVL1      | ELAV (embryonic lethal, abnormal vision, Drosophila)-like 1 (Hu antigen R)            | 1994      | 1.210067 | 6.33E-05 | 0.006137 |
| 202797_at   | SACM1L      | SAC1 suppressor of actin mutations 1-like (yeast)                                     | 22908     | 1.068996 | 6.19E-05 | 0.006092 |
| 218932_at   | ZNHIT6      | zinc finger, HIT-type containing 6                                                    | 54680     | 1.533903 | 6.11E-05 | 0.006036 |
| 205909_at   | POLE2       | polymerase (DNA directed), epsilon 2, accessory subunit                               | 5427      | 1.13581  | 6.10E-05 | 0.006036 |
| 201493_s_at | PUM2        | pumilio homolog 2 (Drosophila)                                                        | 23369     | 1.045091 | 6.09E-05 | 0.006036 |
| 203605_at   | SRP54       | signal recognition particle 54kDa                                                     | 6729      | 1.336501 | 6.08E-05 | 0.006036 |
| 213737_x_at | GOLGA8H     | golgin A8 family, member H                                                            | 728498    | 1.276782 | 5.98E-05 | 0.006036 |
| 205848_at   | GAS2        | growth arrest-specific 2                                                              | 2620      | 1.882946 | 5.69E-05 | 0.005965 |
| 207483_s_at | CAND1       | cullin-associated and neddylation-dissociated 1                                       | 55832     | 1.101083 | 5.60E-05 | 0.005911 |
| 219497_s_at | BCL11A      | B-cell CLL/lymphoma 11A (zinc finger protein)                                         | 53335     | 1.051534 | 5.48E-05 | 0.00586  |
| 201664_at   | SMC4        | structural maintenance of chromosomes 4                                               | 10051     | 1.810802 | 5.39E-05 | 0.005828 |
| 209362_at   | MED21       | mediator complex subunit 21                                                           | 9412      | 1.351739 | 5.36E-05 | 0.005828 |
| 201458_s_at | BUB3        | BUB3 mitotic checkpoint protein                                                       | 9184      | 1.194027 | 5.30E-05 | 0.005828 |
| 203804_s_at | LUC7L3      | LUC7-like 3 (S. cerevisiae)                                                           | 51747     | 1.117694 | 5.28E-05 | 0.005828 |
| 206316_s_at | KNTC1       | kinetochore associated 1                                                              | 9735      | 1.132251 | 5.10E-05 | 0.00579  |
| 204030_s_at | IQCJ-SCHIP1 | IQCJ-SCHIP1 readthrough                                                               | 100505385 | 1.123787 | 5.04E-05 | 0.005746 |
| 218437_s_at | LZTFL1      | leucine zipper transcription factor-like 1                                            | 54585     | 1.226372 | 4.98E-05 | 0.005732 |
| 202502_at   | ACADM       | acyl-CoA dehydrogenase, C-4 to C-12 straight chain                                    | 34        | 1.024159 | 4.94E-05 | 0.005732 |

|             |           |                                                                             |        |          |          |          |
|-------------|-----------|-----------------------------------------------------------------------------|--------|----------|----------|----------|
| 204256_at   | ELOVL6    | ELOVL fatty acid elongase 6                                                 | 79071  | 1.533869 | 4.93E-05 | 0.005732 |
| 215165_x_at | UMPS      | uridine monophosphate synthetase                                            | 7372   | 1.104322 | 4.89E-05 | 0.005732 |
| 217814_at   | CCDC47    | coiled-coil domain containing 47                                            | 57003  | 1.430862 | 4.63E-05 | 0.005622 |
| 212944_at   | SLC5A3    | solute carrier family 5 (sodium/myo-inositol cotransporter), member 3       | 6526   | 1.422266 | 4.48E-05 | 0.005619 |
| 208861_s_at | ATRX      | alpha thalassemia/mental retardation syndrome X-linked                      | 546    | 1.174112 | 4.47E-05 | 0.005619 |
| 208848_at   | ADH5      | alcohol dehydrogenase 5 (class III), chi polypeptide                        | 128    | 1.350061 | 4.32E-05 | 0.005587 |
| 209813_x_at | TARP      | TCR gamma alternate reading frame protein                                   | 445347 | 1.675539 | 4.27E-05 | 0.005556 |
| 208860_s_at | ATRX      | alpha thalassemia/mental retardation syndrome X-linked                      | 546    | 1.385939 | 4.22E-05 | 0.005556 |
| 216199_s_at | MAP3K4    | mitogen-activated protein kinase kinase kinase 4                            | 4216   | 1.101219 | 4.03E-05 | 0.005398 |
| 218577_at   | LRRC40    | leucine rich repeat containing 40                                           | 55631  | 1.237191 | 3.99E-05 | 0.005382 |
| 208955_at   | DUT       | deoxyuridine triphosphatase                                                 | 1854   | 1.439155 | 3.92E-05 | 0.005311 |
| 203614_at   | UTP14C    | UTP14, U3 small nucleolar ribonucleoprotein, homolog C (yeast)              | 9724   | 1.05731  | 3.86E-05 | 0.005287 |
| 202540_s_at | HMGCR     | 3-hydroxy-3-methylglutaryl-CoA reductase                                    | 3156   | 1.149998 | 3.83E-05 | 0.005286 |
| 209025_s_at | SYNCRIP   | synaptotagmin binding, cytoplasmic RNA interacting protein                  | 10492  | 1.11864  | 3.81E-05 | 0.005286 |
| 221884_at   | MECOM     | MDS1 and EVI1 complex locus                                                 | 2122   | 1.313552 | 3.58E-05 | 0.005097 |
| 213677_s_at | PMS1      | PMS1 postmeiotic segregation increased 1 ( <i>S. cerevisiae</i> )           | 5378   | 1.319836 | 3.48E-05 | 0.004995 |
| 203482_at   | FAM178A   | family with sequence similarity 178, member A                               | 55719  | 1.006684 | 3.46E-05 | 0.004994 |
| 205395_s_at | MRE11A    | MRE11 meiotic recombination 11 homolog A ( <i>S. cerevisiae</i> )           | 4361   | 1.047297 | 3.44E-05 | 0.004994 |
| 205541_s_at | GSPT2     | G1 to S phase transition 2                                                  | 23708  | 1.302983 | 3.23E-05 | 0.004813 |
| 213111_at   | PIKFYVE   | phosphoinositide kinase, FYVE finger containing                             | 200576 | 1.505014 | 3.21E-05 | 0.004813 |
| 203406_at   | MFAP1     | microfibrillar-associated protein 1                                         | 4236   | 1.105243 | 2.95E-05 | 0.004627 |
| 212648_at   | DHX29     | DEAH (Asp-Glu-Ala-His) box polypeptide 29                                   | 54505  | 1.181102 | 2.90E-05 | 0.004616 |
| 212905_at   | CSTF2T    | cleavage stimulation factor, 3' pre-RNA, subunit 2, 64kDa, tau variant      | 23283  | 1.012536 | 2.79E-05 | 0.004519 |
| 203102_s_at | MGAT2     | mannosyl (alpha-1,6-)-glycoprotein beta-1,2-N-acetylglucosaminyltransferase | 4247   | 1.02975  | 2.78E-05 | 0.004519 |
| 212407_at   | METTL13   | methyltransferase like 13                                                   | 51603  | 1.183202 | 2.73E-05 | 0.004519 |
| 212584_at   | AQR       | aquarius homolog (mouse)                                                    | 9716   | 1.131181 | 2.71E-05 | 0.004519 |
| 221522_at   | ANKRD27   | ankyrin repeat domain 27 (VPS9 domain)                                      | 84079  | 1.408053 | 2.46E-05 | 0.004336 |
| 215143_at   | DPY19L2P2 | dpy-19-like 2 pseudogene 2 ( <i>C. elegans</i> )                            | 349152 | 1.163809 | 2.42E-05 | 0.004298 |
| 212402_at   | ZC3H13    | zinc finger CCCH-type containing 13                                         | 23091  | 1.411241 | 2.40E-05 | 0.004298 |
| 213005_s_at | KANK1     | KN motif and ankyrin repeat domains 1                                       | 23189  | 1.420285 | 2.37E-05 | 0.004281 |

|             |         |                                                                                                |        |          |          |          |
|-------------|---------|------------------------------------------------------------------------------------------------|--------|----------|----------|----------|
| 201086_x_at | SON     | SON DNA binding protein                                                                        | 6651   | 1.303827 | 2.37E-05 | 0.004281 |
| 205885_s_at | ITGA4   | integrin, alpha 4 (antigen CD49D, alpha 4 subunit of VLA-4 receptor)                           | 3676   | 1.152728 | 2.32E-05 | 0.004281 |
| 218957_s_at | PAAF1   | proteasomal ATPase-associated factor 1                                                         | 80227  | 1.082321 | 2.32E-05 | 0.004281 |
| 209409_at   | GRB10   | growth factor receptor-bound protein 10                                                        | 2887   | 1.411903 | 2.31E-05 | 0.004281 |
| 218428_s_at | REV1    | REV1, polymerase (DNA directed)                                                                | 51455  | 1.014141 | 2.30E-05 | 0.004281 |
| 212982_at   | ZDHHC17 | zinc finger, DHHC-type containing 17                                                           | 23390  | 1.24448  | 2.23E-05 | 0.004281 |
| 206854_s_at | MAP3K7  | mitogen-activated protein kinase kinase kinase 7                                               | 6885   | 1.362632 | 2.14E-05 | 0.004215 |
| 213164_at   | SLC5A3  | solute carrier family 5 (sodium/myo-inositol cotransporter), member 3                          | 6526   | 1.12656  | 2.14E-05 | 0.004215 |
| 209662_at   | CETN3   | centrin, EF-hand protein, 3                                                                    | 1070   | 1.780447 | 2.13E-05 | 0.004215 |
| 213092_x_at | DNAJC9  | DnaJ (Hsp40) homolog, subfamily C, member 9                                                    | 23234  | 1.281922 | 2.11E-05 | 0.004215 |
| 219130_at   | TRMT13  | tRNA methyltransferase 13 homolog ( <i>S. cerevisiae</i> )                                     | 54482  | 1.054729 | 2.09E-05 | 0.004215 |
| 218096_at   | AGPAT5  | 1-acylglycerol-3-phosphate O-acyltransferase 5                                                 | 55326  | 1.046759 | 2.05E-05 | 0.004215 |
| 200783_s_at | STMN1   | stathmin 1                                                                                     | 3925   | 1.021197 | 1.99E-05 | 0.004183 |
| 202763_at   | CASP3   | caspase 3, apoptosis-related cysteine peptidase                                                | 836    | 1.113632 | 1.97E-05 | 0.004167 |
| 206874_s_at | SLK     | STE20-like kinase                                                                              | 9748   | 1.508576 | 1.95E-05 | 0.004162 |
| 215806_x_at | TARP    | TCR gamma alternate reading frame protein                                                      | 445347 | 1.699601 | 1.94E-05 | 0.004162 |
| 218139_s_at | AP5M1   | adaptor-related protein complex 5, mu 1 subunit                                                | 55745  | 1.213838 | 1.93E-05 | 0.004162 |
| 212731_at   | ANKRD46 | ankyrin repeat domain 46                                                                       | 157567 | 1.139853 | 1.87E-05 | 0.004117 |
| 217317_s_at | HERC2P2 | hect domain and RLD 2 pseudogene 2                                                             | 400322 | 1.063595 | 1.62E-05 | 0.003764 |
| 212176_at   | PNISR   | PNN-interacting serine/arginine-rich protein                                                   | 25957  | 1.0103   | 1.62E-05 | 0.003764 |
| 218313_s_at | GALNT7  | UDP-N-acetyl-alpha-D-galactosamine:polypeptide N-acetylgalactosaminyltransferase 7 (GalNAc-T7) | 51809  | 1.507414 | 1.62E-05 | 0.003764 |
| 219083_at   | SHQ1    | SHQ1, H/ACA ribonucleoprotein assembly factor                                                  | 55164  | 1.675814 | 1.53E-05 | 0.003721 |
| 203302_at   | DCK     | deoxycytidine kinase                                                                           | 1633   | 1.276653 | 1.43E-05 | 0.003616 |
| 218515_at   | PAXBP1  | PAX3 and PAX7 binding protein 1                                                                | 94104  | 1.243818 | 1.43E-05 | 0.003616 |
| 213391_at   | DPY19L4 | dpy-19-like 4 ( <i>C. elegans</i> )                                                            | 286148 | 1.187053 | 1.29E-05 | 0.003444 |
| 202907_s_at | NBN     | nibrin                                                                                         | 4683   | 1.588244 | 1.26E-05 | 0.003444 |
| 217886_at   | EPS15   | epidermal growth factor receptor pathway substrate 15                                          | 2060   | 1.345925 | 1.23E-05 | 0.003411 |
| 218622_at   | NUP37   | nucleoporin 37kDa                                                                              | 79023  | 1.261215 | 1.22E-05 | 0.003411 |
| 208654_s_at | CD164   | CD164 molecule, sialomucin                                                                     | 8763   | 1.456204 | 1.21E-05 | 0.003411 |
| 219035_s_at | RNF34   | ring finger protein 34, E3 ubiquitin protein ligase                                            | 80196  | 1.187459 | 1.15E-05 | 0.003369 |
| 220044_x_at | LUC7L3  | LUC7-like 3 ( <i>S. cerevisiae</i> )                                                           | 51747  | 1.199028 | 1.15E-05 | 0.003369 |

|             |         |                                                                      |       |          |          |          |
|-------------|---------|----------------------------------------------------------------------|-------|----------|----------|----------|
| 218768_at   | NUP107  | nucleoporin 107kDa                                                   | 57122 | 1.457543 | 1.14E-05 | 0.003369 |
| 208405_s_at | CD164   | CD164 molecule, sialomucin                                           | 8763  | 1.103873 | 1.11E-05 | 0.003369 |
| 212675_s_at | CEP68   | centrosomal protein 68kDa                                            | 23177 | 1.33608  | 1.11E-05 | 0.003369 |
| 209200_at   | MEF2C   | myocyte enhancer factor 2C                                           | 4208  | 1.964319 | 1.10E-05 | 0.003369 |
| 209476_at   | TMX1    | thioredoxin-related transmembrane protein 1                          | 81542 | 1.209672 | 1.07E-05 | 0.003369 |
| 212474_at   | AVL9    | AVL9 homolog (S. cerevisiae)                                         | 23080 | 1.128401 | 9.17E-06 | 0.003236 |
| 203306_s_at | SLC35A1 | solute carrier family 35 (CMP-sialic acid transporter), member A1    | 10559 | 1.184632 | 9.10E-06 | 0.003236 |
| 219405_at   | TRIM68  | tripartite motif containing 68                                       | 55128 | 1.092848 | 8.27E-06 | 0.003067 |
| 217954_s_at | PHF3    | PHD finger protein 3                                                 | 23469 | 1.096771 | 8.00E-06 | 0.003017 |
| 201448_at   | TIA1    | TIA1 cytotoxic granule-associated RNA binding protein                | 7072  | 1.364827 | 7.61E-06 | 0.002919 |
| 202918_s_at | MOB4    | MOB family member 4, phocein                                         | 25843 | 1.281577 | 7.60E-06 | 0.002919 |
| 201503_at   | G3BP1   | GTPase activating protein (SH3 domain) binding protein 1             | 10146 | 1.400871 | 7.40E-06 | 0.002919 |
| 221606_s_at | HMGNS5  | high mobility group nucleosome binding domain 5                      | 79366 | 1.041186 | 7.16E-06 | 0.002919 |
| 212179_at   | PNISR   | PNN-interacting serine/arginine-rich protein                         | 25957 | 1.659487 | 7.06E-06 | 0.002919 |
| 207943_x_at | PLAGL1  | pleiomorphic adenoma gene-like 1                                     | 5325  | 1.02225  | 6.80E-06 | 0.002919 |
| 219002_at   | FASTKD1 | FAST kinase domains 1                                                | 79675 | 1.139996 | 6.78E-06 | 0.002919 |
| 219649_at   | ALG6    | ALG6, alpha-1,3-glucosyltransferase                                  | 29929 | 1.318705 | 6.36E-06 | 0.002919 |
| 218593_at   | RBM28   | RNA binding motif protein 28                                         | 55131 | 1.095331 | 6.00E-06 | 0.002867 |
| 218152_at   | HMG20A  | high mobility group 20A                                              | 10363 | 1.329726 | 5.52E-06 | 0.002834 |
| 218108_at   | UBR7    | ubiquitin protein ligase E3 component n-recognin 7 (putative)        | 55148 | 1.468044 | 4.88E-06 | 0.002649 |
| 212959_s_at | GNPTAB  | N-acetylglucosamine-1-phosphate transferase, alpha and beta subunits | 79158 | 1.108946 | 4.43E-06 | 0.002528 |
| 213653_at   | METTL3  | methyltransferase like 3                                             | 56339 | 1.135123 | 4.23E-06 | 0.002528 |
| 201218_at   | CTBP2   | C-terminal binding protein 2                                         | 1488  | 1.622964 | 4.00E-06 | 0.002528 |
| 202520_s_at | MLH1    | mutL homolog 1, colon cancer, nonpolyposis type 2 (E. coli)          | 4292  | 1.112927 | 3.95E-06 | 0.002528 |
| 209022_at   | STAG2   | stromal antigen 2                                                    | 10735 | 1.149995 | 3.82E-06 | 0.002528 |
| 218343_s_at | GTF3C3  | general transcription factor IIIC, polypeptide 3, 102kDa             | 9330  | 1.144191 | 3.71E-06 | 0.002528 |
| 219960_s_at | UCHL5   | ubiquitin carboxyl-terminal hydrolase L5                             | 51377 | 1.108112 | 3.64E-06 | 0.002528 |
| 209175_at   | SEC23IP | SEC23 interacting protein                                            | 11196 | 1.255797 | 3.63E-06 | 0.002528 |
| 218170_at   | ISOC1   | isochorismatase domain containing 1                                  | 51015 | 1.24304  | 3.49E-06 | 0.002528 |
| 209265_s_at | METTL3  | methyltransferase like 3                                             | 56339 | 1.227046 | 3.29E-06 | 0.002528 |
| 222127_s_at | EXOC1   | exocyst complex component 1                                          | 55763 | 1.394408 | 2.86E-06 | 0.002528 |



|             |         |                                                           |       |          |          |          |
|-------------|---------|-----------------------------------------------------------|-------|----------|----------|----------|
| 207002_s_at | PLAGL1  | pleiomorphic adenoma gene-like 1                          | 5325  | 1.171723 | 2.49E-06 | 0.002309 |
| 204168_at   | MGST2   | microsomal glutathione S-transferase 2                    | 4258  | 1.037395 | 1.79E-06 | 0.001991 |
| 205609_at   | ANGPT1  | angiopoietin 1                                            | 284   | 1.547029 | 1.71E-06 | 0.001991 |
| 209537_at   | EXTL2   | exostosin-like glycosyltransferase 2                      | 2135  | 1.05732  | 7.39E-07 | 0.001096 |
| 209748_at   | SPAST   | spastin                                                   | 6683  | 1.096487 | 6.60E-07 | 0.001049 |
| 218397_at   | FANCL   | Fanconi anemia, complementation group L                   | 55120 | 1.889757 | 4.53E-07 | 0.000871 |
| 210621_s_at | RASA1   | RAS p21 protein activator (GTPase activating protein) 1   | 5921  | 1.39113  | 3.67E-07 | 0.000871 |
| 201687_s_at | API5    | apoptosis inhibitor 5                                     | 8539  | 1.055434 | 1.84E-07 | 0.000682 |
| 212828_at   | SYNJ2   | synaptojanin 2                                            | 8871  | 1.111098 | 1.84E-07 | 0.000682 |
| 209007_s_at | C1orf63 | chromosome 1 open reading frame 63                        | 57035 | 1.046263 | 8.11E-08 | 0.000601 |
| 218361_at   | GOLPH3L | golgi phosphoprotein 3-like                               | 55204 | 1.174016 | 5.59E-08 | 0.000601 |
| 219913_s_at | CRNKL1  | crooked neck pre-mRNA splicing factor-like 1 (Drosophila) | 51340 | 1.468407 | 2.17E-08 | 0.000482 |

Table S5b. Genes differentially regulated by the 7 PV patients with an aggressive phenotype.

| <i>Probeset ID</i> | <i>Symbol<br/>(Na32<br/>consensus<br/>Mar13)</i> | <i>Gene Title (Na32 consensus Mar13)</i>                                                                            | <i>Entrez<br/>GeneID<br/>(consensus<br/>Mar-13)</i> | <i>Log2(FC)</i> | <i>P-Value</i> | <i>Adjusted<br/>P-Value</i> |
|--------------------|--------------------------------------------------|---------------------------------------------------------------------------------------------------------------------|-----------------------------------------------------|-----------------|----------------|-----------------------------|
| 209763_at          | CHRD1                                            | chordin-like 1                                                                                                      | 91851                                               | -1.17606        | 5.21E-09       | 6.67E-05                    |
| 210487_at          | DNTT                                             | deoxynucleotidyltransferase, terminal                                                                               | 1791                                                | -1.91383        | 6.00E-09       | 6.67E-05                    |
| 205933_at          | SETBP1                                           | SET binding protein 1                                                                                               | 26040                                               | -1.1773         | 1.51E-08       | 0.000112                    |
| 202723_s_at        | FOXO1                                            | forkhead box O1                                                                                                     | 2308                                                | -1.10201        | 4.34E-06       | 0.024108                    |
| 201324_at          | EMP1                                             | epithelial membrane protein 1                                                                                       | 2012                                                | -1.73635        | 6.04E-06       | 0.026802                    |
| 201325_s_at        | EMP1                                             | epithelial membrane protein 1                                                                                       | 2012                                                | -1.00997        | 1.48E-05       | 0.029925                    |
| 209398_at          | HIST1H1C                                         | histone cluster 1, H1c                                                                                              | 3006                                                | -2.26773        | 3.33E-05       | 0.061697                    |
| 212827_at          | IGHM                                             | immunoglobulin heavy constant mu                                                                                    | 3507                                                | -1.62695        | 0.000114       | 0.134692                    |
| 206385_s_at        | ANK3                                             | ankyrin 3, node of Ranvier (ankyrin G)                                                                              | 288                                                 | -1.01371        | 0.000117       | 0.134692                    |
| 209183_s_at        | C10orf10                                         | chromosome 10 open reading frame 10                                                                                 | 11067                                               | -1.07496        | 0.000131       | 0.139056                    |
| 209374_s_at        | IGHM                                             | immunoglobulin heavy constant mu<br>solute carrier family 2 (facilitated glucose/fructose<br>transporter), member 5 | 3507                                                | -1.78678        | 0.000238       | 0.21202                     |
| 204430_s_at        | SLC2A5                                           |                                                                                                                     | 6518                                                | -1.13053        | 0.00026        | 0.213741                    |
| 200872_at          | S100A10                                          | S100 calcium binding protein A10                                                                                    | 6281                                                | -1.47658        | 0.000279       | 0.215629                    |
| 209069_s_at        | H3F3B                                            | H3 histone, family 3B (H3.3B)                                                                                       | 3021                                                | -1.18661        | 0.000318       | 0.221129                    |
| 210592_s_at        | SAT1                                             | spermidine/spermine N1-acetyltransferase 1<br>egf-like module containing, mucin-like, hormone receptor-like<br>1    | 6303                                                | -1.08035        | 0.000376       | 0.227751                    |
| 207111_at          | EMR1                                             |                                                                                                                     | 2015                                                | -1.08619        | 0.000401       | 0.227751                    |

|             |            |                                                                                                                     |        |          |          |          |
|-------------|------------|---------------------------------------------------------------------------------------------------------------------|--------|----------|----------|----------|
| 204304_s_at | PROM1      | prominin 1                                                                                                          | 8842   | -1.82999 | 0.00042  | 0.227751 |
| 205984_at   | CRHBP      | corticotropin releasing hormone binding protein                                                                     | 1393   | -1.68559 | 0.000482 | 0.239161 |
| 218280_x_at | HIST2H2AA4 | histone cluster 2, H2aa4                                                                                            | 723790 | -2.04755 | 0.000661 | 0.271413 |
| 211997_x_at | H3F3B      | H3 histone, family 3B (H3.3B)                                                                                       | 3021   | -1.22595 | 0.000753 | 0.293064 |
| 211998_at   | H3F3B      | H3 histone, family 3B (H3.3B)                                                                                       | 3021   | -1.37161 | 0.001101 | 0.376554 |
| 214290_s_at | HIST2H2AA4 | histone cluster 2, H2aa4                                                                                            | 723790 | -2.10063 | 0.001825 | 0.399532 |
| 202888_s_at | ANPEP      | alanyl (membrane) aminopeptidase                                                                                    | 290    | -1.09433 | 0.001827 | 0.399532 |
| 210785_s_at | THEMIS2    | thymocyte selection associated family member 2                                                                      | 9473   | -1.40909 | 0.001958 | 0.412534 |
| 205402_x_at | PRSS2      | protease, serine, 2 (trypsin 2)                                                                                     | 5645   | -1.05383 | 0.002001 | 0.412534 |
| 220990_s_at | MIR21      | microRNA 21                                                                                                         | 406991 | -1.16662 | 0.002023 | 0.412534 |
| 201369_s_at | ZFP36L2    | ZFP36 ring finger protein-like 2                                                                                    | 678    | -1.42932 | 0.002729 | 0.450281 |
| 207571_x_at | THEMIS2    | thymocyte selection associated family member 2                                                                      | 9473   | -1.3478  | 0.0028   | 0.450281 |
| 212543_at   | AIM1       | absent in melanoma 1                                                                                                | 202    | -1.12719 | 0.002817 | 0.450281 |
| 204698_at   | ISG20      | interferon stimulated exonuclease gene 20kDa<br>transducin-like enhancer of split 4 (E(sp1) homolog,<br>Drosophila) | 3669   | -1.19993 | 0.002841 | 0.450281 |
| 204872_at   | TLE4       |                                                                                                                     | 7091   | -1.08661 | 0.004743 | 0.516178 |
| 211597_s_at | HOPX       | HOP homeobox                                                                                                        | 84525  | -1.35699 | 0.004787 | 0.516178 |
| 220377_at   | KIAA0125   | KIAA0125                                                                                                            | 9834   | -1.15785 | 0.004957 | 0.516178 |
| 202708_s_at | HIST2H2BE  | histone cluster 2, H2be                                                                                             | 8349   | -1.73994 | 0.00501  | 0.516178 |
| 222258_s_at | SH3BP4     | SH3-domain binding protein 4                                                                                        | 23677  | -1.25738 | 0.006817 | 0.549162 |
| 202748_at   | GBP2       | guanylate binding protein 2, interferon-inducible                                                                   | 2634   | -1.47788 | 0.007224 | 0.557788 |
| 222067_x_at | HIST1H2BD  | histone cluster 1, H2bd                                                                                             | 3017   | -1.3732  | 0.007682 | 0.562835 |
| 204805_s_at | H1FX       | H1 histone family, member X                                                                                         | 8971   | -1.45025 | 0.012357 | 0.587079 |
| 214472_at   | HIST1H2AD  | histone cluster 1, H2ad                                                                                             | 3013   | -1.33457 | 0.016968 | 0.609599 |
| 215071_s_at | HIST1H2AC  | histone cluster 1, H2ac                                                                                             | 8334   | -1.59794 | 0.020339 | 0.631601 |
| 204057_at   | IRF8       | interferon regulatory factor 8                                                                                      | 3394   | -1.01328 | 0.021285 | 0.631601 |
| 221760_at   | MAN1A1     | mannosidase, alpha, class 1A, member 1                                                                              | 4121   | -1.18372 | 0.02233  | 0.632753 |
| 208490_x_at | HIST1H2BF  | histone cluster 1, H2bf                                                                                             | 8343   | -1.14111 | 0.027318 | 0.639545 |
| 221556_at   | CDC14B     | cell division cycle 14B                                                                                             | 8555   | -1.26289 | 0.028048 | 0.64494  |
| 210387_at   | HIST1H2BG  | histone cluster 1, H2bg                                                                                             | 8339   | -1.14146 | 0.02951  | 0.651733 |
| 201416_at   | SOX4       | SRY (sex determining region Y)-box 4                                                                                | 6659   | -1.05187 | 0.032258 | 0.65293  |
| 208579_x_at | H2BFS      | H2B histone family, member S (pseudogene)                                                                           | 54145  | -1.30549 | 0.035551 | 0.658786 |
| 208527_x_at | HIST1H2BE  | histone cluster 1, H2be                                                                                             | 8344   | -1.05374 | 0.035992 | 0.658786 |
| 203708_at   | PDE4B      | phosphodiesterase 4B, cAMP-specific                                                                                 | 5142   | -1.26501 | 0.039076 | 0.662929 |

|             |           |                                                                                                                       |       |          |          |          |
|-------------|-----------|-----------------------------------------------------------------------------------------------------------------------|-------|----------|----------|----------|
| 212488_at   | COL5A1    | collagen, type V, alpha 1                                                                                             | 1289  | -1.01422 | 0.041826 | 0.666611 |
| 203140_at   | BCL6      | B-cell CLL/lymphoma 6                                                                                                 | 604   | -1.00963 | 0.04395  | 0.666724 |
| 208546_x_at | HIST1H2BH | histone cluster 1, H2bh                                                                                               | 8345  | -1.02623 | 0.048771 | 0.677506 |
| 214455_at   | HIST1H2BC | histone cluster 1, H2bc                                                                                               | 8347  | -1.16847 | 0.051456 | 0.680853 |
| 218999_at   | TMEM140   | transmembrane protein 140                                                                                             | 55281 | -1.01862 | 0.053069 | 0.682752 |
| 208018_s_at | HCK       | hemopoietic cell kinase                                                                                               | 3055  | -1.13981 | 0.05449  | 0.684183 |
| 204897_at   | PTGER4    | prostaglandin E receptor 4 (subtype EP4)<br>inhibitor of DNA binding 2, dominant negative helix-loop-helix<br>protein | 5734  | -1.13843 | 0.058834 | 0.692792 |
| 201565_s_at | ID2       | protein tyrosine phosphatase, receptor type, C                                                                        | 3398  | -1.33513 | 0.06594  | 0.694022 |
| 212587_s_at | PTPRC     | palladin, cytoskeletal associated protein                                                                             | 5788  | -1.10126 | 0.080672 | 0.719636 |
| 200897_s_at | PALLD     | dual specificity phosphatase 6                                                                                        | 23022 | -1.24085 | 0.085951 | 0.722194 |
| 208891_at   | DUSP6     | brain abundant, membrane attached signal protein 1                                                                    | 1848  | -1.07107 | 0.098612 | 0.730122 |
| 202391_at   | BASP1     | CD14 molecule                                                                                                         | 10409 | -1.1892  | 0.099272 | 0.730445 |
| 201743_at   | CD14      | Kruppel-like factor 4 (gut)                                                                                           | 929   | -1.11579 | 0.106127 | 0.731069 |
| 221841_s_at | KLF4      | histone cluster 1, H3h                                                                                                | 9314  | -1.20574 | 0.106845 | 0.731355 |
| 206110_at   | HIST1H3H  | lysozyme                                                                                                              | 8357  | -1.19698 | 0.116318 | 0.738259 |
| 213975_s_at | LYZ       | regulator of cell cycle                                                                                               | 4069  | -1.22513 | 0.117821 | 0.738667 |
| 218723_s_at | RGCC      | S100 calcium binding protein A8                                                                                       | 28984 | -1.01755 | 0.173123 | 0.764957 |
| 202917_s_at | S100A8    | chemokine (C-X-C motif) ligand 2                                                                                      | 6279  | -1.01114 | 0.365329 | 0.843162 |
| 209774_x_at | CXCL2     | CD36 molecule (thrombospondin receptor)                                                                               | 2920  | 1.127083 | 0.184971 | 0.770504 |
| 206488_s_at | CD36      | selectin P (granule membrane protein 140kDa, antigen CD62)                                                            | 948   | 1.062242 | 0.179158 | 0.767834 |
| 206049_at   | SELP      | heat shock 70kDa protein 1A                                                                                           | 6403  | 1.027039 | 0.142209 | 0.749649 |
| 202581_at   | HSPA1A    | major histocompatibility complex, class II, DQ alpha 1                                                                | 3303  | 1.07338  | 0.141805 | 0.749649 |
| 212671_s_at | HLA-DQA1  | protein S (alpha)                                                                                                     | 3117  | 1.256994 | 0.134567 | 0.747232 |
| 207808_s_at | PROS1     | hemoglobin, gamma A                                                                                                   | 5627  | 1.076302 | 0.125868 | 0.743062 |
| 204419_x_at | HBG1      | hemoglobin, gamma A                                                                                                   | 3047  | 1.666375 | 0.091429 | 0.723603 |
| 204848_x_at | HBG1      | dynamamin 3                                                                                                           | 3047  | 1.565419 | 0.086123 | 0.722194 |
| 209839_at   | DNM3      | kynureninase                                                                                                          | 26052 | 1.130837 | 0.075473 | 0.711904 |
| 217388_s_at | KYNU      | cyclin B1                                                                                                             | 8942  | 1.468314 | 0.069766 | 0.703289 |
| 214710_s_at | CCNB1     | latent transforming growth factor beta binding protein 1                                                              | 891   | 1.019442 | 0.057837 | 0.692792 |
| 202729_s_at | LTBP1     | carbonic anhydrase I                                                                                                  | 4052  | 1.205454 | 0.056194 | 0.689409 |
| 205950_s_at | CA1       | phosphoribosylaminoimidazole carboxylase,<br>phosphoribosylaminoimidazole succinocarboxamide                          | 759   | 1.154113 | 0.05527  | 0.686498 |
| 201014_s_at | PAICS     |                                                                                                                       | 10606 | 1.001269 | 0.054655 | 0.684183 |

|             |          |                                                                                       |       |          |          |          |  |
|-------------|----------|---------------------------------------------------------------------------------------|-------|----------|----------|----------|--|
|             |          | synthetase                                                                            |       |          |          |          |  |
|             |          | prostaglandin-endoperoxide synthase 1 (prostaglandin G/H synthase and cyclooxygenase) | 5742  | 1.093699 | 0.054246 | 0.684183 |  |
| 215813_s_at | PTGS1    |                                                                                       |       |          |          |          |  |
| 216063_at   | HBBP1    | hemoglobin, beta pseudogene 1                                                         | 3044  | 1.237304 | 0.051626 | 0.680853 |  |
| 209290_s_at | NFIB     | nuclear factor I/B                                                                    | 4781  | 1.089323 | 0.047583 | 0.675495 |  |
| 212224_at   | ALDH1A1  | aldehyde dehydrogenase 1 family, member A1                                            | 216   | 1.365131 | 0.047481 | 0.675495 |  |
| 207165_at   | HMMR     | hyaluronan-mediated motility receptor (RHAMM)                                         | 3161  | 1.035451 | 0.04372  | 0.666724 |  |
| 207668_x_at | PDIA6    | protein disulfide isomerase family A, member 6                                        | 10130 | 1.01888  | 0.042673 | 0.666611 |  |
| 208639_x_at | PDIA6    | protein disulfide isomerase family A, member 6                                        | 10130 | 1.087019 | 0.04232  | 0.666611 |  |
| 201202_at   | PCNA     | proliferating cell nuclear antigen                                                    | 5111  | 1.025175 | 0.040518 | 0.664974 |  |
| 202705_at   | CCNB2    | cyclin B2                                                                             | 9133  | 1.000457 | 0.037459 | 0.658786 |  |
| 202870_s_at | CDC20    | cell division cycle 20                                                                | 991   | 1.339489 | 0.036577 | 0.658786 |  |
| 217232_x_at | HBB      | hemoglobin, beta                                                                      | 3043  | 1.819046 | 0.034587 | 0.658786 |  |
| 218009_s_at | PRC1     | protein regulator of cytokinesis 1                                                    | 9055  | 1.316131 | 0.032297 | 0.65293  |  |
| 213515_x_at | HBG1     | hemoglobin, gamma A                                                                   | 3047  | 2.417287 | 0.029879 | 0.651733 |  |
| 218350_s_at | GMNN     | geminin, DNA replication inhibitor                                                    | 51053 | 1.197599 | 0.02966  | 0.651733 |  |
| 209728_at   | HLA-DRB4 | major histocompatibility complex, class II, DR beta 4                                 | 3126  | 2.147596 | 0.028176 | 0.645955 |  |
| 204023_at   | RFC4     | replication factor C (activator 1) 4, 37kDa                                           | 5984  | 1.139793 | 0.027395 | 0.640611 |  |
| 203755_at   | BUB1B    | BUB1 mitotic checkpoint serine/threonine kinase B                                     | 701   | 1.078262 | 0.026537 | 0.639024 |  |
| 202760_s_at | AKAP2    | A kinase (PRKA) anchor protein 2                                                      | 11217 | 1.132676 | 0.023696 | 0.635738 |  |
| 201477_s_at | RRM1     | ribonucleotide reductase M1                                                           | 6240  | 1.170464 | 0.02268  | 0.635738 |  |
| 218039_at   | NUSAP1   | nucleolar and spindle associated protein 1                                            | 51203 | 1.296022 | 0.022485 | 0.634539 |  |
| 209773_s_at | RRM2     | ribonucleotide reductase M2                                                           | 6241  | 1.767338 | 0.021614 | 0.631601 |  |
|             |          | apolipoprotein B mRNA editing enzyme, catalytic polypeptide-like 3B                   | 9582  | 1.217919 | 0.021271 | 0.631601 |  |
| 206632_s_at | APOBEC3B |                                                                                       |       |          |          |          |  |
| 201563_at   | SORD     | sorbitol dehydrogenase                                                                | 6652  | 1.003384 | 0.021071 | 0.631601 |  |
| 211696_x_at | HBB      | hemoglobin, beta                                                                      | 3043  | 1.960803 | 0.020716 | 0.631601 |  |
| 201490_s_at | PPIF     | peptidylprolyl isomerase F                                                            | 10105 | 1.068584 | 0.02005  | 0.62633  |  |
| 209969_s_at | STAT1    | signal transducer and activator of transcription 1, 91kDa                             | 6772  | 1.033433 | 0.018323 | 0.612297 |  |
| 202112_at   | VWF      | von Willebrand factor                                                                 | 7450  | 1.065252 | 0.017067 | 0.610194 |  |
| 211005_at   | LAT      | linker for activation of T cells                                                      | 27040 | 1.441264 | 0.016468 | 0.605865 |  |
| 206102_at   | GINS1    | GINS complex subunit 1 (Psf1 homolog)                                                 | 9837  | 1.19856  | 0.014854 | 0.595174 |  |
| 206698_at   | XK       | X-linked Kx blood group (McLeod syndrome)                                             | 7504  | 1.473769 | 0.014747 | 0.595174 |  |
| 201761_at   | MTHFD2   | methylenetetrahydrofolate dehydrogenase (NADP+                                        | 10797 | 1.176486 | 0.01448  | 0.595174 |  |

|             |          |                                                                    |       |          |          |          |
|-------------|----------|--------------------------------------------------------------------|-------|----------|----------|----------|
|             |          | dependent) 2, methenyltetrahydrofolate cyclohydrolase              |       |          |          |          |
| 202589_at   | TYMS     | thymidylate synthetase                                             | 7298  | 1.284352 | 0.014339 | 0.594132 |
| 203362_s_at | MAD2L1   | MAD2 mitotic arrest deficient-like 1 (yeast)                       | 4085  | 1.12377  | 0.014136 | 0.591776 |
| 204146_at   | RAD51AP1 | RAD51 associated protein 1                                         | 10635 | 1.138009 | 0.013242 | 0.587079 |
| 202814_s_at | HEXIM1   | hexamethylene bis-acetamide inducible 1                            | 10614 | 1.018846 | 0.011855 | 0.587079 |
| 211953_s_at | IPO5     | importin 5                                                         | 3843  | 1.1663   | 0.010926 | 0.587079 |
| 212589_at   | RRAS2    | related RAS viral (r-ras) oncogene homolog 2                       | 22800 | 1.248922 | 0.010896 | 0.587079 |
| 201897_s_at | CKS1B    | CDC28 protein kinase regulatory subunit 1B                         | 1163  | 1.237742 | 0.010699 | 0.587079 |
| 201829_at   | NET1     | neuroepithelial cell transforming 1                                | 10276 | 1.249173 | 0.010403 | 0.58573  |
| 212459_x_at | SUCLG2   | succinate-CoA ligase, GDP-forming, beta subunit                    | 8801  | 1.16554  | 0.009868 | 0.58573  |
| 201930_at   | MCM6     | minichromosome maintenance complex component 6                     | 4175  | 1.046236 | 0.009628 | 0.582356 |
| 209116_x_at | HBB      | hemoglobin, beta                                                   | 3043  | 2.529691 | 0.008816 | 0.568066 |
| 218585_s_at | DTL      | denticleless E3 ubiquitin protein ligase homolog (Drosophila)      | 51514 | 1.376897 | 0.008767 | 0.568066 |
| 206937_at   | SPTA1    | spectrin, alpha, erythrocytic 1 (elliptocytosis 2)                 | 6708  | 1.114075 | 0.008321 | 0.566014 |
| 218883_s_at | MLF1IP   | MLF1 interacting protein                                           | 79682 | 1.136186 | 0.008177 | 0.566014 |
| 215772_x_at | SUCLG2   | succinate-CoA ligase, GDP-forming, beta subunit                    | 8801  | 1.175819 | 0.008054 | 0.566014 |
| 213088_s_at | DNAJC9   | DnaJ (Hsp40) homolog, subfamily C, member 9                        | 23234 | 1.00079  | 0.007957 | 0.565327 |
| 206145_at   | RHAG     | Rh-associated glycoprotein                                         | 6005  | 1.393541 | 0.006392 | 0.547427 |
| 204695_at   | CDC25A   | cell division cycle 25A                                            | 993   | 1.084134 | 0.006299 | 0.547427 |
| 204240_s_at | SMC2     | structural maintenance of chromosomes 2                            | 10592 | 1.294656 | 0.005936 | 0.540991 |
| 202107_s_at | MCM2     | minichromosome maintenance complex component 2                     | 4171  | 1.222252 | 0.005761 | 0.536001 |
| 222204_s_at | RRN3     | RRN3 RNA polymerase I transcription factor homolog (S. cerevisiae) | 54700 | 1.042118 | 0.005729 | 0.536001 |
| 203560_at   | GGH      | gamma-glutamyl hydrolase (conjugase, folylpolyglutamyl hydrolase)  | 8836  | 1.340214 | 0.00547  | 0.526569 |
| 202613_at   | CTPS1    | CTP synthase 1                                                     | 1503  | 1.14984  | 0.005331 | 0.526569 |
| 208955_at   | DUT      | deoxyuridine triphosphatase                                        | 1854  | 1.03421  | 0.005157 | 0.523702 |
| 212282_at   | TMEM97   | transmembrane protein 97                                           | 27346 | 1.011374 | 0.004822 | 0.516178 |
| 219412_at   | RAB38    | RAB38, member RAS oncogene family                                  | 23682 | 1.168702 | 0.004753 | 0.516178 |
| 202503_s_at | KIAA0101 | KIAA0101                                                           | 9768  | 1.309228 | 0.00471  | 0.516178 |
| 204767_s_at | FEN1     | flap structure-specific endonuclease 1                             | 2237  | 1.381621 | 0.004647 | 0.516178 |
| 205394_at   | CHEK1    | checkpoint kinase 1                                                | 1111  | 1.045411 | 0.004442 | 0.516178 |
| 201489_at   | PPIF     | peptidylprolyl isomerase F                                         | 10105 | 1.118185 | 0.004062 | 0.507454 |
| 201890_at   | RRM2     | ribonucleotide reductase M2                                        | 6241  | 2.141038 | 0.00366  | 0.47601  |

|             |          |                                                                                                                            |        |          |          |          |
|-------------|----------|----------------------------------------------------------------------------------------------------------------------------|--------|----------|----------|----------|
| 219306_at   | KIF15    | kinesin family member 15                                                                                                   | 56992  | 1.266139 | 0.003389 | 0.461859 |
| 211144_x_at | TARP     | TCR gamma alternate reading frame protein                                                                                  | 445347 | 1.260002 | 0.003285 | 0.456931 |
| 206834_at   | HBD      | hemoglobin, delta                                                                                                          | 3045   | 2.172202 | 0.003266 | 0.456931 |
| 203476_at   | TPBG     | trophoblast glycoprotein                                                                                                   | 7162   | 1.132385 | 0.002991 | 0.450281 |
| 212281_s_at | TMEM97   | transmembrane protein 97                                                                                                   | 27346  | 1.2802   | 0.002875 | 0.450281 |
| 206067_s_at | WT1      | Wilms tumor 1                                                                                                              | 7490   | 1.247746 | 0.002812 | 0.450281 |
| 208694_at   | PRKDC    | protein kinase, DNA-activated, catalytic polypeptide                                                                       | 5591   | 1.067872 | 0.002544 | 0.438543 |
| 206118_at   | STAT4    | signal transducer and activator of transcription 4                                                                         | 6775   | 1.012186 | 0.002506 | 0.438543 |
| 216920_s_at | TARP     | TCR gamma alternate reading frame protein                                                                                  | 445347 | 1.474096 | 0.002252 | 0.428068 |
| 202949_s_at | FHL2     | four and a half LIM domains 2                                                                                              | 2274   | 1.107316 | 0.002224 | 0.428068 |
| 222201_s_at | CASP8AP2 | caspase 8 associated protein 2                                                                                             | 9994   | 1.054149 | 0.001764 | 0.399532 |
| 204026_s_at | ZWINT    | ZW10 interactor, kinetochore protein                                                                                       | 11130  | 1.720113 | 0.001341 | 0.397293 |
| 209894_at   | LEPR     | leptin receptor                                                                                                            | 3953   | 2.015714 | 0.001141 | 0.380525 |
| 213092_x_at | DNAJC9   | DnaJ (Hsp40) homolog, subfamily C, member 9                                                                                | 23234  | 1.090583 | 0.000823 | 0.310206 |
| 219454_at   | EGFL6    | EGF-like-domain, multiple 6                                                                                                | 25975  | 1.45589  | 0.000616 | 0.258418 |
| 213262_at   | SACS     | spastic ataxia of Charlevoix-Saguenay (sacsin)                                                                             | 26278  | 1.042232 | 0.00059  | 0.252396 |
| 204256_at   | ELOVL6   | ELOVL fatty acid elongase 6                                                                                                | 79071  | 1.448618 | 0.000559 | 0.252191 |
| 215806_x_at | TARP     | TCR gamma alternate reading frame protein                                                                                  | 445347 | 1.534041 | 0.000427 | 0.227751 |
| 209813_x_at | TARP     | TCR gamma alternate reading frame protein                                                                                  | 445347 | 1.665423 | 0.000291 | 0.215629 |
| 201830_s_at | NET1     | neuroepithelial cell transforming 1                                                                                        | 10276  | 1.530152 | 0.000251 | 0.213741 |
| 219615_s_at | KCNK5    | potassium channel, subfamily K, member 5                                                                                   | 8645   | 1.04543  | 0.000225 | 0.21202  |
| 219602_s_at | PIEZO2   | piezo-type mechanosensitive ion channel component 2<br>defective in sister chromatid cohesion 1 homolog (S.<br>cerevisiae) | 63895  | 1.504577 | 7.50E-05 | 0.117928 |
| 219000_s_at | DSCC1    |                                                                                                                            | 79075  | 1.081581 | 4.67E-05 | 0.079813 |
| 205848_at   | GAS2     | growth arrest-specific 2                                                                                                   | 2620   | 2.492596 | 1.11E-05 | 0.02744  |

Table S6a. Differential expression of the 102 core genes in the 7 PV patients with an aggressive phenotype.

| <i>Probeset ID</i> | <i>Symbol (Na32 consensus Mar13)</i> | <i>Gene Title (Na32 consensus Mar13)</i>                                     | <i>GeneID (NCBI Mar)</i> | <i>Log2(FC)</i> | <i>P-Value</i> | <i>Adjusted p-Value</i> |
|--------------------|--------------------------------------|------------------------------------------------------------------------------|--------------------------|-----------------|----------------|-------------------------|
| 209763_at          | CHRD1                                | chordin-like 1                                                               | 91851                    | -1.1760592      | 5.21E-09       | 6.67E-05                |
| 210487_at          | DNTT                                 | deoxynucleotidyltransferase, terminal                                        | 1791                     | -1.91383418     | 6.00E-09       | 6.67E-05                |
| 205933_at          | SETBP1                               | SET binding protein 1                                                        | 26040                    | -1.17729694     | 1.51E-08       | 0.0001121               |
| 201324_at          | EMP1                                 | epithelial membrane protein 1                                                | 2012                     | -1.73634604     | 6.04E-06       | 0.0268018               |
| 209183_s_at        | C10orf10                             | chromosome 10 open reading frame 10                                          | 11067                    | -1.07496461     | 0.000131314    | 0.1390556               |
| 209374_s_at        | IGHM                                 | immunoglobulin heavy constant mu                                             | 3507                     | -1.78677828     | 0.000238354    | 0.2120204               |
| 204430_s_at        | SLC2A5                               | solute carrier family 2 (facilitated glucose/fructose transporter), member 5 | 6518                     | -1.13053427     | 0.000259511    | 0.2137408               |
| 209069_s_at        | H3F3B                                | H3 histone, family 3B (H3.3B)                                                | 3021                     | -1.18660722     | 0.0003182      | 0.221129                |
| 219777_at          | GIMAP6                               | GTPase, IMAP family member 6                                                 | 474344                   | -0.96412142     | 0.000351795    | 0.2277507               |



|             |             |                                                                                                                       |           |             |             |           |
|-------------|-------------|-----------------------------------------------------------------------------------------------------------------------|-----------|-------------|-------------|-----------|
| 204304_s_at | PROM1       | prominin 1                                                                                                            | 8842      | -1.82998841 | 0.000419599 | 0.2277507 |
| 205984_at   | CRHBP       | corticotropin releasing hormone binding protein                                                                       | 1393      | -1.68558627 | 0.000481558 | 0.2391606 |
| 211998_at   | H3F3B       | H3 histone, family 3B (H3.3B)                                                                                         | 3021      | -1.37160868 | 0.00110064  | 0.3765544 |
| 220990_s_at | MIR21       | microRNA 21                                                                                                           | 406991    | -1.1666179  | 0.002023122 | 0.4125343 |
| 201369_s_at | ZFP36L2     | ZFP36 ring finger protein-like 2<br>transducin-like enhancer of split 4 (E(sp1) homolog,<br>Drosophila)               | 678       | -1.42931862 | 0.002728865 | 0.4502813 |
| 204872_at   | TLE4        |                                                                                                                       | 7091      | -1.08661045 | 0.004743456 | 0.5161776 |
| 211597_s_at | HOPX        | HOP homeobox                                                                                                          | 84525     | -1.35699251 | 0.004786898 | 0.5161776 |
| 220377_at   | KIAA0125    | KIAA0125                                                                                                              | 9834      | -1.15784914 | 0.004956965 | 0.5161776 |
| 219304_s_at | PDGFD       | platelet derived growth factor D                                                                                      | 80310     | -0.94059913 | 0.005103212 | 0.5229734 |
| 208960_s_at | KLF6        | Kruppel-like factor 6                                                                                                 | 1316      | -0.94664654 | 0.010221625 | 0.5857297 |
| 203787_at   | SSBP2       | single-stranded DNA binding protein 2                                                                                 | 23635     | -0.79229496 | 0.013428932 | 0.5870789 |
| 204755_x_at | HLF         | hepatic leukemia factor<br>guanine nucleotide binding protein (G protein), alpha<br>inhibiting activity polypeptide 1 | 3131      | -0.61251884 | 0.013936253 | 0.5899467 |
| 209576_at   | GNAI1       |                                                                                                                       | 2770      | -0.63080373 | 0.015529376 | 0.6015332 |
| 204753_s_at | HLF         | hepatic leukemia factor                                                                                               | 3131      | -0.70807109 | 0.021022562 | 0.6316009 |
| 221760_at   | MAN1A1      | mannosidase, alpha, class 1A, member 1                                                                                | 4121      | -1.18371513 | 0.022329984 | 0.6327526 |
| 206478_at   | KIAA0125    | KIAA0125                                                                                                              | 9834      | -0.99597623 | 0.02539777  | 0.6372958 |
| 221556_at   | CDC14B      | cell division cycle 14B                                                                                               | 8555      | -1.26288843 | 0.028047825 | 0.6449399 |
| 214805_at   | EIF4A1      | eukaryotic translation initiation factor 4A1                                                                          | 1973      | -0.67982725 | 0.028070099 | 0.6449399 |
| 220416_at   | ATP8B4      | ATPase, class I, type 8B, member 4                                                                                    | 79895     | -0.73256572 | 0.031829237 | 0.6529304 |
| 208835_s_at | LUC7L3      | LUC7-like 3 (S. cerevisiae)                                                                                           | 51747     | -0.90441159 | 0.042521869 | 0.666611  |
| 204030_s_at | IQCJ-SCHIP1 | IQCJ-SCHIP1 readthrough                                                                                               | 100505385 | -0.57342    | 0.042715691 | 0.666611  |
| 204897_at   | PTGER4      | prostaglandin E receptor 4 (subtype EP4)                                                                              | 5734      | -1.13842542 | 0.058834073 | 0.6927923 |
| 208949_s_at | LGALS3      | lectin, galactoside-binding, soluble, 3                                                                               | 3958      | -0.78834036 | 0.075957894 | 0.7119044 |
| 208961_s_at | KLF6        | Kruppel-like factor 6                                                                                                 | 1316      | -0.79400193 | 0.078101123 | 0.7129149 |
| 209112_at   | CDKN1B      | cyclin-dependent kinase inhibitor 1B (p27, Kip1)                                                                      | 1027      | -0.57998283 | 0.119332543 | 0.7386668 |
| 204563_at   | SELL        | selectin L                                                                                                            | 6402      | -0.97868544 | 0.120606528 | 0.7393127 |
| 214651_s_at | HOXA9       | homeobox A9                                                                                                           | 3205      | -0.56640825 | 0.211940371 | 0.7838234 |
| 208892_s_at | DUSP6       | dual specificity phosphatase 6                                                                                        | 1848      | -0.85096752 | 0.235607663 | 0.7928467 |
| 213524_s_at | G0S2        | G0/G1switch 2                                                                                                         | 50486     | -0.82501945 | 0.239215682 | 0.7948695 |
| 203535_at   | S100A9      | S100 calcium binding protein A9                                                                                       | 6280      | -0.80627992 | 0.254346668 | 0.8015736 |
| 213668_s_at | SOX4        | SRY (sex determining region Y)-box 4                                                                                  | 6659      | -0.82323589 | 0.260556623 | 0.802741  |
| 222044_at   | PCIF1       | PDX1 C-terminal inhibiting factor 1                                                                                   | 63935     | -0.49806168 | 0.282560332 | 0.8109941 |

|             |              |                                                          |           |             |             |           |
|-------------|--------------|----------------------------------------------------------|-----------|-------------|-------------|-----------|
| 213593_s_at | TRA2A        | transformer 2 alpha homolog (Drosophila)                 | 29896     | -0.60971572 | 0.344365936 | 0.8383152 |
| 214041_x_at | RPL37A       | ribosomal protein L37a                                   | 6168      | -0.39653673 | 0.407444152 | 0.8568069 |
| 205442_at   | MFAP3L       | microfibrillar-associated protein 3-like                 | 9848      | -0.51285589 | 0.449796577 | 0.8725199 |
| 214974_x_at | CXCL5        | chemokine (C-X-C motif) ligand 5                         | 6374      | -0.41826978 | 0.551543186 | 0.9009074 |
| 213979_s_at | ---          | ---                                                      |           | -0.35065846 | 0.599848748 | 0.9149341 |
| 214911_s_at | BRD2         | bromodomain containing 2                                 | 6046      | -0.27608523 | 0.611740131 | 0.9174215 |
| 211074_at   | FOLR1        | folate receptor 1 (adult)                                | 2348      | -0.45112625 | 0.632000886 | 0.9246948 |
| 208180_s_at | HIST1H4H     | histone cluster 1, H4h                                   | 8365      | -0.2778544  | 0.639528185 | 0.9257406 |
| 207815_at   | PF4V1        | platelet factor 4 variant 1                              | 5197      | -0.30911148 | 0.651979155 | 0.9286903 |
| 205547_s_at | TAGLN        | transgelin                                               | 6876      | -0.28088743 | 0.708017145 | 0.9439304 |
| 205237_at   | FCN1         | ficolin (collagen/fibrinogen domain containing) 1        | 2219      | -0.32136788 | 0.711156716 | 0.944669  |
|             |              | latent transforming growth factor beta binding           |           |             |             |           |
|             |              | protein 3                                                | 4054      | -0.18060244 | 0.723881126 | 0.9484945 |
| 219922_s_at | LTBP3        |                                                          |           |             |             |           |
| 204141_at   | TUBB2A       | tubulin, beta 2A class IIa                               | 7280      | -0.29534658 | 0.735081772 | 0.9498889 |
| 212952_at   | LOC100507328 | hypothetical LOC100507328                                | 100507328 | -0.22415499 | 0.743954062 | 0.9528039 |
| 209803_s_at | PHLDA2       | pleckstrin homology-like domain, family A, member 2      | 7262      | -0.19751659 | 0.762353226 | 0.9568355 |
| 204834_at   | FGL2         | fibrinogen-like 2                                        | 10875     | -0.20803456 | 0.771018008 | 0.9582727 |
| 213350_at   | RPS11        | ribosomal protein S11                                    | 6205      | -0.21555457 | 0.772923808 | 0.9589509 |
| 211964_at   | COL4A2       | collagen, type IV, alpha 2                               | 1284      | -0.15879898 | 0.78084214  | 0.9613311 |
| 205114_s_at | CCL3L3       | chemokine (C-C motif) ligand 3-like 3                    | 414062    | -0.20519345 | 0.793565216 | 0.9626063 |
| 202310_s_at | COL1A1       | collagen, type I, alpha 1                                | 1277      | -0.22272495 | 0.796823974 | 0.9633788 |
| 217683_at   | HBE1         | hemoglobin, epsilon 1                                    | 3046      | -0.12978731 | 0.806948287 | 0.964919  |
|             |              | EGF containing fibulin-like extracellular matrix protein |           |             |             |           |
|             |              | 1                                                        | 2202      | -0.17500966 | 0.813572867 | 0.9663992 |
| 201842_s_at | EFEMP1       |                                                          |           |             |             |           |
| 201631_s_at | IER3         | immediate early response 3                               | 8870      | -0.12662907 | 0.836432308 | 0.9684535 |
| 201798_s_at | MYOF         | myoferlin                                                | 26509     | -0.12987194 | 0.839316831 | 0.9692311 |
| 1405_i_at   | CCL5         | chemokine (C-C motif) ligand 5                           | 6352      | -0.16353025 | 0.840439597 | 0.9695199 |
| 201058_s_at | MYL9         | myosin, light chain 9, regulatory                        | 10398     | -0.11665284 | 0.854796069 | 0.9731863 |
| 215076_s_at | COL3A1       | collagen, type III, alpha 1                              | 1281      | -0.11954993 | 0.877410108 | 0.9785103 |
| 202403_s_at | COL1A2       | collagen, type I, alpha 2                                | 1278      | -0.11102553 | 0.891268391 | 0.9806744 |
| 210809_s_at | POSTN        | periostin, osteoblast specific factor                    | 10631     | -0.1111146  | 0.912911705 | 0.9851423 |
| 212531_at   | LCN2         | lipocalin 2                                              | 3934      | -0.02914052 | 0.962852347 | 0.9923439 |
|             |              | apolipoprotein B mRNA editing enzyme, catalytic          |           |             |             |           |
|             |              | polypeptide-like 3A                                      | 200315    | -0.02534114 | 0.967184016 | 0.9940037 |

|             |          |                                                                                                                                                           |       |             |             |           |
|-------------|----------|-----------------------------------------------------------------------------------------------------------------------------------------------------------|-------|-------------|-------------|-----------|
| 211980_at   | COL4A1   | collagen, type IV, alpha 1                                                                                                                                | 1282  | -0.01874739 | 0.977820792 | 0.9959916 |
| 201438_at   | COL6A3   | collagen, type VI, alpha 3                                                                                                                                | 1293  | 0.009703779 | 0.9863171   | 0.9970689 |
| 74694_s_at  | RABEP2   | rabaptin, RAB GTPase binding effector protein 2                                                                                                           | 79874 | 0.011843173 | 0.981583585 | 0.9961445 |
| 211719_x_at | FN1      | fibronectin 1                                                                                                                                             | 2335  | 0.037210894 | 0.973177363 | 0.9950096 |
| 202404_s_at | COL1A2   | collagen, type I, alpha 2                                                                                                                                 | 1278  | 0.034227062 | 0.972988883 | 0.9950096 |
| 204655_at   | CCL5     | chemokine (C-C motif) ligand 5                                                                                                                            | 6352  | 0.038628831 | 0.965309914 | 0.9935003 |
| 216442_x_at | FN1      | fibronectin 1                                                                                                                                             | 2335  | 0.054191701 | 0.95355946  | 0.9912349 |
| 210495_x_at | FN1      | fibronectin 1                                                                                                                                             | 2335  | 0.058226728 | 0.951550365 | 0.9910374 |
| 212464_s_at | FN1      | fibronectin 1                                                                                                                                             | 2335  | 0.081392657 | 0.933688332 | 0.988994  |
| 211161_s_at | COL3A1   | collagen, type III, alpha 1                                                                                                                               | 1281  | 0.056146834 | 0.930500411 | 0.9881951 |
| 212667_at   | SPARC    | secreted protein, acidic, cysteine-rich (osteonectin)<br>serpin peptidase inhibitor, clade E (nexin,<br>plasminogen activator inhibitor type 1), member 1 | 6678  | 0.058151732 | 0.926810399 | 0.9875364 |
| 202627_s_at | SERPINE1 | plasminogen activator inhibitor type 1), member 1                                                                                                         | 5054  | 0.130825837 | 0.842575178 | 0.9702264 |
| 213757_at   | EIF5A    | eukaryotic translation initiation factor 5A                                                                                                               | 1984  | 0.138314467 | 0.836269539 | 0.9684535 |
| 202600_s_at | NRIP1    | nuclear receptor interacting protein 1                                                                                                                    | 8204  | 0.146667606 | 0.81125437  | 0.9660204 |
| 202237_at   | NNMT     | nicotinamide N-methyltransferase                                                                                                                          | 4837  | 0.357137196 | 0.643404225 | 0.9262055 |
| 201666_at   | TIMP1    | TIMP metalloproteinase inhibitor 1                                                                                                                        | 7076  | 0.178832267 | 0.632222051 | 0.9248966 |
| 204018_x_at | HBA1     | hemoglobin, alpha 1                                                                                                                                       | 3039  | 0.503353692 | 0.544752592 | 0.8986814 |
| 200999_s_at | CKAP4    | cytoskeleton-associated protein 4                                                                                                                         | 10970 | 0.335798499 | 0.541539556 | 0.8965721 |
| 204622_x_at | NR4A2    | nuclear receptor subfamily 4, group A, member 2                                                                                                           | 4929  | 0.334447219 | 0.497538974 | 0.8848345 |
| 203394_s_at | HES1     | hairy and enhancer of split 1, (Drosophila)                                                                                                               | 3280  | 0.443814733 | 0.487186309 | 0.8828267 |
| 206157_at   | PTX3     | pentraxin 3, long                                                                                                                                         | 5806  | 0.494269798 | 0.426649316 | 0.8638802 |
| 205382_s_at | CFD      | complement factor D (adipsin)                                                                                                                             | 1675  | 0.493713983 | 0.395763648 | 0.8528093 |
| 217414_x_at | HBA1     | hemoglobin, alpha 1                                                                                                                                       | 3039  | 0.792680859 | 0.377115905 | 0.8469171 |
| 211745_x_at | HBA1     | hemoglobin, alpha 1                                                                                                                                       | 3039  | 0.872403284 | 0.371311295 | 0.8441546 |
| 214414_x_at | HBA1     | hemoglobin, alpha 1                                                                                                                                       | 3039  | 0.997898457 | 0.369791698 | 0.8441546 |
| 211699_x_at | HBA1     | hemoglobin, alpha 1                                                                                                                                       | 3039  | 0.740693292 | 0.368184583 | 0.844099  |
| 209458_x_at | HBA1     | hemoglobin, alpha 1                                                                                                                                       | 3039  | 0.850433299 | 0.356237193 | 0.8404624 |
| 212077_at   | CALD1    | caldesmon 1                                                                                                                                               | 800   | 0.588320285 | 0.348578502 | 0.8401911 |
| 216248_s_at | NR4A2    | nuclear receptor subfamily 4, group A, member 2                                                                                                           | 4929  | 0.570789503 | 0.342393968 | 0.8375489 |
| 219403_s_at | HPSE     | heparanase                                                                                                                                                | 10855 | 0.691038194 | 0.269546864 | 0.8062958 |
| 201110_s_at | THBS1    | thrombospondin 1                                                                                                                                          | 7057  | 0.670401219 | 0.251133297 | 0.8008466 |
| 203395_s_at | HES1     | hairy and enhancer of split 1, (Drosophila)                                                                                                               | 3280  | 0.85070808  | 0.193692    | 0.7743035 |
| 200629_at   | WARS     | tryptophanyl-tRNA synthetase                                                                                                                              | 7453  | 0.666045516 | 0.186006457 | 0.7721508 |

|             |         |                                                                                  |       |             |             |           |
|-------------|---------|----------------------------------------------------------------------------------|-------|-------------|-------------|-----------|
| 201669_s_at | MARCKS  | myristoylated alanine-rich protein kinase C substrate                            | 4082  | 0.759568605 | 0.132720593 | 0.7472316 |
| 201195_s_at | SLC7A5  | solute carrier family 7 (amino acid transporter light chain, L system), member 5 | 8140  | 0.824741527 | 0.116329142 | 0.7382591 |
| 204419_x_at | HGB1    | hemoglobin, gamma A                                                              | 3047  | 1.666375122 | 0.09142905  | 0.723603  |
| 204848_x_at | HGB1    | hemoglobin, gamma A                                                              | 3047  | 1.565419124 | 0.086123226 | 0.7221941 |
| 219410_at   | TMEM45A | transmembrane protein 45A                                                        | 55076 | 0.991276475 | 0.082130669 | 0.7221941 |
| 217388_s_at | KYNU    | kynureninase                                                                     | 8942  | 1.468313974 | 0.069766007 | 0.7032894 |
| 209290_s_at | NFIB    | nuclear factor I/B                                                               | 4781  | 1.089323355 | 0.04758335  | 0.6754948 |
| 202870_s_at | CDC20   | cell division cycle 20                                                           | 991   | 1.339488946 | 0.036576735 | 0.658786  |
| 217232_x_at | HBB     | hemoglobin, beta                                                                 | 3043  | 1.819045943 | 0.03458682  | 0.658786  |
| 213515_x_at | HGB1    | hemoglobin, gamma A                                                              | 3047  | 2.417286959 | 0.029878597 | 0.651733  |
| 209773_s_at | RRM2    | ribonucleotide reductase M2                                                      | 6241  | 1.767337745 | 0.021613828 | 0.6316009 |
| 211696_x_at | HBB     | hemoglobin, beta                                                                 | 3043  | 1.960802898 | 0.020715624 | 0.6316009 |
| 206698_at   | XK      | X-linked Kx blood group (McLeod syndrome)                                        | 7504  | 1.473769082 | 0.01474655  | 0.5951742 |
| 212589_at   | RRAS2   | related RAS viral (r-ras) oncogene homolog 2                                     | 22800 | 1.248921748 | 0.010895573 | 0.5870789 |
| 209116_x_at | HBB     | hemoglobin, beta                                                                 | 3043  | 2.529691269 | 0.008815809 | 0.5680662 |
| 215772_x_at | SUCLG2  | succinate-CoA ligase, GDP-forming, beta subunit                                  | 8801  | 1.175819449 | 0.008054348 | 0.5660139 |
| 201890_at   | RRM2    | ribonucleotide reductase M2                                                      | 6241  | 2.141037934 | 0.003660296 | 0.4760098 |
| 209894_at   | LEPR    | leptin receptor                                                                  | 3953  | 2.015713837 | 0.00114085  | 0.3805249 |
| 219602_s_at | PIEZO2  | piezo-type mechanosensitive ion channel component 2                              | 63895 | 1.504577032 | 7.50E-05    | 0.1179278 |
| 205848_at   | GAS2    | growth arrest-specific 2                                                         | 2620  | 2.492595762 | 1.11E-05    | 0.0274403 |

Table S6b. Differential expression of the 102 core genes by the 12 PV patients with an indolent phenotype.

| <b>Probeset ID</b> | <b>Symbol (Na32 consensus Mar13)</b> | <b>Gene Title (Na32 consensus Mar13)</b>                            | <b>GeneID (consensus1 Mar-13)</b> | <b>Log2(FC)</b> | <b>P-Value</b> | <b>Adjusted p-Value</b> |
|--------------------|--------------------------------------|---------------------------------------------------------------------|-----------------------------------|-----------------|----------------|-------------------------|
| 208949_s_at        | LGALS3                               | lectin, galactoside-binding, soluble, 3                             | 3958                              | -2.46115508     | 4.71E-07       | 0.0008705               |
| 201666_at          | TIMP1                                | TIMP metalloproteinase inhibitor 1                                  | 7076                              | -1.63941887     | 2.35E-05       | 0.0042807               |
| 201058_s_at        | MYL9                                 | myosin, light chain 9, regulatory                                   | 10398                             | -2.74636917     | 3.07E-05       | 0.0046717               |
| 207815_at          | PF4V1                                | platelet factor 4 variant 1                                         | 5197                              | -2.82238801     | 5.35E-05       | 0.0058277               |
| 1405_i_at          | CCL5                                 | chemokine (C-C motif) ligand 5                                      | 6352                              | -3.32636522     | 5.85E-05       | 0.0060359               |
| 213524_s_at        | G0S2                                 | G0/G1switch 2                                                       | 50486                             | -2.65614662     | 0.0001262      | 0.007998                |
| 201631_s_at        | IER3                                 | immediate early response 3                                          | 8870                              | -2.29780898     | 0.000169       | 0.009257                |
| 204655_at          | CCL5                                 | chemokine (C-C motif) ligand 5                                      | 6352                              | -3.23424391     | 0.0002336      | 0.0105336               |
| 203535_at          | S100A9                               | S100 calcium binding protein A9                                     | 6280                              | -2.4351969      | 0.0003703      | 0.0133722               |
| 212077_at          | CALD1                                | caldesmon 1                                                         | 800                               | -2.04255108     | 0.0006877      | 0.0178246               |
| 210873_x_at        | APOBEC3A                             | apolipoprotein B mRNA editing enzyme, catalytic polypeptide-like 3A | 200315                            | -1.76920321     | 0.0023357      | 0.032102                |
| 212531_at          | LCN2                                 | lipocalin 2                                                         | 3934                              | -1.74944593     | 0.0029164      | 0.0363335               |
| 205114_s_at        | CCL3L3                               | chemokine (C-C motif) ligand 3-like 3                               | 414062                            | -2.11268057     | 0.0038941      | 0.0419976               |
| 208180_s_at        | HIST1H4H                             | histone cluster 1, H4h                                              | 8365                              | -1.58614736     | 0.0040832      | 0.0431848               |
| 205237_at          | FCN1                                 | ficolin (collagen/fibrinogen domain containing) 1                   | 2219                              | -2.31794481     | 0.0041427      | 0.0434495               |
| 214414_x_at        | HBA1                                 | hemoglobin, alpha 1                                                 | 3039                              | -2.92561932     | 0.0044286      | 0.0449487               |
| 209803_s_at        | PHLDA2                               | pleckstrin homology-like domain, family A, member 2                 | 7262                              | -1.71861099     | 0.0046599      | 0.0462831               |
| 201438_at          | COL6A3                               | collagen, type VI, alpha 3                                          | 1293                              | -1.45596175     | 0.0055357      | 0.0504893               |
| 205547_s_at        | TAGLN                                | transgelin                                                          | 6876                              | -1.89686803     | 0.0062053      | 0.0538116               |
| 211074_at          | FOLR1                                | folate receptor 1 (adult)                                           | 2348                              | -2.33500441     | 0.0071061      | 0.0579213               |
| 221556_at          | CDC14B                               | cell division cycle 14B                                             | 8555                              | -1.35462909     | 0.0072261      | 0.0582223               |
| 211745_x_at        | HBA1                                 | hemoglobin, alpha 1                                                 | 3039                              | -2.39194906     | 0.0073721      | 0.0586827               |
| 204141_at          | TUBB2A                               | tubulin, beta 2A class IIa                                          | 7280                              | -2.13929618     | 0.0077476      | 0.0602366               |
| 204018_x_at        | HBA1                                 | hemoglobin, alpha 1                                                 | 3039                              | -1.9801303      | 0.0092138      | 0.0661068               |
| 201798_s_at        | MYOF                                 | myoferlin                                                           | 26509                             | -1.51465891     | 0.009894       | 0.0682173               |
| 209458_x_at        | HBA1                                 | hemoglobin, alpha 1                                                 | 3039                              | -2.13257405     | 0.0108016      | 0.071832                |

|             |          |                                                                                               |       |             |           |           |
|-------------|----------|-----------------------------------------------------------------------------------------------|-------|-------------|-----------|-----------|
| 217414_x_at | HBA1     | hemoglobin, alpha 1                                                                           | 3039  | -2.0496731  | 0.0117787 | 0.0752125 |
| 211964_at   | COL4A2   | collagen, type IV, alpha 2                                                                    | 1284  | -1.30406638 | 0.0122956 | 0.0767626 |
| 205442_at   | MFAP3L   | microfibrillar-associated protein 3-like                                                      | 9848  | -1.52050559 | 0.0134371 | 0.0808545 |
| 214974_x_at | CXCL5    | chemokine (C-X-C motif) ligand 5                                                              | 6374  | -1.55942048 | 0.0144079 | 0.083963  |
| 202310_s_at | COL1A1   | collagen, type I, alpha 1                                                                     | 1277  | -1.87618778 | 0.0168309 | 0.0918907 |
| 219403_s_at | HPSE     | heparanase                                                                                    | 10855 | -1.31934206 | 0.0184966 | 0.0968056 |
| 212667_at   | SPARC    | secreted protein, acidic, cysteine-rich (osteonectin)                                         | 6678  | -1.34731184 | 0.0188123 | 0.0976538 |
| 200999_s_at | CKAP4    | cytoskeleton-associated protein 4                                                             | 10970 | -1.14939507 | 0.0204052 | 0.1017426 |
| 204834_at   | FGL2     | fibrinogen-like 2                                                                             | 10875 | -1.46819648 | 0.0227746 | 0.1072555 |
| 216442_x_at | FN1      | fibronectin 1                                                                                 | 2335  | -1.90725545 | 0.023141  | 0.1081658 |
| 201842_s_at | EFEMP1   | EGF containing fibulin-like extracellular matrix protein 1                                    | 2202  | -1.50062086 | 0.0247947 | 0.1121383 |
| 212464_s_at | FN1      | fibronectin 1                                                                                 | 2335  | -1.96352838 | 0.0258307 | 0.1143867 |
| 211719_x_at | FN1      | fibronectin 1                                                                                 | 2335  | -2.20581999 | 0.0267964 | 0.1164775 |
| 210495_x_at | FN1      | fibronectin 1                                                                                 | 2335  | -1.90768224 | 0.026965  | 0.1168453 |
| 216248_s_at | NR4A2    | nuclear receptor subfamily 4, group A, member 2                                               | 4929  | -1.17498747 | 0.0282382 | 0.1197257 |
| 211699_x_at | HBA1     | hemoglobin, alpha 1                                                                           | 3039  | -1.60001534 | 0.0291616 | 0.1216234 |
| 217683_at   | HBE1     | hemoglobin, epsilon 1                                                                         | 3046  | -1.01631722 | 0.0327501 | 0.1295902 |
| 202627_s_at | SERPINE1 | serpin peptidase inhibitor, clade E (nexin, plasminogen activator inhibitor type 1), member 1 | 5054  | -1.241552   | 0.0352569 | 0.1349566 |
| 203394_s_at | HES1     | hairy and enhancer of split 1, (Drosophila)                                                   | 3280  | -1.1913737  | 0.0362517 | 0.1371457 |
| 211980_at   | COL4A1   | collagen, type IV, alpha 1                                                                    | 1282  | -1.25680354 | 0.0372348 | 0.139094  |
| 204622_x_at | NR4A2    | nuclear receptor subfamily 4, group A, member 2                                               | 4929  | -0.91072954 | 0.037958  | 0.1405444 |
| 215076_s_at | COL3A1   | collagen, type III, alpha 1                                                                   | 1281  | -1.43307205 | 0.0385845 | 0.1417739 |
| 202403_s_at | COL1A2   | collagen, type I, alpha 2                                                                     | 1278  | -1.44054881 | 0.0465026 | 0.1564484 |
| 202404_s_at | COL1A2   | collagen, type I, alpha 2                                                                     | 1278  | -1.71166248 | 0.0565387 | 0.1733135 |
| 210809_s_at | POSTN    | periostin, osteoblast specific factor                                                         | 10631 | -1.70047318 | 0.0592192 | 0.1779858 |
| 200629_at   | WARS     | tryptophanyl-tRNA synthetase                                                                  | 7453  | -0.81407303 | 0.0632647 | 0.1842488 |
| 205382_s_at | CFD      | complement factor D (adipsin)                                                                 | 1675  | -0.93430533 | 0.0674121 | 0.1911642 |
| 211161_s_at | COL3A1   | collagen, type III, alpha 1                                                                   | 1281  | -0.97790719 | 0.0849171 | 0.216434  |
| 202237_at   | NNMT     | nicotinamide N-methyltransferase                                                              | 4837  | -1.16905976 | 0.0849883 | 0.216541  |
| 206157_at   | PTX3     | pentraxin 3, long                                                                             | 5806  | -0.8886965  | 0.1017166 | 0.2401657 |
| 222044_at   | PCIF1    | PDX1 C-terminal inhibiting factor 1                                                           | 63935 | -0.59010446 | 0.1405898 | 0.2902372 |
| 203395_s_at | HES1     | hairy and enhancer of split 1, (Drosophila)                                                   | 3280  | -0.82856755 | 0.1406431 | 0.2902934 |

|             |              |                                                                                  |           |             |           |           |
|-------------|--------------|----------------------------------------------------------------------------------|-----------|-------------|-----------|-----------|
| 214041_x_at | RPL37A       | ribosomal protein L37a                                                           | 6168      | -0.49636026 | 0.2288142 | 0.3892891 |
| 213668_s_at | SOX4         | SRY (sex determining region Y)-box 4                                             | 6659      | -0.74126503 | 0.2366512 | 0.397241  |
| 214911_s_at | BRD2         | bromodomain containing 2                                                         | 6046      | -0.55589849 | 0.237402  | 0.3980366 |
| 213515_x_at | HBG1         | hemoglobin, gamma A                                                              | 3047      | -1.06377    | 0.2466641 | 0.407885  |
| 204419_x_at | HBG1         | hemoglobin, gamma A                                                              | 3047      | -0.908371   | 0.2734668 | 0.4340414 |
| 208892_s_at | DUSP6        | dual specificity phosphatase 6                                                   | 1848      | -0.62624686 | 0.3054404 | 0.4659019 |
| 201669_s_at | MARCKS       | myristoylated alanine-rich protein kinase C substrate                            | 4082      | -0.4343098  | 0.308411  | 0.4689854 |
| 201324_at   | EMP1         | epithelial membrane protein 1                                                    | 2012      | -0.26518451 | 0.3157697 | 0.476429  |
| 204848_x_at | HBG1         | hemoglobin, gamma A                                                              | 3047      | -0.73774161 | 0.3338994 | 0.4939304 |
| 213350_at   | RPS11        | ribosomal protein S11                                                            | 6205      | -0.59851213 | 0.3525386 | 0.5113994 |
| 213593_s_at | TRA2A        | transformer 2 alpha homolog (Drosophila)                                         | 29896     | -0.51180921 | 0.3529863 | 0.5117818 |
| 209374_s_at | IGHM         | immunoglobulin heavy constant mu                                                 | 3507      | -0.31785029 | 0.3800608 | 0.5367239 |
| 213979_s_at | ---          | ---                                                                              | ---       | -0.40184672 | 0.4828663 | 0.6262323 |
| 201110_s_at | THBS1        | thrombospondin 1                                                                 | 7057      | -0.32862948 | 0.50663   | 0.645676  |
| 212952_at   | LOC100507328 | hypothetical LOC100507328                                                        | 100507328 | -0.3705879  | 0.5288342 | 0.6639313 |
| 213757_at   | EIF5A        | eukaryotic translation initiation factor 5A                                      | 1984      | -0.30685777 | 0.5926473 | 0.7155269 |
| 201195_s_at | SLC7A5       | solute carrier family 7 (amino acid transporter light chain, L system), member 5 | 8140      | -0.21795555 | 0.6192996 | 0.7368622 |
| 217232_x_at | HBB          | hemoglobin, beta                                                                 | 3043      | -0.28037802 | 0.690155  | 0.7905057 |
| 206698_at   | XK           | X-linked Kx blood group (McLeod syndrome)                                        | 7504      | -0.15354275 | 0.7519213 | 0.8333529 |
| 209116_x_at | HBB          | hemoglobin, beta                                                                 | 3043      | -0.22011194 | 0.7745612 | 0.8490507 |
| 208960_s_at | KLF6         | Kruppel-like factor 6                                                            | 1316      | -0.0669692  | 0.8198308 | 0.8804886 |
| 211696_x_at | HBB          | hemoglobin, beta                                                                 | 3043      | -0.11853666 | 0.8626478 | 0.9090874 |
| 212589_at   | RRAS2        | related RAS viral (r-ras) oncogene homolog 2                                     | 22800     | -0.03039679 | 0.9381282 | 0.9597619 |
| 74694_s_at  | RABEP2       | rabaptin, RAB GTPase binding effector protein 2                                  | 79874     | -0.02974959 | 0.9459227 | 0.9655037 |
| 205933_at   | SETBP1       | SET binding protein 1                                                            | 26040     | -0.00557713 | 0.9639004 | 0.976948  |
| 219410_at   | TMEM45A      | transmembrane protein 45A                                                        | 55076     | -0.01300971 | 0.9780245 | 0.9864563 |
| 209183_s_at | C10orf10     | chromosome 10 open reading frame 10                                              | 11067     | 0.053999237 | 0.7924264 | 0.8612892 |
| 217388_s_at | KYNU         | kynureninase                                                                     | 8942      | 0.220147884 | 0.7422951 | 0.8265151 |
| 204872_at   | TLE4         | transducin-like enhancer of split 4 (E(sp1) homolog, Drosophila)                 | 7091      | 0.119923227 | 0.6919854 | 0.7913794 |
| 209290_s_at | NFIB         | nuclear factor I/B                                                               | 4781      | 0.179441546 | 0.6912758 | 0.7909339 |
| 209069_s_at | H3F3B        | H3 histone, family 3B (H3.3B)                                                    | 3021      | 0.099846114 | 0.6841093 | 0.7862131 |
| 209763_at   | CHRD1        | chordin-like 1                                                                   | 91851     | 0.050254159 | 0.6660676 | 0.7731502 |

|             |          |                                                                                         |        |             |           |           |
|-------------|----------|-----------------------------------------------------------------------------------------|--------|-------------|-----------|-----------|
| 208961_s_at | KLF6     | Kruppel-like factor 6                                                                   | 1316   | 0.203610948 | 0.5862653 | 0.7103285 |
| 219922_s_at | LTBP3    | latent transforming growth factor beta binding protein 3                                | 4054   | 0.265731289 | 0.5441646 | 0.676381  |
| 210487_at   | DNTT     | deoxynucleotidyltransferase, terminal                                                   | 1791   | 0.159844182 | 0.4049727 | 0.5588841 |
| 202600_s_at | NRIP1    | nuclear receptor interacting protein 1                                                  | 8204   | 0.470263901 | 0.374044  | 0.5310937 |
| 211998_at   | H3F3B    | H3 histone, family 3B (H3.3B)                                                           | 3021   | 0.303014616 | 0.3488911 | 0.5083632 |
| 219304_s_at | PDGFD    | platelet derived growth factor D                                                        | 80310  | 0.277596346 | 0.298783  | 0.4593071 |
| 204897_at   | PTGER4   | prostaglandin E receptor 4 (subtype EP4)                                                | 5734   | 0.607994686 | 0.2274529 | 0.3875045 |
| 202870_s_at | CDC20    | cell division cycle 20                                                                  | 991    | 0.762009765 | 0.1538922 | 0.3060777 |
| 220990_s_at | MIR21    | microRNA 21                                                                             | 406991 | 0.435464726 | 0.1444477 | 0.2949163 |
| 220377_at   | KIAA0125 | KIAA0125                                                                                | 9834   | 0.487203922 | 0.1414233 | 0.2913494 |
| 215772_x_at | SUCLG2   | succinate-CoA ligase, GDP-forming, beta subunit                                         | 8801   | 0.540170913 | 0.1340248 | 0.2820253 |
| 204563_at   | SELL     | selectin L                                                                              | 6402   | 0.910468161 | 0.0926084 | 0.2277875 |
| 211597_s_at | HOPX     | HOP homeobox                                                                            | 84525  | 0.686080974 | 0.0787633 | 0.2073318 |
| 205984_at   | CRHBP    | corticotropin releasing hormone binding protein                                         | 1393   | 0.67956433  | 0.0697279 | 0.1948001 |
| 208835_s_at | LUC7L3   | LUC7-like 3 ( <i>S. cerevisiae</i> )                                                    | 51747  | 0.690777363 | 0.0676605 | 0.1915926 |
| 221760_at   | MAN1A1   | mannosidase, alpha, class 1A, member 1                                                  | 4121   | 0.824262339 | 0.0582629 | 0.1763029 |
| 201369_s_at | ZFP36L2  | ZFP36 ring finger protein-like 2                                                        | 678    | 0.748937338 | 0.0520224 | 0.1657888 |
| 209773_s_at | RRM2     | ribonucleotide reductase M2                                                             | 6241   | 1.272153164 | 0.0495607 | 0.1616025 |
| 204304_s_at | PROM1    | prominin 1                                                                              | 8842   | 0.925426909 | 0.0237482 | 0.1095213 |
| 209894_at   | LEPR     | leptin receptor                                                                         | 3953   | 1.184929139 | 0.0181485 | 0.0959498 |
| 203787_at   | SSBP2    | single-stranded DNA binding protein 2                                                   | 23635  | 0.75811153  | 0.0063777 | 0.0544303 |
| 201890_at   | RRM2     | ribonucleotide reductase M2                                                             | 6241   | 1.743455889 | 0.0052954 | 0.0493966 |
| 219602_s_at | PIEZO2   | piezo-type mechanosensitive ion channel component 2                                     | 63895  | 0.949014365 | 0.0017907 | 0.0285001 |
| 204755_x_at | HLF      | hepatic leukemia factor                                                                 | 3131   | 0.692860181 | 0.0017806 | 0.0285001 |
| 204753_s_at | HLF      | hepatic leukemia factor                                                                 | 3131   | 0.867266686 | 0.0016555 | 0.0275765 |
| 209576_at   | GNAI1    | guanine nucleotide binding protein (G protein), alpha inhibiting activity polypeptide 1 | 2770   | 0.736228442 | 0.0015849 | 0.0269254 |
| 214805_at   | EIF4A1   | eukaryotic translation initiation factor 4A1                                            | 1973   | 0.894052441 | 0.001431  | 0.025337  |
| 209112_at   | CDKN1B   | cyclin-dependent kinase inhibitor 1B (p27, Kip1)                                        | 1027   | 1.181992974 | 0.0007491 | 0.0186168 |
| 214651_s_at | HOXA9    | homeobox A9                                                                             | 3205   | 1.466348689 | 0.0006873 | 0.0178246 |
| 219777_at   | GIMAP6   | GTPase, IMAP family member 6                                                            | 474344 | 0.787293816 | 0.000565  | 0.016422  |
| 204430_s_at | SLC2A5   | solute carrier family 2 (facilitated glucose/fructose transporter), member 5            | 6518   | 0.916940276 | 0.0004539 | 0.0149986 |



|             |             |                                    |           |             |          |           |
|-------------|-------------|------------------------------------|-----------|-------------|----------|-----------|
| 206478_at   | KIAA0125    | KIAA0125                           | 9834      | 1.699585816 | 7.39E-05 | 0.0063689 |
| 220416_at   | ATP8B4      | ATPase, class I, type 8B, member 4 | 79895     | 1.319886477 | 6.56E-05 | 0.0061373 |
| 205848_at   | GAS2        | growth arrest-specific 2           | 2620      | 1.882945739 | 5.69E-05 | 0.0059648 |
| 204030_s_at | IQCJ-SCHIP1 | IQCJ-SCHIP1 readthrough            | 100505385 | 1.123786747 | 5.04E-05 | 0.0057459 |

**Table S7. Primers used to construct plasmids for standard curve generation in the Q-RT-PCR 10 gene assay.**

| <b>Gene Symbol:</b> | <b>region of cDNA:</b> | <b>5' primer (5'-3'):</b>          | <b>3' primer (5'-3'):</b>          | <b>insert size (bp):</b> |
|---------------------|------------------------|------------------------------------|------------------------------------|--------------------------|
| CDKN1A              | full length            | TGCCGAAGTCAGTTCCTTGT               | TGCCGAAGTCAGTTCCTTGT               | 634                      |
| CTSA                | 3'                     | CCCAAGCTTCAGCTGCTTCCACC<br>TACCTC  | CCCAAGCTTGGAGCTGGTTGCTG<br>TGGTC   | 478                      |
| IFI30               | full length            | CCCAAGCTTGCAGTCGCCACACC<br>TTTG    | CCCAAGCTTCACTCGCCTTCCAT<br>GAGC    | 840                      |
| MYL9                | full length            | CACCCACCAGAAGCCAAG                 | CTGGGAAGTGGGACCCTAAC               | 506                      |
| PCNA                | full length            | CCCAAGCTTGCTCTTCCCTTACGC<br>AAGTCT | CCCAAGCTTGCTGGCATCTTAGA<br>AGCAGTT | 1000                     |
| SMC4                | 3'                     | TGAGGACAAAGCAGCAGAGGTCG            | GAGTTCGGCGTCCCCTCCCA               | 589                      |
| SON                 | 3'                     | GCTCAGGAAAGGATTGATGC               | CTGTGGCTTTAGCATGCTTCT              | 588                      |
| TIA1                | 3'                     | AGTGGCTTGGTGGGAAGACAA              | CACTCCCTGTAGCCTCAAGC               | 536                      |
| TSN                 | full length            | CCCAAGCTTGCTACACTGGCTGA<br>TTGTTG  | CCCAAGCTTGCAGTGTTTAGC<br>AACTGA    | 845                      |
| CTTN                | full length            | n/a                                | n/a                                | 3000                     |
| ACTB                | 5'                     | GCACAGAGCCTCGCCTTT                 | CAGGCAGCTCGTAGCTCTTC               | 787                      |

**Table S8. Primer/probe sets for the Q-RT-PCR 10 gene assay.**

| <b>ABI GEX Assay ID</b> | <b>Gene Symbol</b> | <b>Gene Name</b>                                      | <b>GEX Target Exon Boundaries</b> |
|-------------------------|--------------------|-------------------------------------------------------|-----------------------------------|
| Hs00952870_g1           | PCNA               | proliferating cell nuclear antigen                    | 4-5                               |
| Hs00908857_g1           | IFI30              | interferon, gamma-inducible protein 30                | 6-7                               |
| Hs00172824_m1           | TSN                | translin                                              | 5-6                               |
| Hs01563956_g1           | CTSA               | cathepsin A                                           | 13-14                             |
| Hs00909708_g1           | SMC4               | structural maintenance of chromosomes 4               | 21-22                             |
| Hs00355782_m1           | CDKN1A             | cyclin-dependent kinase inhibitor 1A (p21, Cip1)      | 2-3                               |
| Hs01124227_m1           | CTTN               | cortactin                                             | 17-18                             |
| Hs01066142_g1           | SON                | SON DNA binding protein                               | 11-12                             |
| Hs01046922_m1           | TIA1               | TIA1 cytotoxic granule-associated RNA binding protein | 10-11                             |
| Hs00382913_m1           | MYL9               | myosin, light chain 9, regulatory                     | 2-3                               |

Table S9a: Inter-assay comparisons of different cDNA preparations made from the same RNA sample.

| A | Patient # | Blood Sample Date | Ten gene score |
|---|-----------|-------------------|----------------|
|   | 1         | 9/8/2011          | 5              |
|   |           |                   | 5              |
|   | 2         | 11/25/2008        | 2              |
|   |           |                   | 2              |
|   | 3         | 11/25/2003        | 5              |
|   |           |                   | 5              |
|   | 4         | 8/9/2011          | 3              |
|   |           |                   | 3              |
|   | 5         | 3/6/2012          | 3              |
|   |           |                   | 4              |
|   | 6         | 7/3/2012          | 5              |
|   |           |                   | 6              |
|   | 7         | 9/26/2006         | 5              |
|   |           |                   | 5              |
|   | 8         | 6/12/2012         | 4              |
|   |           |                   | 4              |

Table S9b: Inter-assay comparisons of cDNA preparations from two different blood samples from the same patient during a 6 month period during which there was no change in patient clinical phenotype.

| B | Patient # | Blood Sample Date | Ten gene score: |
|---|-----------|-------------------|-----------------|
|   | 9         | 6/20/2012         | 5               |
|   |           | 6/22/2012         | 6               |
|   | 10        | 4/17/2012         | 4               |
|   |           | 10/2/2012         | 4               |
|   | 11        | 6/14/2012         | 3               |
|   |           | 10/9/2012         | 2               |

Table S10. Clinical features by gender of the 8 patient training set for the 10 gene assay.

|                                                                                       | Men (2)                             | Women (6)*                                                           |
|---------------------------------------------------------------------------------------|-------------------------------------|----------------------------------------------------------------------|
| Median Age<br>(years; range)                                                          | 72                                  | 71 <sup>&amp;</sup><br>(46-84)                                       |
| Median Disease Duration (years; range)                                                | 13<br>(1-25)                        | 11.5 <sup>&amp;</sup><br>(4-18)                                      |
| Median JAK2 V617F Neutrophil Allele Burden<br>(%; range)                              | 84<br>(68-100)                      | 74 <sup>&amp;</sup><br>(52-100)                                      |
| Median Hemoglobin<br>(g/dL; range)<br>(g/L; range)                                    | 13.1(12.5- 13.7)<br>(131) (125-137) | 10.7 <sup>&amp;</sup> (8.8-15.7)<br>( 107) <sup>&amp;</sup> (88-157) |
| Median Leukocyte Count<br>(10 <sup>3</sup> /μL; range)<br>(10 <sup>9</sup> /L; range) | 16.550 (16.400-16.700)              | 12.650 <sup>&amp;</sup> (5.000-50.000)                               |
| Median Platelet Count<br>(10 <sup>3</sup> /μL; range)<br>(10 <sup>9</sup> /μL; range) | 601.500 (491.000-712.000)           | 959.500 <sup>&amp;</sup> (183.000-1,480.000)                         |
| Median Spleen size<br>(cm; range)                                                     | 10<br>(0-20)                        | 1 <sup>&amp;</sup><br>(0-5)                                          |

\* One patient was assayed at 2.5 years and 6 months before clinically apparent transformation to acute leukemia and is represented twice because her 10 gene assay score went from 4 to 6 and subsequently remained above 4. <sup>&</sup> not significantly different

Table S11. Clinical features of the 8 patient training set and their 10 gene assay scores.

| Gender | Age (years) | Disease Duration (years) | JAK2 V617F Allele Burden (%) | Hemoglobin (g/dL) (g/L) | Leukocyte Count ( $10^3/\mu\text{L}$ ) ( $10^9/\text{L}$ ) | Platelet Count ( $10^3/\mu\text{L}$ ) ( $10^9/\text{L}$ ) | Spleen Size (cm) | Splenectomy | Thrombosis | Therapy | Acute Leukemia | Alive | Gene Expression Phenotype | 10 Gene Assay Score |
|--------|-------------|--------------------------|------------------------------|-------------------------|------------------------------------------------------------|-----------------------------------------------------------|------------------|-------------|------------|---------|----------------|-------|---------------------------|---------------------|
| F      | 48          | 18                       | 100                          | 10.4 (104)              | 50.000                                                     | 1,017.000                                                 | 5                | Yes         | Yes        | Yes     | Yes            | No    | Aggressive                | 6                   |
| M      | 72          | 25                       | 100                          | 12.5 (125)              | 16.700                                                     | 491.000                                                   | 20               | Yes         | No         | Yes     | No             | No    | Aggressive                | 5                   |
| F*     | 84          | 13                       | 68                           | 8.8 (88)                | 9.000                                                      | 971.000                                                   | 2                | Yes         | No         | Yes     | Yes            | No    | Aggressive                | 6                   |
| F*     | 82          | 10                       | 52                           | 11.5 (115)              | 5.000                                                      | 948.000                                                   | 0                | No          | No         | Yes     | No             | Yes   | Indolent                  | 3                   |
| M      | 72          | 1                        | 68                           | 13.7 (137)              | 16.400                                                     | 712.000                                                   | 0                | No          | No         | No      | No             | Yes   | Indolent                  | 4                   |
| F      | 46          | 4                        | 82                           | 11.1 (111)              | 20.500                                                     | 1,480.000                                                 | 0                | No          | No         | Yes     | No             | Yes   | Indolent                  | 4                   |
| F      | 71          | 1                        | 100                          | 14.7 (147)              | 22.790                                                     | 332.000                                                   | 0                | No          | No         | No      | No             | Yes   | Indolent                  | 3                   |
| F      | 60          | 9                        | 60                           | 12.5 (125)              | 13.800                                                     | 1,117.000                                                 | 4                | No          | No         | No      | No             | Yes   | Indolent                  | 3                   |

\* This patient, who was part of the indolent group in the original 19 patient gene expression profiling cohort, subsequently transformed to acute leukemia four years after gene expression profiling and is represented by two 10 gene assay scores: one 2.5 years before and one 6 months before the leukemia was clinically apparent, which subsequently remained above 4.

Table S12. Clinical phenotype of the 8 patient training set segregated according to their 10 gene assay score.

| Phenotype                                                                 | 10 Gene Score          |                          | p Value    |
|---------------------------------------------------------------------------|------------------------|--------------------------|------------|
|                                                                           | >4                     | <5                       |            |
| Gender (M/F)                                                              | 1/2*                   | 1/4*                     | -          |
| Age (years, median)                                                       | 72                     | 72                       | ns&        |
| (range)                                                                   | (48-84)                | (46-82)                  |            |
| Disease Duration (years, median)                                          | 18                     | 5                        | P = 0.031¶ |
| (range)                                                                   | (13-25)                | (1-15)                   |            |
| Jak2 V 617F neutrophil allele burden (%)                                  | 100                    | 68                       | ns         |
| (range)                                                                   | (68-100)               | (52-82)                  |            |
| Hemoglobin (g/dL, median) (g/L; median)                                   | 10.4<br>(104)          | 11.5<br>(115)            | ns         |
| (range)                                                                   | (8.8-12.5)<br>(88-125) | (10.4-15.7)<br>(104-157) |            |
| Leukocyte count( $10^3/\mu\text{L}$ , median) ( $10^9/\text{L}$ ; median) | 16.700                 | 16.000                   | ns         |
| (range)                                                                   | (9.000-50.000)         | (5.000-20.500)           |            |
| Platelet count ( $10^3/\mu\text{L}$ , median) ( $10^9/\text{L}$ ; median) | 971.000                | 890.000                  | ns         |
| (range)                                                                   | (491.000- 1,000.000)   | (183.000-1,480.000)      |            |
| Thrombosis (n)                                                            | 1/3                    | 0/5                      | ns         |
| Palpable splenomegaly (n)                                                 | 3/3                    | 1/5                      | ns         |
| Spleen size (cm)                                                          | 5                      | 0                        | ns         |
| (range)                                                                   | (2-20)                 | (0-4)                    |            |
| Splenectomy (n)                                                           | 3/3                    | 0/5                      | 0.017#     |
| Chemotherapy (n)                                                          | 3/3                    | 3/5                      | ns         |
| Transformation to AML                                                     | 2/3                    | 0/5                      | ns         |
| Survival (n)                                                              | 0/3                    | 4/5                      | ns         |

\* One patient was assayed at 2.5 years and 6 months before clinically apparent transformation to acute leukemia and is represented in each group because her 10 gene score went from 4 to 6 and subsequently remained above 4. &not significantly different

¶Student t Test # Fisher Exact Probability Test (two-tailed)

Table S13. Clinical features by gender of the 30 patient test set for the 10 gene assay.

|                                                                                       | Men (12)                                  | Women (18)                                               |
|---------------------------------------------------------------------------------------|-------------------------------------------|----------------------------------------------------------|
| Median Age<br>(years; range)                                                          | 69.5<br>(54-77)                           | 63.5 <sup>&amp;</sup><br>(43-79)                         |
| Median Disease Duration<br>(years; range)                                             | 7<br>(2-27)                               | 11.5 <sup>&amp;</sup><br>(1-39)                          |
| Median JAK2 V617F Neutrophil<br>Allele Burden<br>(%; range)                           | 89.5<br>(48-100)                          | 84.0 <sup>&amp;</sup><br>(44-100)                        |
| Median Hemoglobin<br>(g/d; range)<br>(g/L; range)                                     | 12.9<br>(10.3-16.0)<br>(129)<br>(103-160) | 12.0 <sup>&amp;</sup><br>(8.3-15.9)<br>(120)<br>(83-159) |
| Median Leukocyte Count<br>(10 <sup>3</sup> /μL; range)<br>(10 <sup>9</sup> /L; range) | 16.800<br>(7.700-34.100)                  | 11.500 <sup>&amp;</sup><br>(5.400-98.500)                |
| Median Platelet Count<br>(10 <sup>3</sup> /μL; range)<br>(10 <sup>9</sup> /L; range)  | 664.000<br>(110.000-996.000)              | 492.500 <sup>&amp;</sup><br>(38.000-1,556.000)           |
| Median Spleen size<br>(cm; range)                                                     | 2.0<br>(0-28)                             | 4.0 <sup>&amp;</sup><br>(0-14)                           |

<sup>&</sup>not significantly different



Table S14. Clinical features of the 30 patient test set with their 10 gene assay scores.

| Gender | Age (years) | Disease Duration (years) | Hemoglobin (g/dL) (g/L) | Leukocyte count ( $10^3/\mu\text{L}$ ) ( $10^9/\text{L}$ ) | Platelet count ( $10^3/\mu\text{L}$ ) ( $10^9/\text{L}$ ) | Spleen size (cm below the left costal margin) | Splenectomy | JAK2 V617F neutrophil allele burden (%) | Thrombosis | Therapy                                         | 10 gene assay score |
|--------|-------------|--------------------------|-------------------------|------------------------------------------------------------|-----------------------------------------------------------|-----------------------------------------------|-------------|-----------------------------------------|------------|-------------------------------------------------|---------------------|
| F      | 66          | 12                       | 10.5 (105)              | 98.500                                                     | 599.000                                                   | Unknown                                       | Yes         | 100                                     | Yes        | Phlebotomy, Hydroxyurea, Anagrelide, Interferon | 5                   |
| M      | 54          | 3                        | 12.1 (121)              | 15.600                                                     | 559.000                                                   | 0                                             | No          | 90                                      | No         | Phlebotomy                                      | 2                   |
| F      | 48          | 3                        | 14.0 (140)              | 28.200                                                     | 779.000                                                   | 0                                             | No          | 96                                      | No         | Phlebotomy                                      | 4                   |
| F      | 68          | 13                       | 13.4 (134)              | 31.000                                                     | 422.000                                                   | Unknown                                       | Yes         | 97                                      | Yes        | Hydroxyurea                                     | 3                   |
| M      | 60          | 7                        | 12.8 (128)              | 34.100                                                     | 959.000                                                   | 0                                             | No          | 94                                      | No         | Phlebotomy                                      | 4                   |
| F      | 64          | 19                       | 9.8 (98)                | 39.000                                                     | 434.000                                                   | 14                                            | No          | 90                                      | No         | Phlebotomy, Interferon, Anagrelide, TKI*        | 6                   |
| F      | 66          | 17                       | 9.3 (93)                | 5.400                                                      | 1,556.000                                                 | 0                                             | No          | 50                                      | No         | Phlebotomy                                      | 3                   |
| M      | 77          | 10                       | 10.7 (107)              | 24.800                                                     | 996.000                                                   | 4                                             | No          | 97                                      | No         | Phlebotomy, Hydroxyurea                         | 2                   |
| M      | 71          | 6                        | 10.3 (103)              | 17.200                                                     | 1,320.000                                                 | 0                                             | No          | 52                                      | No         | Phlebotomy                                      | 2                   |
| M      | 57          | 3                        | 13.6 (136)              | 16.400                                                     | 673.000                                                   | 0                                             | No          | 89                                      | No         | Phlebotomy                                      | 4                   |
| F      | 74          | 16                       | 15.7 (157)              | 11.800                                                     | 811.000                                                   | 0                                             | No          | 44                                      | No         | Phlebotomy                                      | 3                   |
| F      | 64          | 6                        | 12.0 (120)              | 22.180                                                     | 779.000                                                   | 0                                             | No          | 64                                      | No         | Phlebotomy                                      | 3                   |
| F      | 53          | 24                       | 11.0 (110)              | 35.200                                                     | 60.000                                                    | 14                                            | No          | 94                                      | Yes        | Phlebotomy, hydroxyurea, Interferon, TKI        | 6                   |
| F      | 63          | 9                        | 11.8                    | 11.200                                                     | 177.000                                                   | 10                                            | No          | 87                                      | Yes        | Phlebotomy                                      | 6                   |

|   |    |    |               |        |         |    |    |     |     |                                                                           |   |
|---|----|----|---------------|--------|---------|----|----|-----|-----|---------------------------------------------------------------------------|---|
|   |    |    | (118)         |        |         |    |    |     |     |                                                                           |   |
| M | 75 | 2  | 13.1<br>(131) | 13.400 | 936.000 | 0  | No | 48  | No  | Phlebotomy                                                                | 1 |
| F | 79 | 7  | 12.0<br>(120) | 26.000 | 605.000 | 4  | No | 81  | No  | Phlebotomy                                                                | 4 |
| M | 71 | 2  | 16.0<br>(160) | 30.600 | 849.000 | 2  | No | 95  | No  | Phlebotomy                                                                | 3 |
| F | 56 | 39 | 8.5<br>(85)   | 6,770  | 38.000  | 14 | No | 94  | Yes | Phlebotomy,<br>Cytosan,<br>Splenic<br>irradiation,<br>Thalidomide,<br>TKI | 6 |
| F | 48 | 1  | 13.0<br>(130) | 11.000 | 551.000 | 0  | No | 44  | No  | Phlebotomy                                                                | 3 |
| F | 46 | 11 | 12.3<br>(123) | 46.000 | 186.000 | 14 | No | 94  | No  | Phlebotomy,<br>Interferon                                                 | 6 |
| M | 68 | 17 | 12.6<br>(126) | 10.700 | 500.000 | 8  | No | 100 | No  | Phlebotomy,<br>Hydroxyurea,<br>Interferon,<br>TKI                         | 5 |
| M | 58 | 8  | 15.5<br>(155) | 21.000 | 655.000 | 3  | No | 81  | No  | Phlebotomy                                                                | 4 |
| F | 43 | 7  | 10.2<br>(102) | 7.460  | 695.000 | 3  | No | 44  | Yes | Phlebotomy                                                                | 3 |
| F | 64 | 26 | 13.2<br>(132) | 6.230  | 169,000 | 10 | No | 49  | Yes | Phlebotomy,<br>hydroxyurea,<br>irradiation                                | 0 |
| M | 76 | 12 | 12.7<br>(127) | 26.700 | 817.000 | 28 | No | 98  | Yes | Phlebotomy,<br>Anagrelide,<br>Hydroxyurea,<br>Interferon                  | 5 |
| F | 61 | 20 | 10.8<br>(108) | 10.600 | 158.000 | 6  | No | 52  | No  | Phlebotomy,<br>Interferon                                                 | 5 |
| M | 64 | 7  | 14.0<br>(140) | 7.700  | 439.000 | 0  | No | 49  | Yes | Phlebotomy                                                                | 2 |
| M | 75 | 27 | 15.8<br>(158) | 13.400 | 110.000 | 5  | No | 87  | Yes | Phlebotomy,<br>Hydroxyurea                                                | 5 |
| F | 71 | 11 | 13.7<br>(137) | 6.530  | 585.000 | 0  | No | 51  | No  | Phlebotomy                                                                | 4 |
| F | 63 | 10 | 15.9<br>(159) | 10.000 | 384.000 | 0  | No | 90  | No  | Phlebotomy<br>Interferon                                                  | 4 |

\*TKI, tyrosine kinase inhibitor

Table S15. Clinical phenotype of the 30 patient test set segregated according to their 10 gene assay score.

| Phenotype                                     | 10 Gene Score    |                      | p Value    |
|-----------------------------------------------|------------------|----------------------|------------|
|                                               | >4               | <5                   |            |
| Gender (M/F)                                  | 3/7              | 9/11                 | ns&        |
| Age (years, median)                           | 63.5             | 64                   | ns         |
| (range)                                       | (46-76)          | (43-79)              |            |
| Disease Duration (years, median)              | 18               | 7                    | P < 0.001§ |
| (range)                                       | (9-39)           | (1-26)               |            |
| Jak2 V 617F neutrophil allele burden (%)      | 94               | 72                   | P < 0.021§ |
| (range)                                       | (52-100)         | (44-97)              |            |
| Hemoglobin (g/dL; median)                     | 11.4             | 13.1                 | ns         |
| (g/L; median)                                 | (114)            | (131)                |            |
| (range)                                       | (8.5-15.8)       | (9.3-16.0)           |            |
|                                               | (85-158)         | (93-160)             |            |
| Leukocyte count (10 <sup>3</sup> /μL; median) | 20.050           | 16.000               | ns         |
| (10 <sup>9</sup> /L; median)                  |                  |                      |            |
| (range)                                       | (6.770-98.500)   | (5.400-34.100)       |            |
| Platelet count (10 <sup>3</sup> /μL; median)  | 181.500          | 684.000              | P < 0.001¶ |
| (10 <sup>9</sup> /μL; median)                 |                  |                      |            |
| (range)                                       | (38.000-817.000) | (169.000-1,556.0000) |            |
| Thrombosis (n)                                | 6/10             | 4/20                 | P=0.044#   |
| Palpable splenomegaly (n)                     | 10/10            | 7/20                 | P < 0.001# |
| Spleen size (median, cm)                      | 14               | 0                    | P < 0.001§ |
| (range)                                       | (5-28)           | (0-10)               |            |
| Splenectomy (n)                               | 1/10             | 0/20                 | ns         |
| Chemotherapy (n)                              | 6/10             | 3/20                 | P < 0.030# |
| Transformation to AML (n)                     | 0/10             | 0/20                 | -          |
| Survival (n)                                  | 9/10             | 20/20                | ns         |

&ns = not significantly different    ¶Student t Test    #Fisher Exact Probability Test (two-tailed)    §Mann-Whitney Rank Sum Test

## Reference List

1. Barosi G, Viarengo G, Pecci A et al. Diagnostic and clinical relevance of the number of circulating CD34+ cells in myelofibrosis and myeloid metaplasia. *Blood* 2001;98(12):3249-3255.
2. Andreasson B, Swolin B, Kutti J. Increase of CD34 positive cells in polycythaemia vera. *Eur J Haematol* 1997;59(3):171-176.
3. Sugita M, Haney JL, Gemmill RM, Franklin WA. One-step duplex reverse transcription-polymerase chain reaction for quantitative assessment of RNA degradation. *Anal Biochem* 2001;295(1):113-116.
4. Tan AC, Naiman DQ, Xu L, Winslow RL, Geman D. Simple decision rules for classifying human cancers from gene expression profiles. *Bioinformatics* 2005;21(20):3896-3904.
5. Smyth GK. Limma:linear models for microarray data. In: R.Gentleman RVCSDRIaWH, editor. *Bioinformatics and Computational Biology Solutions using R and BioConductor*. New York: Springer; 2005:397-420.

## Additional Reading

1. Bruns I, Czibere A, Fischer JC et al. The hematopoietic stem cell in chronic phase CML is characterized by a transcriptional profile resembling normal myeloid progenitor cells and reflecting loss of quiescence. *Leukemia* 2009;23(5):892-899.
2. Diaz-Blanco E, Bruns I, Neumann F et al. Molecular signature of CD34(+) hematopoietic stem and progenitor cells of patients with CML in chronic phase. *Leukemia* 2007;21(3):494-504.
3. Graham SM, Vass JK, Holyoake TL, Graham GJ. Transcriptional analysis of quiescent and proliferating CD34+ human hemopoietic cells from normal and chronic myeloid leukemia sources. *Stem Cells* 2007;25(12):3111-3120.
4. Nowicki MO, Pawlowski P, Fischer T, Hess G, Pawlowski T, Skorski T. Chronic myelogenous leukemia molecular signature. *Oncogene* 2003;22(25):3952-3963.
5. Zheng C, Li L, Haak M et al. Gene expression profiling of CD34+ cells identifies a molecular signature of chronic myeloid leukemia blast crisis. *Leukemia* 2006;20(6):1028-1034.

6. Yamamoto-Sugitani M, Kuroda J, Ashihara E et al. Galectin-3 (Gal-3) induced by leukemia microenvironment promotes drug resistance and bone marrow lodgment in chronic myelogenous leukemia. *Proc Natl Acad Sci U S A* 2011;108(42):17468-17473.
7. Nakahara F, Sakata-Yanagimoto M, Komeno Y et al. Hes1 immortalizes committed progenitors and plays a role in blast crisis transition in chronic myelogenous leukemia. *Blood* 2010;115(14):2872-2881.
